# Supplementary material for: Orbital analysis of bonding in diarylhalonium salts and relevance to periodic trends in structure and reactivity
Source: Royal Society of Chemistry journal article supplement (doi:10.1039/d2sc02332f), 2022-01-01
Supplement: d2sc02332f1.pdf [file d2sc02332f1.pdf]

## Electronic supplementary information for

### **Orbital analysis of bonding in diarylhalonium salts and relevance to periodic trends in structure and bonding.**

Shubhendu Karandikar<sup>†</sup>, Avik Bhattacharjee<sup>†</sup>, Bryan E. Metzger<sup>†</sup>, Nicole Javalley<sup>†</sup>, Prof. Dr. Edward Valente<sup>‡</sup>, Prof. Dr. Theresa McCormick<sup>†\*</sup> and Prof. Dr. David R. Stuart<sup>†\*</sup>

<sup>†</sup>Department of Chemistry, Portland State University, Portland, Oregon 97201, United States.

<sup>‡</sup>Department of Chemistry, University of Portland, Portland, Oregon, 97203, United States.

#### **Contents**

|                                                                                                                            |    |
|----------------------------------------------------------------------------------------------------------------------------|----|
| 1. General considerations .....                                                                                            | 3  |
| 1.1 Experimental section .....                                                                                             | 3  |
| 1.2 Computational section .....                                                                                            | 3  |
| 2. Synthesis and characterization of compounds .....                                                                       | 4  |
| 2.1 High resolution mass spectrometry traces .....                                                                         | 11 |
| 2.2 X-Ray diffraction data .....                                                                                           | 15 |
| 3. Conductivity measurements of Phenyl(Mes)halonium salts at 25 °C .....                                                   | 18 |
| 3.1 Phenyl(mesityl)iodonium tetrakis[3,5-bis(trifluoromethyl)phenyl]borate (16) in DCM .....                               | 19 |
| 3.2 Phenyl(mesityl)chloranium tetrakis[3,5-bis(trifluoromethyl)phenyl]borate (17) in DCM .....                             | 20 |
| 3.3 Phenyl(Mes)chloranium tetrakis[3,5-bis(trifluoromethyl)phenyl]borate (18) in DCM .....                                 | 21 |
| 4. Lewis-base interactions of 16-18 and 26-28 with pyridine .....                                                          | 22 |
| 4.1 Binding constant between compound 16 and pyridine in DCM-d <sub>2</sub> at room temperature .....                      | 24 |
| Stacked spectra – NMR titration of compound 16 with pyridine in DCM-d <sub>2</sub> at room temperature .....               | 25 |
| 4.2 Binding constant between compound 17 and pyridine in DCM-d <sub>2</sub> at room temperature .....                      | 26 |
| Stacked spectra – NMR titration of compound 17 with pyridine in DCM-d <sub>2</sub> at room temperature .....               | 27 |
| 4.3 Binding constant between compound 18 and pyridine in DCM-d <sub>2</sub> at room temperature .....                      | 28 |
| Stacked spectra – NMR titration of compound 18 with pyridine in DCM-d <sub>2</sub> at room temperature .....               | 29 |
| 4.4 Binding constant between compound 26 and pyridine in CDCl <sub>3</sub> at room temperature .....                       | 30 |
| Stacked spectra – NMR titration of compound 26 with pyridine in CDCl <sub>3</sub> at room temperature .....                | 31 |
| 4.5 Binding constant between compound 27 and pyridine in CDCl <sub>3</sub> at room temperature .....                       | 32 |
| Stacked spectra – NMR titration of compound 27 with pyridine in CDCl <sub>3</sub> at room temperature .....                | 33 |
| 4.6 Binding constant between compound 28 and pyridine in CDCl <sub>3</sub> at room temperature .....                       | 34 |
| Stacked spectra – NMR titration of compound 28 with pyridine in CDCl <sub>3</sub> at room temperature .....                | 35 |
| 5. Figure S1: Correlation of log K <sub>a</sub> and s-orbital character (NBO analysis) for compounds 16-18 and 26-28. .... | 36 |
| 6. Kinetic measurements of N-mesylation of pyridine using Phenyl(Mes)halonium salts .....                                  | 37 |
| 6.1 N-Mesylation of pyridine using Phenyl(Mes)chloranium salt (0.05 M, 1.0 equiv of Pyridine) .....                        | 37 |
| 6.2 N-Mesylation of pyridine using Phenyl(Mes)chloranium salt (0.1 M, 2.0 equiv of Pyridine) .....                         | 40 |
| 6.3 N-mesylation of pyridine using Phenyl(Mes)bromonium salt (0.05M, 1.0 equiv pyridine) .....                             | 42 |

|                                                                                                                        |    |
|------------------------------------------------------------------------------------------------------------------------|----|
| 6.4 N-mesylation of pyridine using Phenyl(Mes)bromonium salt (0.05M, 1.0 equiv pyridine). .....                        | 45 |
| 7. Table S1: X-Ray and DFT bond angles (C-E-C) and % - orbital contributions for compounds 1-18, 20-22, and 26-28..... | 47 |
| 8. Table S2: Hirshfeld charges on central atom (E) for compounds 1-18, 20-22, and 26-28. ....                          | 50 |
| 9. Figure S2: Correlation of Hirshfeld charges on central atom (E) and DFT bond angles (C-E-C).....                    | 51 |
| 10. NMR spectra .....                                                                                                  | 53 |
| 11. References .....                                                                                                   | 78 |

## 1. General considerations

### 1.1 Experimental section

Commercially available reagents and solvents were used without further purification. Compounds **S1** (Mes-N<sub>2</sub><sup>+</sup> BF<sub>4</sub><sup>-</sup>)<sup>1</sup>, **S3** (phenyl(Mes)iodonium tetrafluoroborate)<sup>2</sup>, **S4**<sup>3</sup>, **S5**<sup>5</sup>, **S6**<sup>4</sup>, **21**<sup>4</sup>, **22**<sup>4</sup>, **24**<sup>4</sup>, **26**<sup>5</sup>, **27**<sup>6</sup> were prepared by according to literature procedures and the spectral data were consistent with those previously reported. Compound Mes-N<sub>2</sub><sup>+</sup> BArF<sup>-</sup> (**S2**) was prepared by modifying the literature procedure.<sup>7</sup> Crude reaction mixtures were analyzed by <sup>1</sup>H NMR spectroscopy or thin-layer chromatography (TLC) on SelectoScientific Flexible TLC plates (silica gel 60 Å F-254) and visualized by UV irradiation or iodine stain. NMR yields of experiments were obtained by integration of peaks known for the analyte molecules. Crude material was purified by flash column chromatography on SilicaFlash P60 silica gel, unless otherwise stated. All other compounds were prepared as described in detail below. <sup>1</sup>H, <sup>13</sup>C{<sup>1</sup>H}, <sup>19</sup>F{<sup>1</sup>H} NMR spectra were obtained at 298 K in CD<sub>2</sub>Cl<sub>2</sub>, CDCl<sub>3</sub>, DMSO-d<sub>6</sub> or CD<sub>3</sub>CN on Bruker Avance 400 MHz or Bruker Avance 600 MHz spectrometer and referenced to residual solvent peaks<sup>8</sup> or tetramethylsilane when applicable. The following notation is used: s – singlet, d – doublet, dd – doublet of doublets, ddd – doublet of doublet of doublets, t – triplet, q – quartet, n – nonet, br – broad signal, m – multiplet. High resolution mass spectrometry (HRMS) data were obtained on Thermo Scientific Q-exactive mass spectrometer by electron spray ionization (ESI) with an ion trap mass analyzer or by electron impact ionization. Infrared spectra were recorded on ATR/FT-IR spectrometer. Melting points (°C) were obtained on the Stuart SMP10 melting point apparatus and are uncorrected. Conductivity of phenyl(Mes)halonium salts **16-18** in dichloromethane solution were measured at 25 °C using METTLER TOLEDO™ Seven2Go S3 Conductivity Meter (30207955) with InLab 738-ISM conductivity/temperature electrode (51344120). X-ray data were collected on an Oxford Gemini system. Structures were solved with SHELXS-86 and refined with SHELXL-97.<sup>9</sup>

### 1.2 Computational section

The crystal structure data of the molecules (.cif files) were acquired from the *Cambridge Crystallographic Database*. To determine the suitable computational method and basis sets for the subsequent calculations, we used the crystal structure of diphenyliodonium iodide, and optimized the molecule in two methods: B3LYP and M06-2X using different split basis sets.<sup>10-14</sup> After comparing the *single-point energies* of the computationally optimized structure with the energy of the crystal data of the molecule, we adopted B3LYP method along with the combination of Def2QZVPP (*for I atom*), and cc-pVTZ (*for C, and H atoms*) basis sets. All other molecules were optimized utilizing the same quantum chemical methods [B3LYP/ Def2QZVPP (*for I, and Te*) and cc-pVTZ (*for C, H, N, O, S, Se, F, Cl, Br, B, P*)] in gas phase using *Gaussian 09* suite of quantum chemistry programs. Frequency calculations, using same method and basis sets combinations, each of the molecules resulted in no imaginary frequency further proving the reliability of the optimized structures. The % *s/p-character* of the central halogen and chalcogen atoms were calculated by the natural bond orbital method<sup>15-18</sup> using NBO 3.1 module as implemented in the *Gaussian 09* programs in B3LYP/ LanI2dz method. The *Hirshfeld charge* calculation was done using *Multiwfn 3.7* software.<sup>19,20</sup> The cartesian coordinates for the optimized structures from DFT calculations are available in a separate Excel sheet in the supporting information section.

## 2. Synthesis and characterization of compounds

### 2,4,6-trimethylbenzenediazonium tetrafluoroborate (S1)

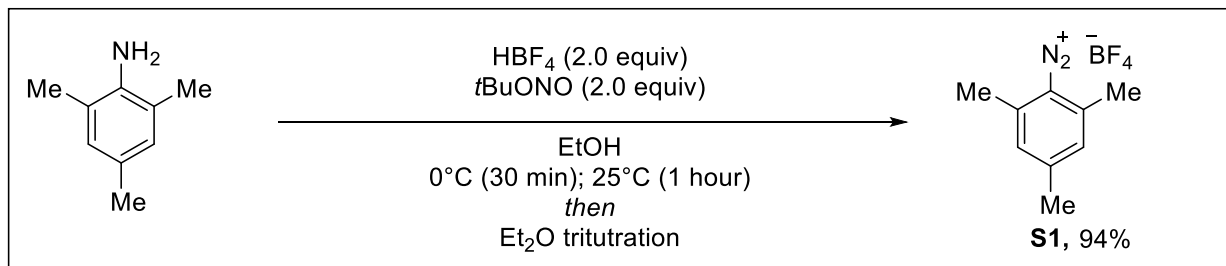

Prepared from 2,4,6-trimethylaniline using a known protocol<sup>21</sup> on 0.01 mol scale. An oven-dried 250 mL round bottom flask equipped with stir bar was charged with 1.4 mL 2,4,6-trimethylaniline (0.010 mol, 1.0 equiv) and dissolved in 100 mL ethanol. 2.5 mL HBF<sub>4</sub> (50% in H<sub>2</sub>O) (0.020 mol, 2.0 equiv) was added and the solution was cooled to 0 °C in an ice bath. After the internal temperature reached 0 °C, 2.6 mL *tert*-butyl nitrite (0.020 mol, 2.0 equiv) was added drop wise over a period of 2 mins at 0 °C. The reaction was allowed to stir at the same temperature for 30 mins. After 30 mins, the reaction was allowed to warm-up to room temperature and stirred for another 1 hour at room temperature, during which the precipitates of the diazonium salt appeared. The reaction mixture was trituated in Et<sub>2</sub>O and filtered. The filter cake was washed with Et<sub>2</sub>O and dried under vacuum. The product 2,4,6-trimethylbenzenediazonium tetrafluoroborate was isolated as a white solid (2.2g, 94% yield). Spectral data was consistent with previous reports.<sup>21</sup> The salt was stored at -16 °C.

### 2,4,6-trimethylbenzenediazonium tetrakis[3,5-bis(trifluoromethyl)phenyl]borate (S2)

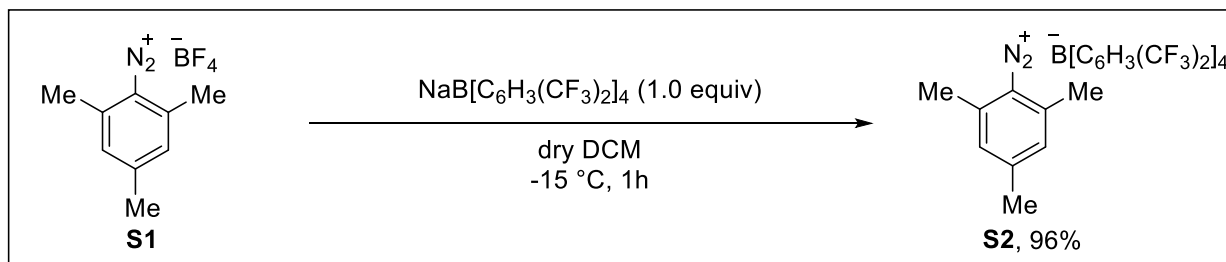

A flame dried 50 mL round bottom flask was charged with 0.234 g (0.001 mol, 1.0 equiv) of 2,4,6-trimethylbenzenediazonium tetrafluoroborate and suspended in 10 mL dry DCM. The mixture was cooled to -15 °C using ice-methanol mixture. To this cooled solution, 0.88 g sodium tetrakis[3,5-bis(trifluoromethyl)phenyl]borate was added in parts. The reaction was stirred at the same temperature for 1 hour and filtered. The residue (NaBF<sub>4</sub>) was washed with cold DCM and the combined filtrate was concentrated *in-vacuo* keeping the temperature of the water bath below 10 °C (Note: Failing to keep the temperature low caused thermal decomposition of the diazonium salt). 2,4,6-trimethylbenzenediazonium tetrakis[3,5-bis(trifluoromethyl)phenyl]borate was isolated as a free-flowing tan solid (0.97 g, 96% yield) and was stored at -16 °C.

<sup>1</sup>H NMR (400 MHz, [D<sub>3</sub>] MeCN): δ = 7.54-7.60 (m, 8H), 7.50-7.54 (m, 4H), 7.23 (s, 2H), 2.49 (s, 6H), 2.32 (s, 3H) ppm.

<sup>13</sup>C{<sup>1</sup>H} NMR (101 MHz, [D<sub>3</sub>] MeCN): δ = 162.25 (q, <sup>1</sup>J<sub>B-C</sub> = 50.1 Hz), 156.3, 145.4, 135.3, 132.0, 129.6 (qq, *J*<sub>1</sub> = 64.0 Hz, *J*<sub>2</sub> = 6.0 Hz), 125.1 (q, <sup>1</sup>J<sub>C-F</sub> = 272.8 Hz), 117.9, 22., 19.9 ppm.

$^{19}\text{F}\{^1\text{H}\}$  NMR (376 MHz, [D3] MeCN):  $\delta = -63.2$  ppm.

**FT-IR:** ( $\text{cm}^{-1}$ ) 2216, 1589, 1465, 1352, 1310, 1271, 1109, 946, 929, 887, 859, 838, 745, 714, 681, 667.

**Melting point:** 57-59 °C (decomposition beyond 69 °C)

**HRMS** (ESI, positive):  $m/z$  calc'd for  $\text{C}_9\text{H}_{11}\text{N}_2$  [M-B(C<sub>8</sub>H<sub>3</sub>F<sub>6</sub>)<sub>4</sub>]<sup>+</sup>: 147.09167, found 147.09152

**HRMS** (ESI, negative):  $m/z$  calc'd for [M-C<sub>9</sub>H<sub>11</sub>N<sub>2</sub>]<sup>-</sup>: 863.06488, found 863.06538

**Phenyl(mesityl)iodonium tetrakis[3,5-bis(trifluoromethyl)phenyl]borate (16)**

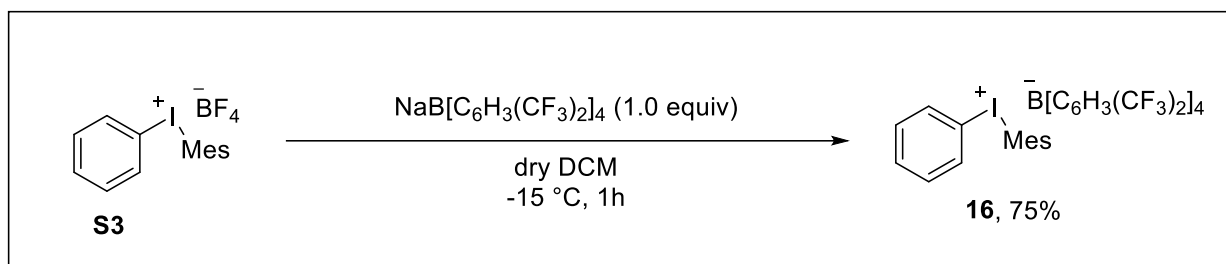

A flame dried 50 mL round bottom flask equipped with stir bar was charged with 0.41 g (0.001 mol) phenyl(Mes)iodonium tetrafluoroborate and suspended in 10 mL dry DCM. The reaction mixture was cooled to -15 °C using ice-methanol mixture. To this cooled solution, 0.88 g sodium tetrakis[3,5-bis(trifluoromethyl)phenyl]borate was added in parts. The reaction was stirred at the same temperature for 1 hour and filtered. The residue (NaBF<sub>4</sub>) was washed with cold DCM and the combined filtrate was concentrated *in-vacuo*. The crude solid was crystallized from DCM: hexanes mixture. The product was obtained as white solid (0.89g, 75%) after crystallization.

$^1\text{H}$  NMR (400 MHz, [D3] MeCN):  $\delta = 7.85$  (d,  $J = 7.7$  Hz, 2H), 7.75 - 7.61 (m, 13H), 7.49 (t,  $J = 8.0$  Hz, 2H), 7.22 (s, 2H), 2.60 (s, 6H), 2.33 (s, 3H) ppm.

$^{13}\text{C}\{^1\text{H}\}$  NMR (101 MHz, [D3] MeCN):  $\delta = 162.2$  (q,  $^1J_{\text{B-C}} = 50.5$  Hz), 145.7, 143.2, 135.3, 134.8, 133.2, 133.1, 131.1, 129.6 (qq,  $^2J_{\text{C-F}} = 64.0$  Hz,  $^5J_{\text{C-F}} = 6.0$  Hz), 125.1 (q,  $^1J_{\text{C-F}} = 274.0$  Hz), 121.1, 117.9, 112.6, 26.8, 20.6 ppm.

$^{19}\text{F}\{^1\text{H}\}$  NMR (376 MHz, [D3] MeCN):  $\delta = -63.2$  ppm.

**FT-IR:** ( $\text{cm}^{-1}$ ) 3455, 3015, 2969, 2964, 1738, 1609, 1446, 1353, 1271, 1228, 1216, 1158, 1111, 985, 925, 902, 885, 850, 837, 744, 723, 714, 681, 677, 645.

**Melting point:** 145-147 °C

**HRMS** (ESI, positive)  $m/z$  calc'd for  $\text{C}_{15}\text{H}_{16}$  [(M-B(C<sub>8</sub>H<sub>3</sub>F<sub>6</sub>)<sub>4</sub>)<sup>+</sup>]: 323.02912; found 323.02823.

**HRMS** (ESI, negative)  $m/z$  calc'd for [M-C<sub>15</sub>H<sub>16</sub>Cl]<sup>-</sup>: 863.06488; found 863.06649.

## Phenyl(mesityl)bromonium tetrakis[3,5-bis(trifluoromethyl)phenyl]borate (17)

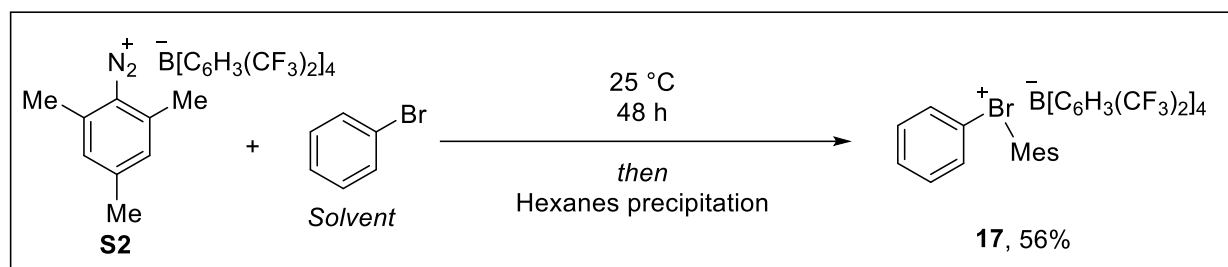

A flame dried 12 mL vial equipped with stir bar was charged with 0.45g (0.00044 mol) **S1**. The solid was suspended in 2 mL bromobenzene and the brown-coloured slurry was allowed to stir at room temperature for 48 hours. The colour changes from brown to black over a period of 1 hour. After 48 hours, the reaction mixture was triturated with 6 mL hexanes and carefully decanted. Trituration in hexane was repeated three times. The resulting crude solid was dissolved in minimum amount of DCM and hexanes was added as anti-solvent to cause precipitation. The product Phenyl(mesityl)bromonium tetrakis[3,5-bis(trifluoromethyl)phenyl]borate was obtained as a white free flowing solid (0.28 g, 56% ) after crystallization.

**<sup>1</sup>H NMR** (400 MHz, [D3] MeCN):  $\delta$  = 7.76-7.57 (m, 17H), 7.26 (s, 2H), 2.54 (s, 6H), 2.35 (s, 3H) ppm.

**<sup>13</sup>C{<sup>1</sup>H} NMR** (101 MHz, [D3] MeCN):  $\delta$  = 162.2 (q,  $^1J_{B-C}$  = 50.5 Hz), 146.0, 140.0, 135.3, 133.5, 133.4, 133.4, 132.7, 131.9, 129.6 (qq,  $^2J_{C-F}$  = 64.0 Hz,  $^5J_{C-F}$  = 6.0 Hz), 129.0, 125.1 (q,  $^1J_{C-F}$  = 274Hz), 119.9, 22.0, 20.6 ppm.

**<sup>19</sup>F{<sup>1</sup>H} NMR** (376 MHz, [D3] MeCN):  $\delta$  = -63.2 ppm.

**FT-IR:** (cm<sup>-1</sup>) 3015, 2969, 1738, 1610, 1588, 1559, 1468, 1451, 1358, 1270, 1229, 1216, 1157, 1110, 885, 837, 710, 681, 677, 649.

**Melting point:** 150-154 °C

**HRMS** (ESI, positive) *m/z* calc'd for C<sub>15</sub>H<sub>16</sub>Br [(M-B(C<sub>8</sub>H<sub>3</sub>F<sub>6</sub>)<sub>4</sub>)<sup>+</sup>]: 275.04299; found: 275.04264

**HRMS** (ESI, negative) *m/z* calc'd for [M-C<sub>15</sub>H<sub>16</sub>Br]<sup>-</sup>: 863.06488; found: 863.06593.

## Phenyl(mesityl)chloranium tetrakis[3,5-bis(trifluoromethyl)phenyl]borate (18)

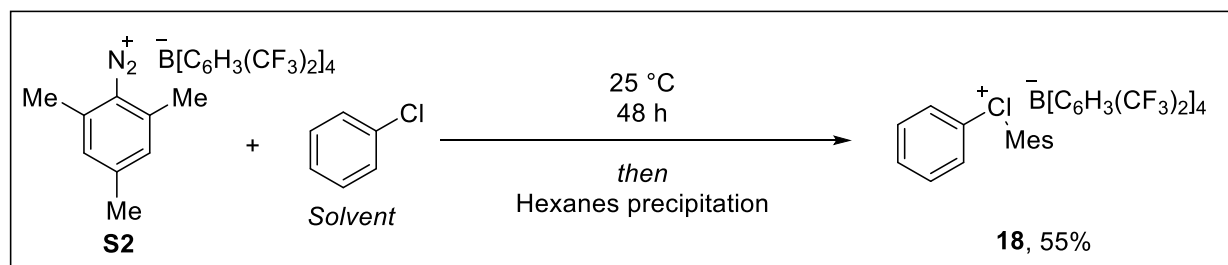

A flame dried 12 mL vial equipped with stir bar was charged with 0.45g (0.00044 mol, 1.0 equiv) **S1**. The solid was suspended in 2 mL chlorobenzene and the beige-coloured slurry was allowed to stir at room temperature for 48 hours. The colour changed from beige to dark brown over a period of 5 hours. After 48 hours, the reaction mixture was triturated with 6 mL hexanes and

carefully decanted. Trituration in hexane was repeated three times. The resulting crude solid was dissolved in minimum amount of DCM and hexanes was added as anti-solvent to cause precipitation. The product phenyl(mesityl)chloranium tetrakis[3,5-bis(trifluoromethyl)phenyl]borate was obtained as a white free flowing solid (0.26 g, 55% ) after crystallization.

**<sup>1</sup>H NMR** (400 MHz, [D<sub>3</sub>] MeCN): δ = 7.55-7.82 (m, 17H), 7.30 (s, 2H), 2.51 (s, 6H), 2.35 (s, 3H) ppm.

**<sup>13</sup>C{<sup>1</sup>H} NMR** (101 MHz, [D<sub>3</sub>] MeCN): δ = 162.7 (q, <sup>1</sup>J<sub>B-C</sub> = 50.5 Hz), 147.2, 140.0, 138.5, 135.7, 134.3, 134.0, 133.7, 133.6, 130.0 (qq, *J*<sub>1</sub> = 64.0 Hz, *J*<sub>2</sub> = 6.0 Hz), 126.7, 125.1 (q, <sup>1</sup>J<sub>C-F</sub> = 274.0 Hz), 119.9, 21.2, 19.9 ppm.

**<sup>19</sup>F{<sup>1</sup>H} NMR** (376 MHz, [D<sub>3</sub>] MeCN): δ = -63.2 ppm.

**FT-IR:** (cm<sup>-1</sup>) 1611, 1469, 1454, 1353, 1270, 1157, 1110, 885, 838, 715, 681, 668, 658.

**Melting point:** 138-141 °C

**HRMS** (ESI, positive): *m/z* calc'd for C<sub>15</sub>H<sub>16</sub>Cl [(M-B(C<sub>8</sub>H<sub>3</sub>F<sub>6</sub>)<sub>4</sub>)<sup>+</sup>]: 231.09350, found 231.09302

**HRMS** (ESI, negative): *m/z* calc'd for [M-C<sub>15</sub>H<sub>16</sub>Cl]<sup>-</sup>: 863.06488, found 863.06600.

### 1-mesitylpyridin-1-ium tetrakis[3,5-bis(trifluoromethyl)phenyl]borate (19)

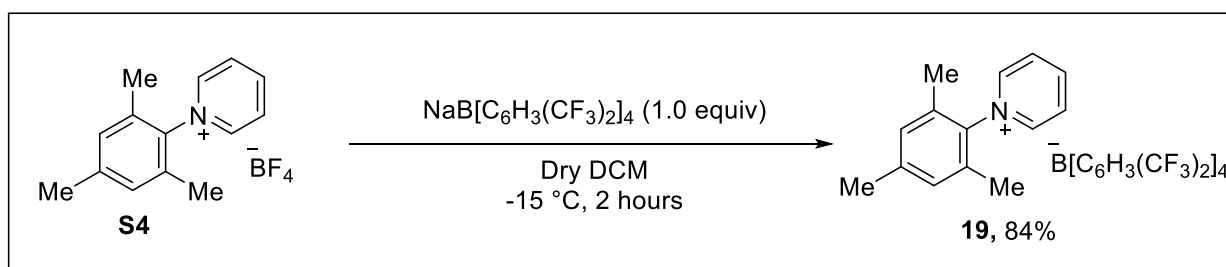

A flame dried 50 mL round bottom flask was charged with 0.1680 g (0.0058 mol, 1.0 equiv) of 1-mesitylpyridin-1-ium tetrafluoroborate (**S4**) followed by addition of 6 mL dry DCM. The mixture was cooled to -15 °C using ice-methanol mixture. To this cooled solution, 0.5100 g (0.0058 mol, 1.0 equiv) sodium tetrakis[3,5-bis(trifluoromethyl)phenyl]borate was added in parts. The reaction was stirred at the same temperature for 2 hours. The precipitated NaBF<sub>4</sub> was filtered, and the residue was washed with DCM. The filtrate was concentrated *in-vacuo* affording compound **19** as a free-flowing tan solid (0.5163 g, 84%).

**<sup>1</sup>H NMR** (400 MHz, CDCl<sub>3</sub>) δ = 8.40 (m, 1H), 8.35 (s, 1H), 8.33 (s, 1H), 7.14 (t, *J* = 7.14 Hz, 2H), 7.69 (m, 8H), 7.50 (br, 4H), 7.09 (s, 2H), 2.37 (s, 3H), 1.84 (s, 6H) ppm.

**<sup>13</sup>C{<sup>1</sup>H} NMR** (101 MHz, DMSO-*d*<sub>6</sub>) δ = 161.7 (q, *J*<sub>B-C</sub> = 49.8 Hz), 147.0, 145.1, 143.5, 134.7, 131.5, 130.7, 129.5-128.5 (m), 129.0, 124.5 (q, *J* = 272.5 Hz), 117.5, 21.0, 16.6 ppm.

**<sup>19</sup>F{<sup>1</sup>H} NMR** (376 MHz, DMSO-*d*<sub>6</sub>) δ = -62.4 ppm.

**FTIR:** 1628, 1610, 1473, 1352, 1270, 1112, 835, 837, 689, 681, 667 cm<sup>-1</sup>

**Melting point:** 130-131°C.

**HRMS** (ESI, negative):  $m/z$  calc'd for  $[M-C_{14}H_{14}N]^-$ : 863.06488, found 863.06540.

**HRMS** (ESI, positive):  $m/z$  calc'd for  $[M-B(C_8H_3F_6)_4]^+$ : 198.12827, found 198.12734.

### Dibenzo[*b,d*]chlorol-5-ium methanesulfonate (**22**)

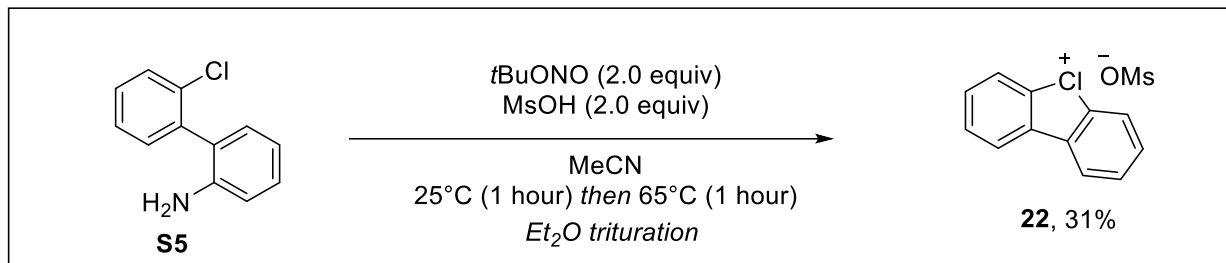

To flame dried 100ml round bottom flask was added **S5** (2'-chloro-[1,1'-biphenyl]-2-amine) (0.8682g, 3.4 mmol, 1.0 equiv) and Acetonitrile (35 ml). The solution was cooled to 0 °C and tert-butyl nitrite (1.429g, 6.8mmol, 2.0 equiv) was added. Methanesulfonic acid (1.332 g, 6.8 mmol, 2.0 equiv) was then added dropwise. The mixture was stirred at the same temperature for 1h then heated to 65 °C for 1h. The cooled reaction was triturated with diethyl ether, affording a crude solid. This crude product was dissolved in a minimum amount of methanol and was then triturated with diethyl ether affording **22** in 31% yield (0.3093 g, 1.054 mmol) as a tan free flowing powder.

**<sup>1</sup>H NMR** (400 MHz, DMSO-*d*<sub>6</sub>)  $\delta$  = 8.70 (t,  $J$  = 7.6 Hz, 4H), 7.99 (m, 4H), 2.34 (s, 3H) ppm.

**<sup>13</sup>C{<sup>1</sup>H} NMR** (101 MHz, DMSO-*d*<sub>6</sub>)  $\delta$  = 140.5, 132.5, 132.2, 126.0, 123.5, 40.3 ppm.

**FTIR**: 3107, 3090, 3011, 1597, 1457, 1287, 1236, 1156, 1017, 958, 873, 751, 657 cm<sup>-1</sup>

**Melting point**: 117-118 °C.

**HRMS** (ESI, positive):  $m/z$   $[M-OMs]^+$  calc'd for C<sub>12</sub>H<sub>8</sub>Cl: 187.03090; Found: 187.03049.

### 5-(2-chlorophenyl)-1,4-dihydro-1,4-epoxynaphthalene (**25**)

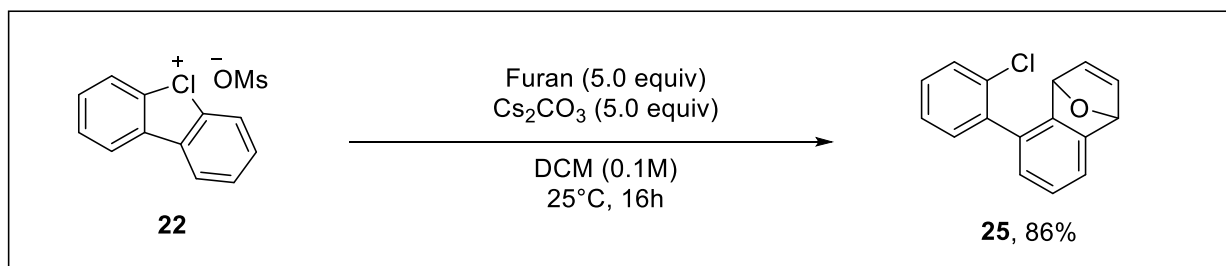

Compound **20** (0.0846 g, 0.3 mmol, 1 equiv), DCM (3 ml), and furan (0.109 ml, 1.5 mmol, 5 equiv.) were added to a 12 mL vial equipped with a magnetic stir bar. Cs<sub>2</sub>CO<sub>3</sub> (0.2930 g, 0.9 mmol, 3 equiv) was added in one portion, under constant stirring. The reaction was allowed to stir for 16 hours at room temperature. Upon completion, the reaction was quenched with brine, the organic layer removed, and the aqueous layer was extracted with EtOAc (3 x 3ml). The combined organic layers were dried over MgSO<sub>4</sub> and concentrated under reduced pressure. The crude mixture was



purified using flash column chromatography (5% EtOAc in hexanes) to afford 5-(2-chlorophenyl)-1,4-dihydro-1,4-epoxynaphthalene in 86% yield (0.0629 g, 0.258 mmol) as a light yellow oil.

$R_f = 0.35$  in 12% EtOAc/Hexanes

$^1\text{H NMR}$  (400 MHz,  $\text{CDCl}_3$ )  $\delta = 7.51\text{--}7.46$  (m, 1H), 7.34–7.30 (m, 2H), 7.27–7.23 (m, 2H), 7.12 (br, 1H), 7.08–7.03 (m, 2H), 6.94 (d,  $J = 7.9$  Hz, 1H), 5.76 (s, 1H), 5.52 (s, 1H) ppm.

$^{13}\text{C}\{^1\text{H}\}$  NMR (101 MHz,  $\text{CDCl}_3$ )  $\delta = 148.8, 148.3, 142.8, 138.4, 132.7, 132.3, 131.4, 129.8, 129.0$  (2C), 126.8, 126.3, 125.0, 119.6, 82.5, 81.7 ppm.

FTIR: 3054, 3011, 1455, 1279, 1049, 1031, 851, 721, 695  $\text{cm}^{-1}$

Melting point: 117–118  $^\circ\text{C}$ .

HRMS (ESI, positive):  $m/z$   $[\text{M}+\text{Na}]^+$  Calc'd for  $\text{C}_{16}\text{H}_{11}\text{ClONa}^+$  277.039613; Found: 277.03880

### Dibenzo[*b,d*]chlorol-5-ium tetrafluoroborate (**S6**)

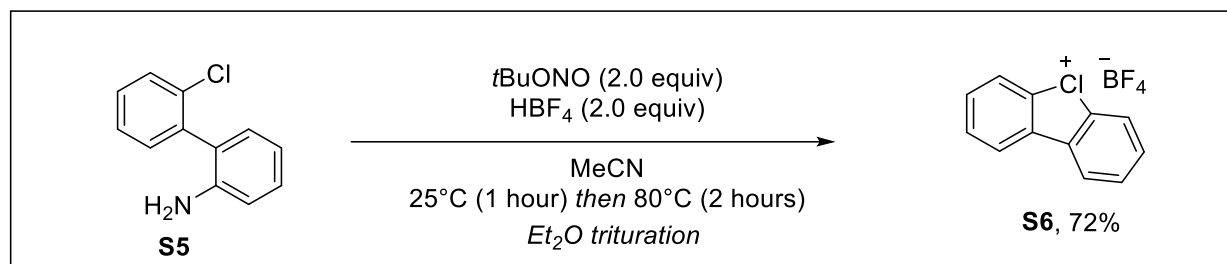

To flame dried 100ml round bottom flask was added **S5** (2'-chloro-[1,1'-biphenyl]-2-amine) (0.454g, 2.2 mol, 1.0 equiv) and Acetonitrile (25 ml). The solution was cooled to 0  $^\circ\text{C}$  and tert-butyl nitrite (0.93 g, 4.4 mmol, 2.0 equiv) was added.  $\text{HBF}_4$  (48% in  $\text{H}_2\text{O}$ ) (0.57 mL, 4.4 mmol, 2.0 equiv) was then added dropwise. The mixture was stirred at the same temperature for 1h then heated to 80  $^\circ\text{C}$  for 2h. The cooled reaction was triturated with diethyl ether, affording a crude solid. This crude product was dissolved in a minimum amount of methanol and was then triturated with diethyl ether affording **S6** in 72% yield (0.432 g, 1.57 mmol) as a white free flowing powder.

$^1\text{H NMR}$  (400 MHz,  $\text{DMSO-}d_6$ )  $\delta = 8.88\text{--}8.86$  (m, 4H), 8.10–7.85 (m, 4H) ppm.

$^{13}\text{C}\{^1\text{H}\}$  NMR (101 MHz,  $\text{DMSO-}d_6$ )  $\delta = 140.5, 132.5, 132.2, 126.0, 123.4$  ppm.

$^{19}\text{F NMR}$  (376 MHz,  $\text{DMSO-}d_6$ )  $\delta = 148.2$  (1:3) ppm.

## Dibenzo[*b,d*]chlorol-5-ium tetrakis[3,5-bis(trifluoromethyl)phenyl]borate (**28**)

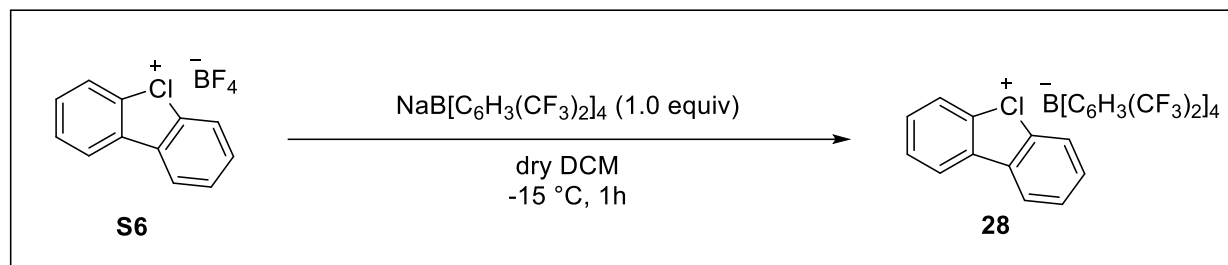

Dibenzo[*b,d*]chlorol-5-ium tetrafluoroborate(ref) (1.0 equiv) was charged into the oven-dried round bottom flask and suspended in dry DCM. The mixture was cooled to -15 °C using ice-methanol mixture. To this cooled solution, 1.0 equiv sodium tetrakis[3,5bis(trifluoromethyl)phenyl] borate was added in parts. The reaction was stirred at the same temperature for 2 hours. The precipitated NaBF<sub>4</sub> was filtered, and the residue was washed with DCM. The filtrate was concentrated *in-vacuo* affording compound **28** as a free-flowing pale brown solid.

**<sup>1</sup>H NMR** (600 MHz, DMSO-*d*<sub>6</sub>) δ 8.74 – 8.62 (m, 1H), 8.00 (t, *J* = 7.5 Hz, 0H), 7.95 (td, *J* = 8.1, 7.5, 1.5 Hz, 1H), 7.63 (d, *J* = 16.3 Hz, 3H) ppm.

**<sup>13</sup>C NMR** (151 MHz, DMSO-*d*<sub>6</sub>) δ 161.4 (q, <sup>1</sup>*J*<sub>B-C</sub> = 50.5 Hz), 140.5, 134.5, 132.5, 132.4, 132.1, 128.9 (q, *J* = 31.4 Hz), 125.9, 124.4 (q, <sup>1</sup>*J*<sub>C-F</sub> = 274.0 Hz), 118.0 ppm.

**<sup>19</sup>F NMR** (565 MHz, DMSO-*d*<sub>6</sub>) δ -61.9 ppm.

**Melting Point:** 138-140° C

**HRMS** (ESI, positive) *m/z* calc'd for C<sub>12</sub>H<sub>8</sub>Cl [(M-B(C<sub>8</sub>H<sub>3</sub>F<sub>6</sub>)<sub>4</sub>)]<sup>+</sup>: 187.03090, found 187.03064

**HRMS** (ESI, negative) *m/z* calc'd for [M- C<sub>12</sub>H<sub>8</sub>Cl]<sup>-</sup>: 863.06488; found 863.06568.

## 2.1 High resolution mass spectrometry traces

### Compound 16

- Positive mode

1\_20210618133503 #1-282 RT: 0.01-1.50 AV: 282 NL: 5.01E9  
T: FTMS + p ESI Full ms [133.4000-2000.0000]

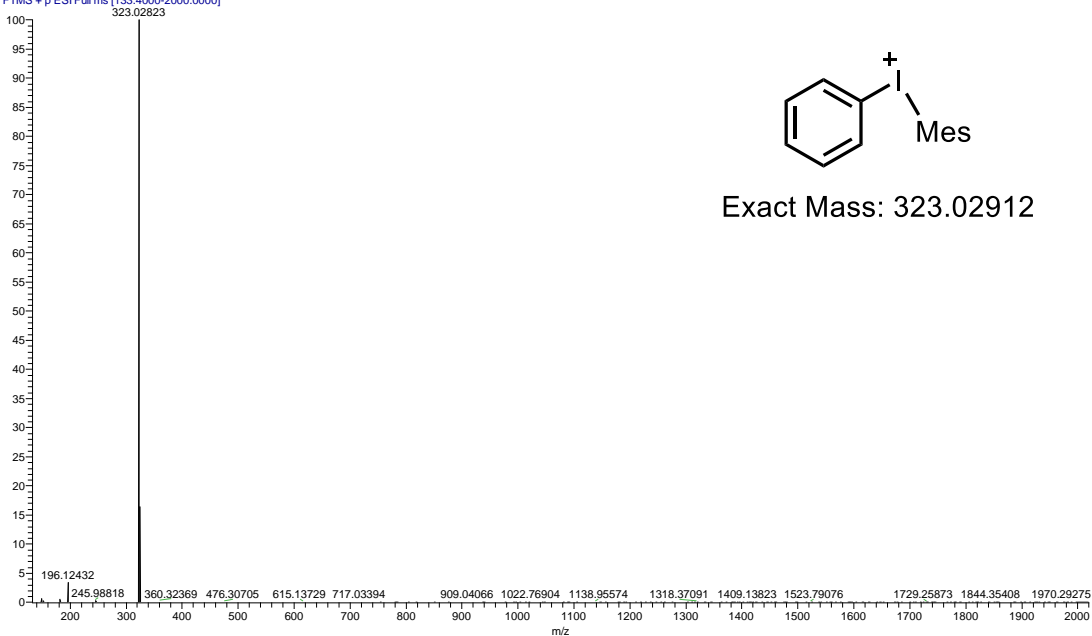

- Negative mode

2\_20210618133824 #1-284 RT: 0.00-1.50 AV: 284 NL: 2.16E9  
T: FTMS - p ESI Full ms [133.4000-2000.0000]

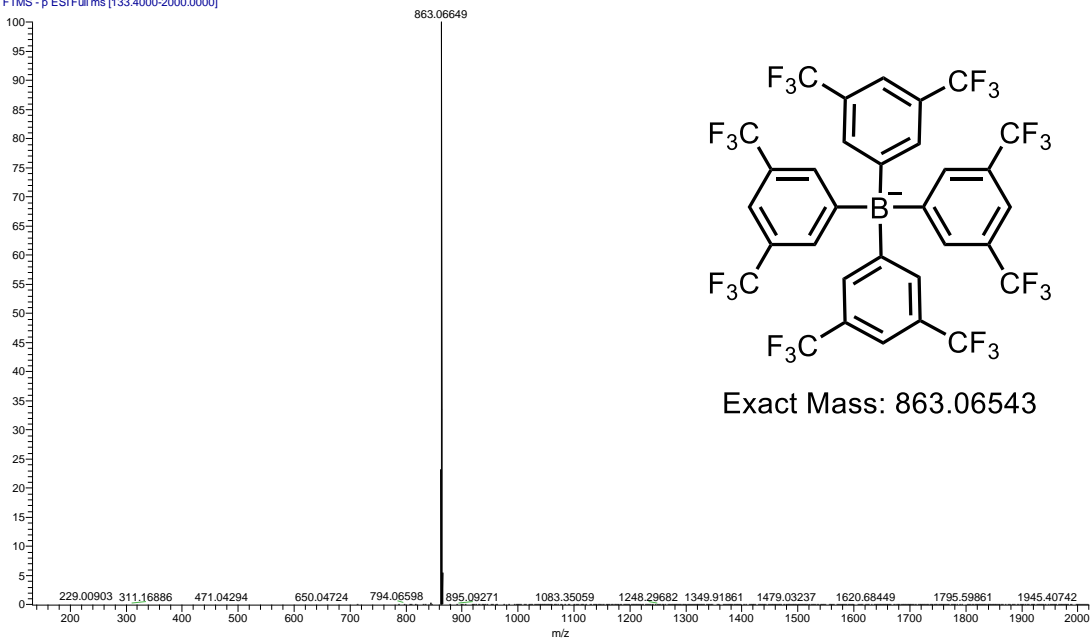

## Compound 17

- Positive mode

2 #1-284 RT: 0.01-1.50 AV: 284 NL: 8.70E8  
T: FTMS + p ESI Full ms [133.4000-2000.0000]

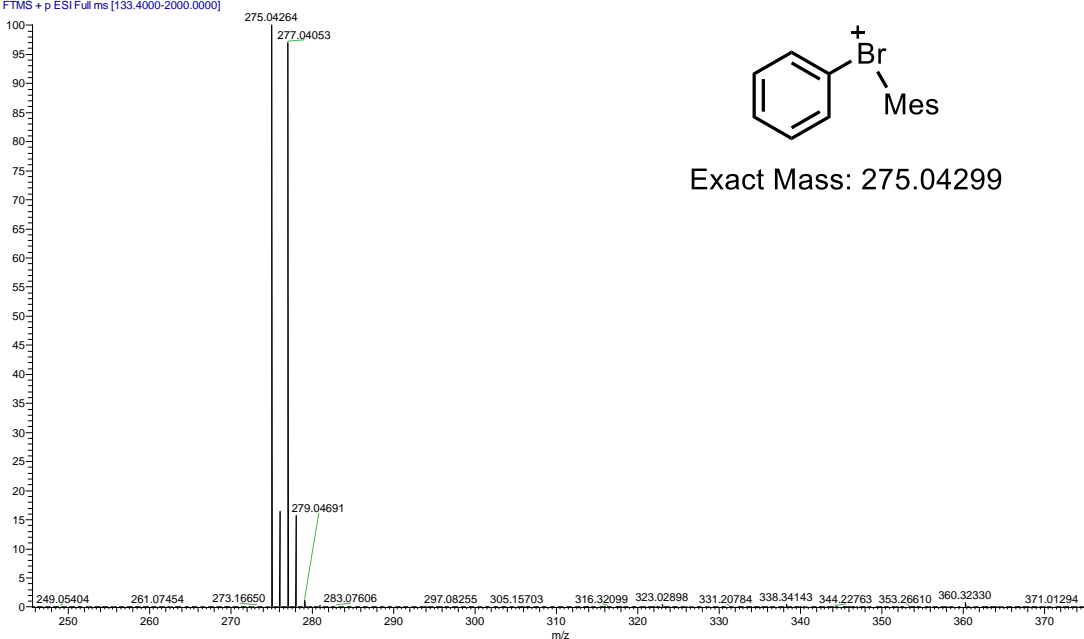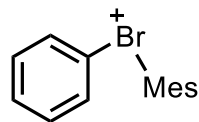

Exact Mass: 275.04299

- Negative mode

6 #1-280 RT: 0.00-1.50 AV: 280 NL: 1.18E9  
T: FTMS - p ESI Full ms [133.4000-2000.0000]

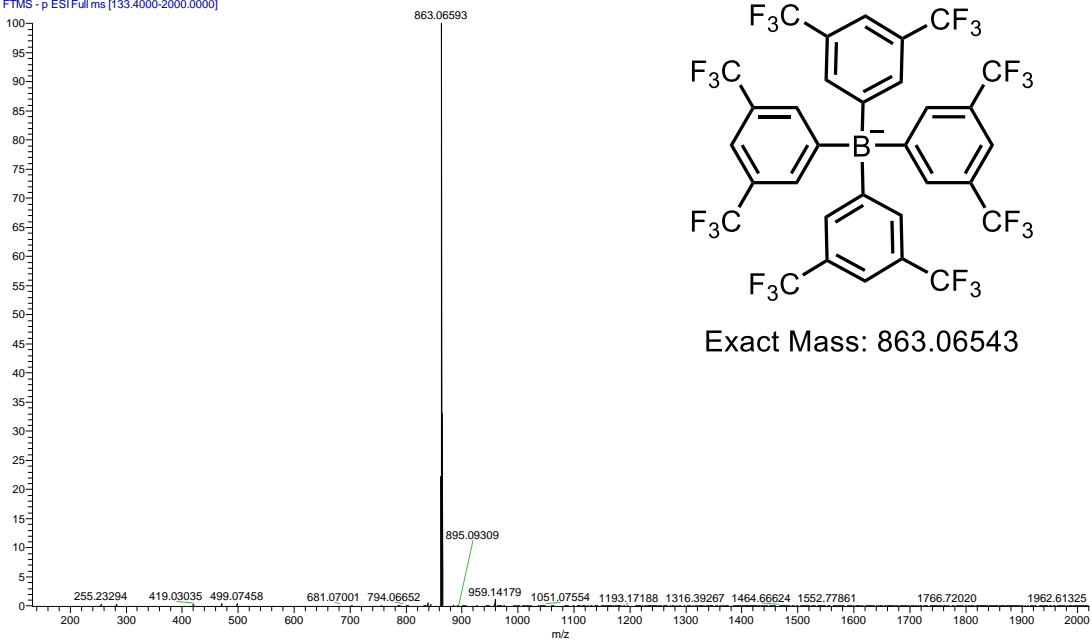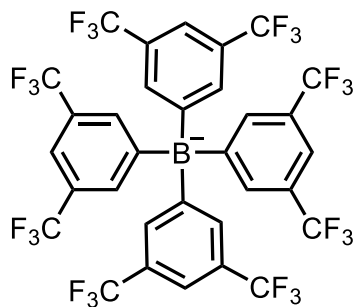

Exact Mass: 863.06543

## Compound 18

### • Positive mode

1 #1-283 RT: 0.01-1.50 AV: 283 NL: 1.23E9  
T: FTMS + p ESI Full ms [133.4000-2000.0000]

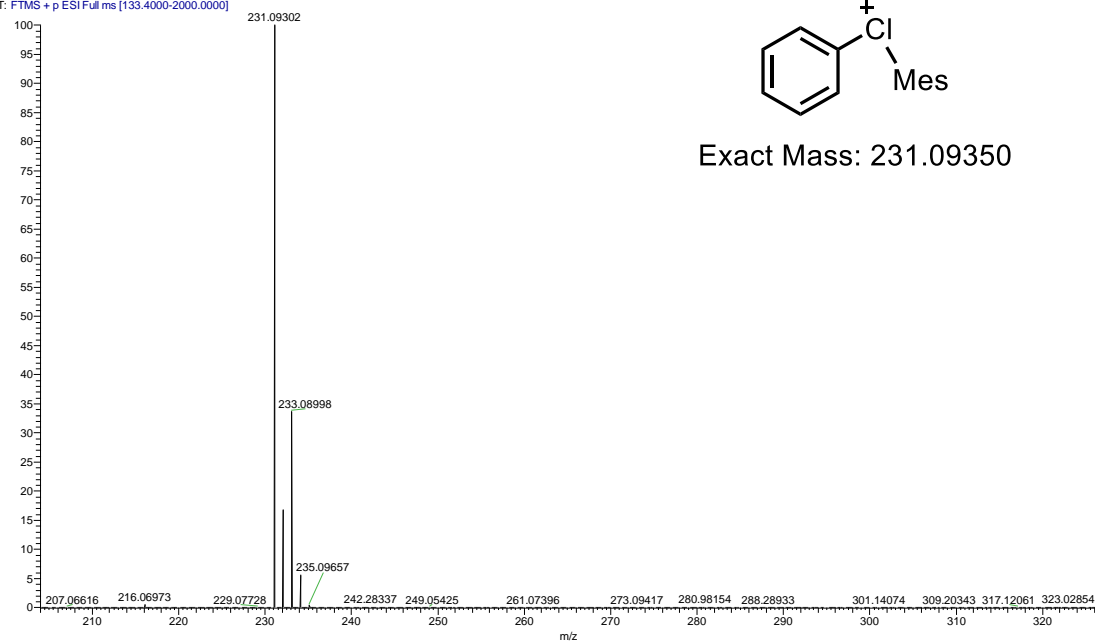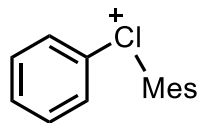

Exact Mass: 231.09350

### • Negative mode

5 #1-281 RT: 0.00-1.50 AV: 281 NL: 1.36E9  
T: FTMS - p ESI Full ms [133.4000-2000.0000]

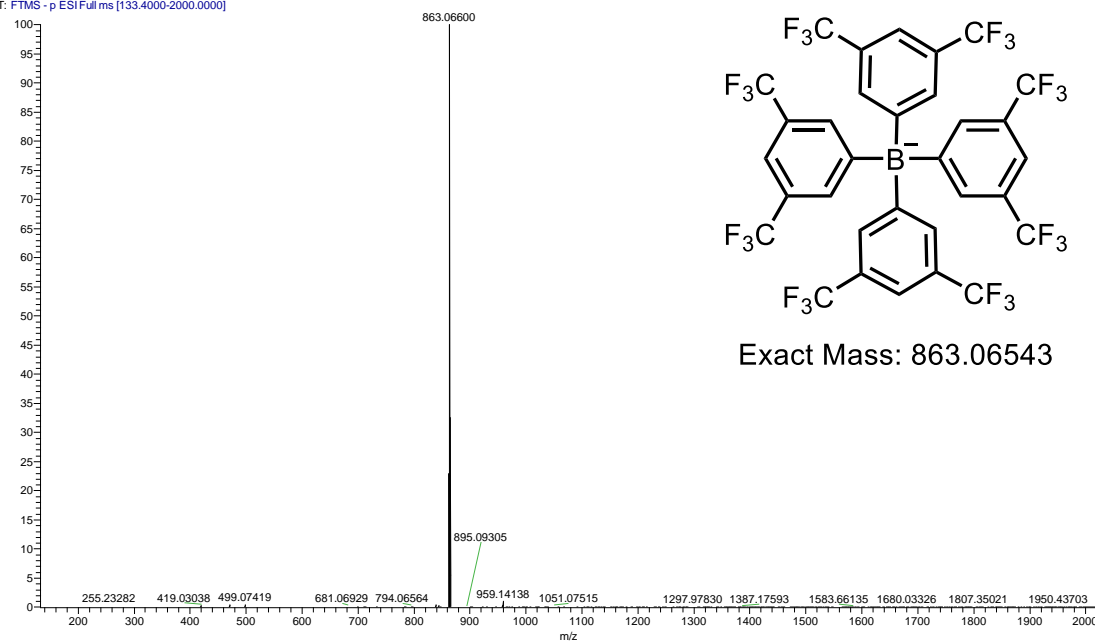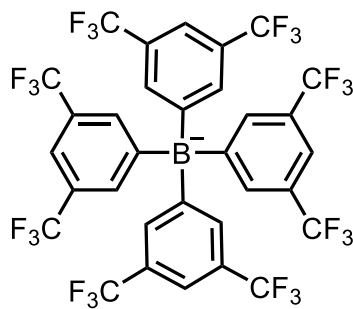

Exact Mass: 863.06543

## Compound 19

- Positive mode

HRMS- for compound 19

NJ\_MS\_22042010\_PyridiniumBArF\_20220420181518 #1-286 RT: 0.00-1.50 AV: 286 NL: 3.58E9  
T: FTMS + p ESI Full ms [133.4000-2000.0000]

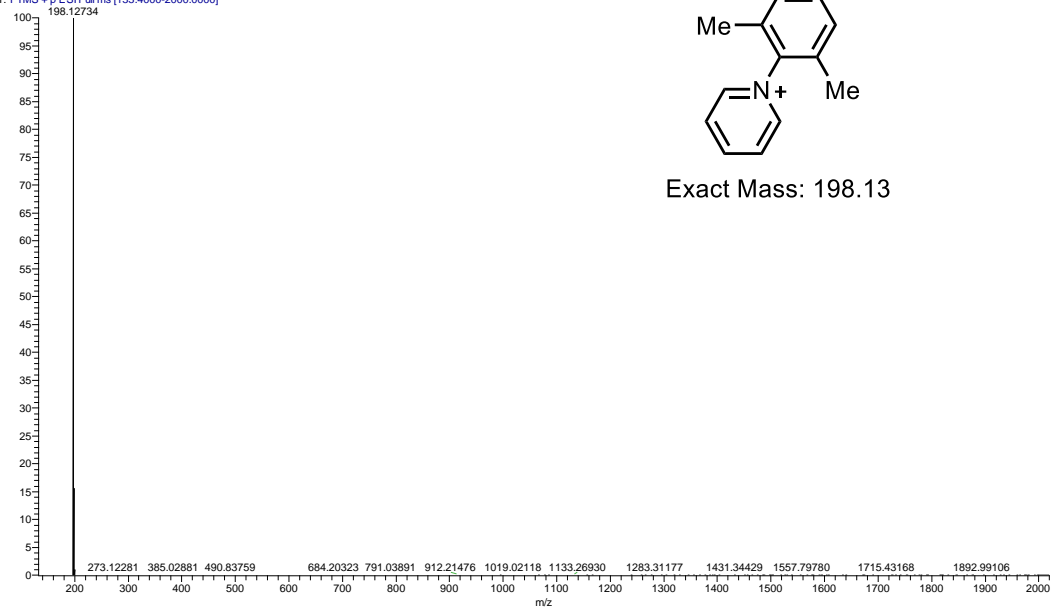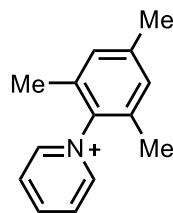

- Negative mode

NJ\_MS\_22042010\_PyridiniumBArF #1-283 RT: 0.01-1.50 AV: 283 NL: 3.40E9  
T: FTMS - p ESI Full ms [133.4000-2000.0000]

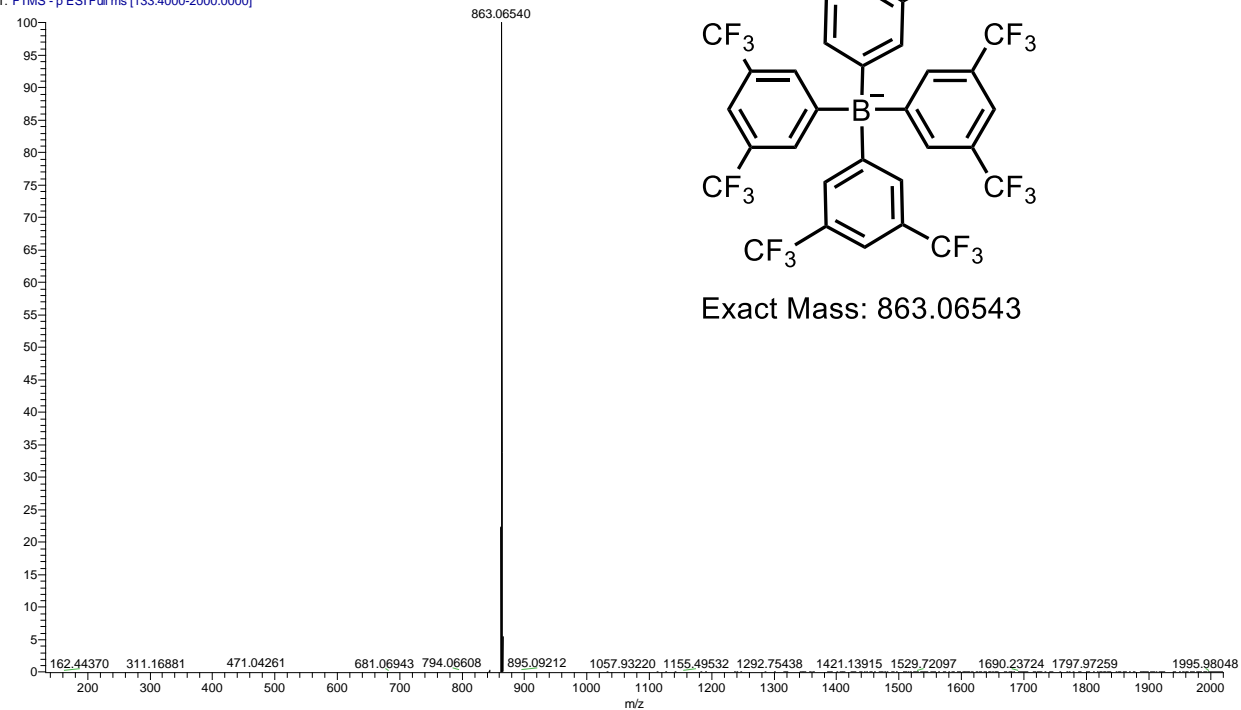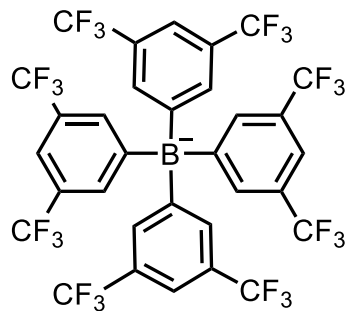

## 2.2 X-Ray diffraction data

Crystals were obtained by vapour diffusion of hexanes in DCM solution of compounds **16-18** at room temperature. Specimens were snagged with fluorocarbon oil on a nylon loop, and transferred to the goniometer which was maintained under dry dinitrogen gas [110(2) K] on a Rigaku Gemini diffractometer. Preliminary examination with MoK $\alpha$  ( $\lambda = 0.71073$  Å) radiation established the likely cell and data collection parameters.<sup>1</sup> The three salts are pseudoisomorphous, each being found in the triclinic system, P-1 (#2), and Z = 2.

| Attributes                         | Compound 16                                       | Compound 17                                        | Compound 18                                        |
|------------------------------------|---------------------------------------------------|----------------------------------------------------|----------------------------------------------------|
| <b>Molecular formula</b>           | C <sub>47</sub> H <sub>28</sub> BIF <sub>24</sub> | C <sub>47</sub> H <sub>28</sub> BBrF <sub>24</sub> | C <sub>47</sub> H <sub>28</sub> BCIF <sub>24</sub> |
| <b>System</b>                      | triclinic                                         | triclinic                                          | triclinic                                          |
| <b>Space group</b>                 | P-1 (#2)                                          | P-1 (#2)                                           | P-1 (#2)                                           |
| <b>Cell volume (Å<sup>3</sup>)</b> | 2319                                              | 2270                                               | 2259                                               |
| <b>Appearance</b>                  | Yellow prisms                                     | Colourless prisms                                  | Colourless prisms                                  |
| <b>Cell constants</b>              |                                                   |                                                    |                                                    |
| <b>a (Å)</b>                       | 12.5291(7)                                        | 12.4957(7)                                         | 12.4688(8)                                         |
| <b>b (Å)</b>                       | 12.8808(8)                                        | 12.7882(9)                                         | 12.8052(7)                                         |
| <b>c (Å)</b>                       | 15.7078(9)                                        | 15.4855(8)                                         | 15.4127(8)                                         |
| <b><math>\alpha</math> (°)</b>     | 79.342(5)                                         | 79.453(5)                                          | 79.663(5)                                          |
| <b><math>\beta</math> (°)</b>      | 83.823(5)                                         | 83.941(5)                                          | 83.931(5)                                          |
| <b><math>\gamma</math> (°)</b>     | 68.734(5)                                         | 69.043(6)                                          | 69.083(5)                                          |
| <b>CCDC deposition number</b>      | 2124114                                           | 2124113                                            | 2124112                                            |

Crystals of **16** are invariably non-merohedral twins, with two major contributing domains; these could be satisfactorily disentangled during structure determination and the combined and non-overlapped data used in refinement. Structures were determined with the SHELX programs.<sup>2,3</sup> Models included positions and anisotropic libration factors for all non-H atoms. H-atoms were placed at calculated positions and included isotropic libration terms equal to 150 % of the equivalent isotropic librational factors of the attached atoms. Trifluoromethyl groups display considerable librational freedom around the C(aryl)-CF<sub>3</sub> axes, with at least two of the eight trifluoromethyl in each salt modelled with fluorines at trigonally disordered locations, and modeled with soft restraints and occupancy factors. Absorption corrections were applied to each data set.<sup>4</sup> Structures were satisfactorily refined to convergence.

ORTEP diagram for compound **16** (CCDC #2124114)

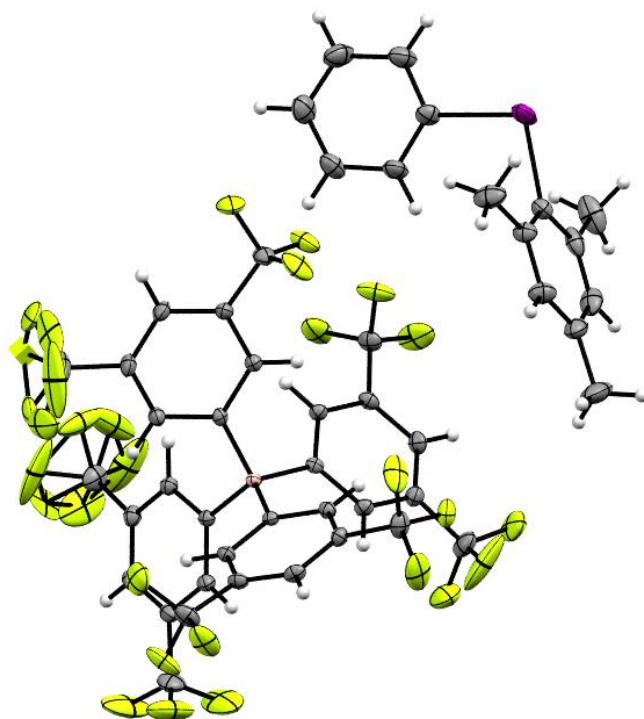

ORTEP diagram of compound **17** (CCDC #2124113)

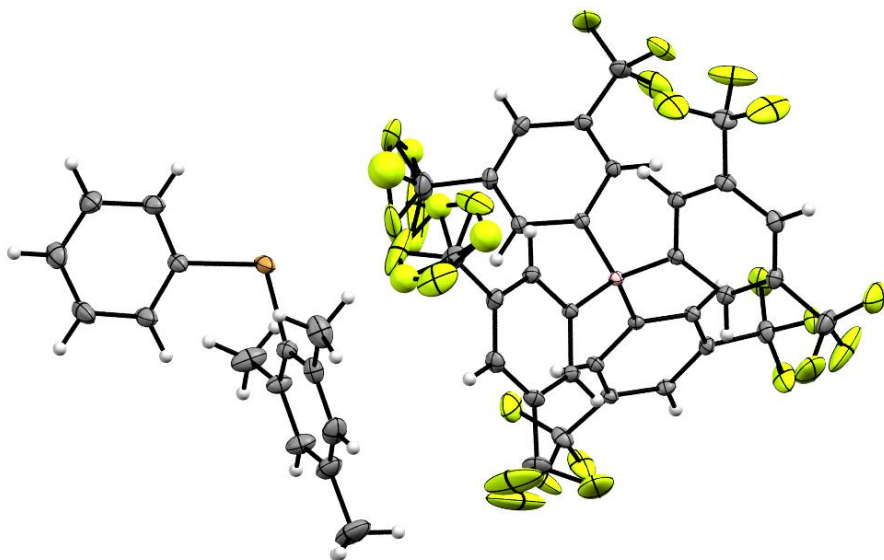



ORTEP diagram for compound **18** (CCDC #2124112)

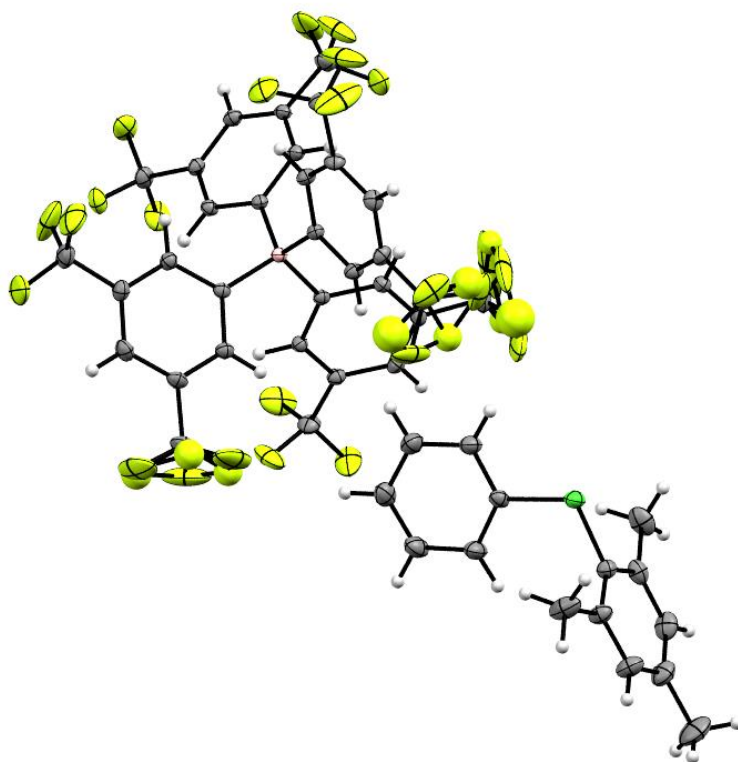

### 3. Conductivity measurements of Phenyl(Mes)halonium salts at 25 °C

Solutions of phenyl(Mes)halonium BArF salts were prepared in dichloromethane at 14 different concentrations ranging from 0-10 mM. The conductivity of these solutions were measured and the ion-pairing equilibrium determined based on the equations outlined below.

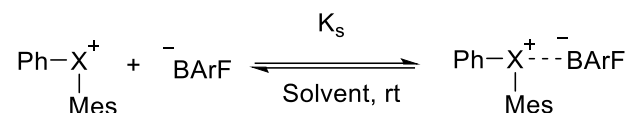

Scheme S1a: Association of phenyl(Mes)halonium BArF salts

Specific conductivity increases with increasing concentration. At dilute concentration, specific conductance ( $\kappa$ ) is directly proportional to concentration ( $c$ ) of the electrolyte (showed in eq 1). By using the linear relationship of specific conductivity and concentration determined at low concentration ( $< 0.20\text{-}0.50$  mM), the molar conductance ( $\Lambda_m$ ) of the solution of phenyl(Mes)halonium salt was determined. Using eq (2) the concentration of free  $\text{Ar}_2\text{I}^+$  ions for a given concentration of  $\text{Ar}_2\text{I}^+\text{X}^-$  was calculated. Later these data were fitted in the eq (4) to quantify the association constant ( $K_s$ ) between  $\text{Ar}_2\text{I}^+$  and  $\text{X}^-$  in different solvents.

$$\Lambda_m = \frac{\kappa}{c} \quad (1)$$

For strong electrolyte we can assume the concentration of the electrolyte is same as concentration of solvent separated ions. We are calculating  $\Lambda_m$  from the earlier portion of the data set and using this value to calculate the solvent separated ion concentration ( $c$ ) at higher concentration using eq (2), hence the measured  $K_s$  of the solution is an estimate.

$$c = [\text{Ar}_2\text{I}^+\text{X}^-]_0 = [\text{Ar}_2\text{I}^+] \quad \text{or, } c = [\text{Ar}_2\text{I}^+] = \frac{\kappa}{\Lambda_m} \quad (2)$$

$$K_s[\text{Ar}_2\text{I}^+]^2 + [\text{Ar}_2\text{I}^+] - [\text{Ar}_2\text{I}^+\text{X}^-]_0 = 0 \quad (3)$$

$$\text{or, } [\text{Ar}_2\text{I}^+] = \left[ \frac{-1 + \sqrt{1 + 4K_s[\text{Ar}_2\text{I}^+\text{X}^-]_0}}{2K_s} \right] \quad (4)$$

### 3.1 Phenyl(mesityl)iodonium tetrakis[3,5-bis(trifluoromethyl)phenyl]borate (16) in DCM

| Conc. (mM) | Conduc. (uS/cm) | Correct. Conduc. (uS/cm) |
|------------|-----------------|--------------------------|
| 9.996      | 791.7           | 791.384                  |
| 7.997      | 634.9           | 634.584                  |
| 5.998      | 500.3           | 499.984                  |
| 3.999      | 345.8           | 345.484                  |
| 2.999      | 274.9           | 274.584                  |
| 1.999      | 194.1           | 193.784                  |
| 1.000      | 113.5           | 113.184                  |
| 0.500      | 63.93           | 63.614                   |
| 0.200      | 35.58           | 35.264                   |
| 0.100      | 20.14           | 19.824                   |
| 0.050      | 11.02           | 10.704                   |
| 0.025      | 5.758           | 5.442                    |
| 0.010      | 4.392           | 4.076                    |
| 0.000      | 0.316           | 0                        |

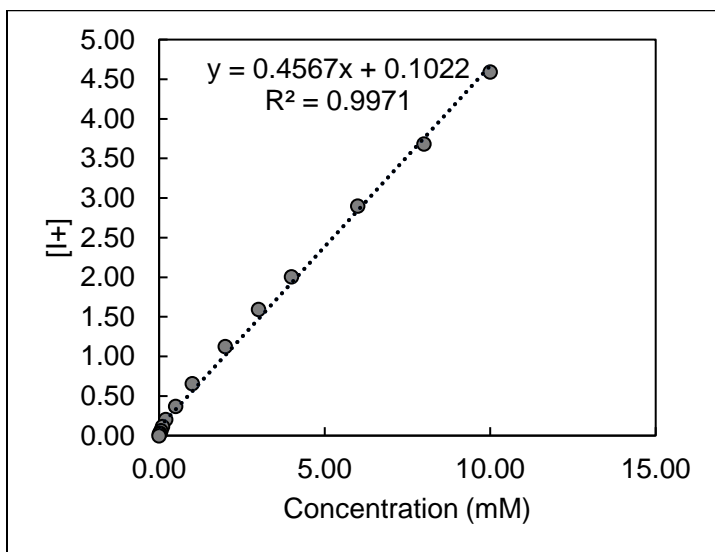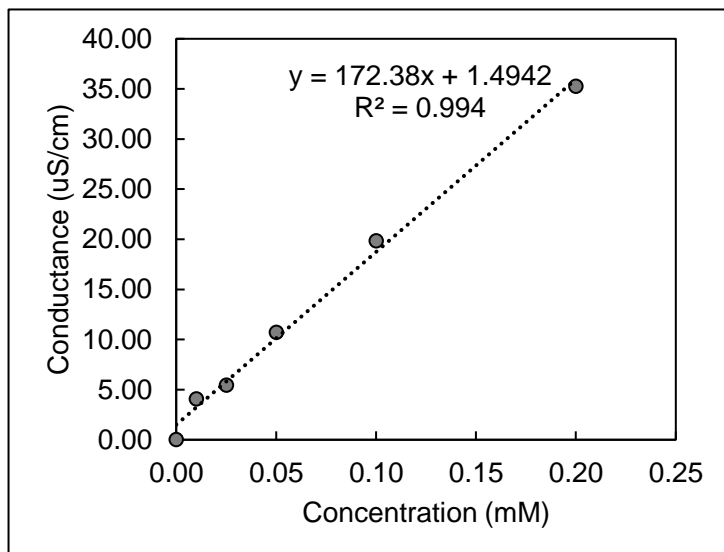

Calculated  $K_a = 3.2E+02 \text{ M}^{-1}$

### 3.2 Phenyl(mesityl)chloranium tetrakis[3,5-bis(trifluoromethyl)phenyl]borate (17) in DCM

| Conc. (mM) | Conduc. (uS/cm) | Correct. Conduc. (uS/cm) |
|------------|-----------------|--------------------------|
| 9.982      | 767.7           | 767.596                  |
| 7.985      | 622             | 621.896                  |
| 5.989      | 493.5           | 493.396                  |
| 3.993      | 354.2           | 354.096                  |
| 2.995      | 269.2           | 269.096                  |
| 1.996      | 198.9           | 198.796                  |
| 0.998      | 110.9           | 110.796                  |
| 0.499      | 63.12           | 63.016                   |
| 0.200      | 35.67           | 35.566                   |
| 0.100      | 19.97           | 19.866                   |
| 0.050      | 10.75           | 10.646                   |
| 0.025      | 5.785           | 5.681                    |
| 0.010      | 3.019           | 2.915                    |
| 0.000      | 0.104           | 0                        |

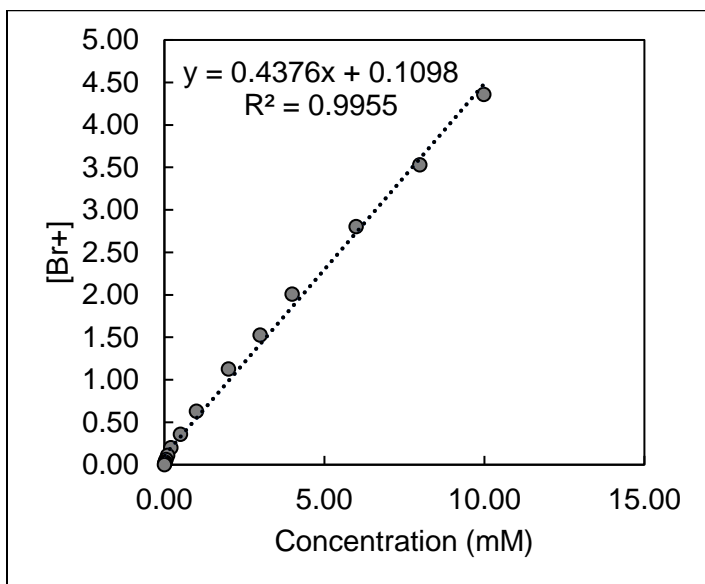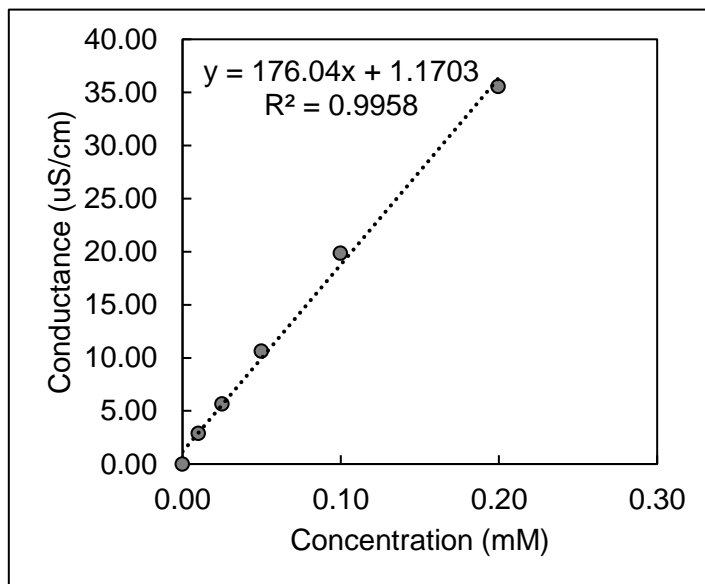

Calculated  $K_a = 3.6E+02 M^{-1}$

### 3.3 Phenyl(Mes)chloranium tetrakis[3,5-bis(trifluoromethyl)phenyl]borate (18) in DCM

| Conc. (mM) | Conduc. (uS/cm) | Correct. Conduc. (uS/cm) | [I <sup>+</sup> ] <sub>expt</sub> |
|------------|-----------------|--------------------------|-----------------------------------|
| 10.070     | 865.3           | 865.196                  | 5.786103                          |
| 8.056      | 677.5           | 677.396                  | 4.530168                          |
| 6.042      | 534.1           | 533.996                  | 3.571163                          |
| 4.028      | 370.9           | 370.796                  | 2.479743                          |
| 3.021      | 289.8           | 289.696                  | 1.937377                          |
| 2.014      | 215.8           | 215.696                  | 1.442493                          |
| 1.007      | 120             | 119.896                  | 0.801819                          |
| 0.504      | 67.37           | 67.266                   | 0.44985                           |
| 0.252      | 38.06           | 37.956                   | 0.253835                          |
| 0.126      | 20.84           | 20.736                   | 0.138675                          |
| 0.063      | 11.22           | 11.116                   | 0.07434                           |
| 0.031      | 5.959           | 5.855                    | 0.039156                          |
| 0.016      | 3.212           | 3.108                    | 0.020785                          |
| 0.000      | 0.104           | 0                        | 0                                 |

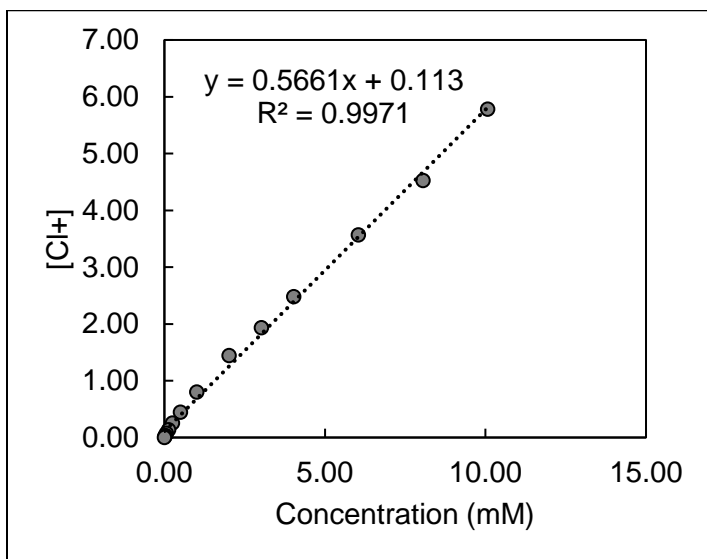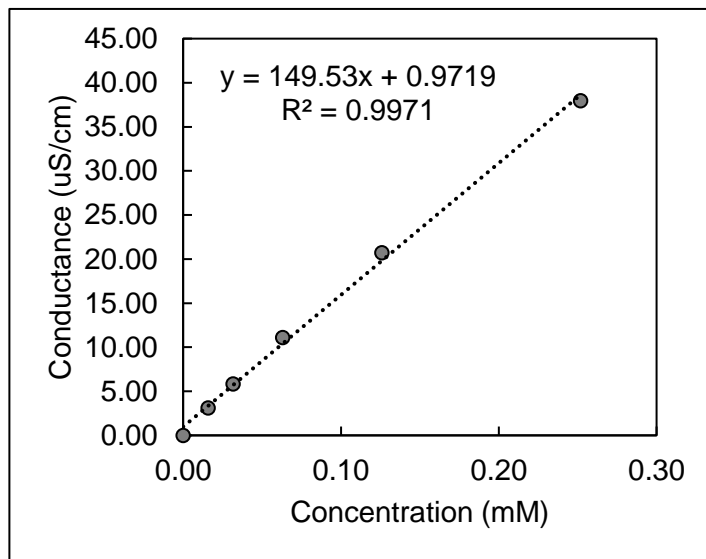

Calculated  $K_a = 1.6E+02 M^{-1}$

#### 4. Lewis-base interactions of 16-18 and 26-28 with pyridine.

Equilibrium constants for binding of compounds **16-18** and **26-28** with pyridine were conducted by NMR titration. The concentration of phenyl(Mes)halonium / dibenzo[*b,d*]halol-5-ium salts (host) were held constant (10 mM in CD<sub>2</sub>Cl<sub>2</sub> or CDCl<sub>3</sub>) and the concentration of pyridine (guest) was changed from 0 equivalences to 20 equivalences (200 mM). The chemical shift ( $\delta_{obs}$ , <sup>1</sup>H-NMR spectra) of the host was measured for each experiment and the equilibrium constant determined for a 1:1 binding model based on the equations below.

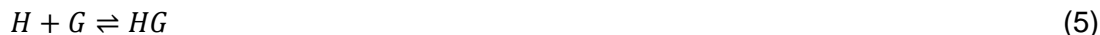

where [H] is the concentration of Host, [G] is the concentration of Guest and [HG] is the concentration of the Host-Guest adduct. If  $K_a$  is the bonding constant between the host and the guest.

$$K_a = \frac{[HG]}{[H][G]} \quad (6)$$

From mass balance following equations can be written (considering 1:1 binding):

$$[H]_0 = [H] + [HG] \quad \text{or, } [H] = [H]_0 - [HG] \quad (7)$$

$$[G]_0 = [G] + [HG] \quad \text{or, } [G] = [G]_0 - [HG] \quad (8)$$

Substituting [H]<sub>0</sub> and [G]<sub>0</sub> in eq 6:

$$K_a = \frac{[HG]}{([H]_0 - [HG])([G]_0 - [HG])}$$

$$\text{or, } [HG]^2 - [HG] \left( [H]_0 + [G]_0 + \frac{1}{K_a} \right) - [H]_0[G]_0 = 0 \quad (9)$$

Solving the quadratic eq 9:

$$[HG] = \frac{1}{2} \left[ \left( [G]_0 + [H]_0 + \frac{1}{K_a} \right) - \sqrt{\left( [G]_0 + [H]_0 + \frac{1}{K_a} \right)^2 - 4[H]_0[G]_0} \right] \quad (10)$$

In the case of NMR spectroscopy, the chemical shift observed ( $\delta_{obs}$ ) for the host is described by the sum of the individual components as a function of mole fraction ( $X_H$  or  $X_{HG}$ ) (eq 11):

$$\delta_{obs} = \delta_H X_H + \delta_{HG} X_{HG} \quad (11)$$

$$\text{where, } X_H = \frac{[H]}{[H]_0} ; X_{HG} = \frac{[HG]}{[H]_0} \text{ and } (X_H + X_{HG}) = 1$$

Eq 11 can be rearranged and rewritten as:

$$\delta_{obs} = \delta_H (1 - X_{HG}) + \delta_{HG} X_{HG}$$

$$\text{or, } (\delta_{obs} - \delta_H) = (\delta_{HG} - \delta_H) X_{HG}$$

$$\text{or, } \Delta\delta_{obs} = \delta_{max} \left( \frac{[HG]}{[H]_0} \right) \quad \text{where, } \Delta\delta_{obs} = \delta_{obs} - \delta_H \text{ and } \delta_{max} = \delta_{HG} - \delta_H$$

$$\text{or, } \Delta\delta_{obs} = \delta_{max} = \frac{1}{2} \left[ \left( [G]_0 + [H]_0 + \frac{1}{K_a} \right) - \sqrt{\left( [G]_0 + [H]_0 + \frac{1}{K_a} \right)^2 - 4[H]_0[G]_0} \right] \quad (12)$$

The binding constant between the halonium salts and pyridine was then quantified by fitting the raw data  $\Delta\delta_{\text{obs}}$  into eq (12).

4.1 Binding constant between compound 16 and pyridine in DCM-d<sub>2</sub> at room temperature.  
(Host concentration = 10 mM)

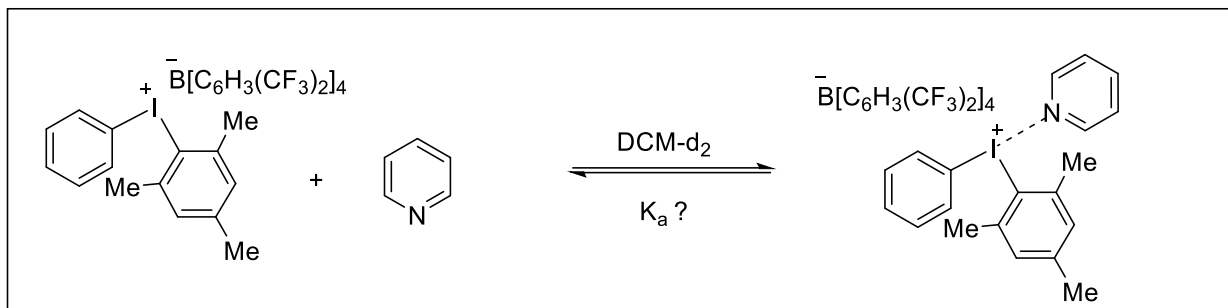

| #  | [H] <sub>o</sub> | [G] <sub>o</sub> | δ <sub>obs</sub> (ppm) | Δδ <sub>obs</sub> (ppm) |
|----|------------------|------------------|------------------------|-------------------------|
| 1  | 0.00999          | 0.00000          | 7.5318                 | 0                       |
| 2  | 0.00999          | 0.00325          | 7.5311                 | -0.0007                 |
| 3  | 0.00999          | 0.00650          | 7.5282                 | -0.0036                 |
| 4  | 0.00999          | 0.01299          | 7.5173                 | -0.0145                 |
| 5  | 0.00999          | 0.02599          | 7.5011                 | -0.0307                 |
| 6  | 0.00999          | 0.03898          | 7.4932                 | -0.0386                 |
| 7  | 0.00999          | 0.06497          | 7.4841                 | -0.0477                 |
| 8  | 0.00999          | 0.14624          | 7.4758                 | -0.056                  |
| 9  | 0.00999          | 0.21937          | 7.4687                 | -0.0631                 |
| 10 | 0.00999          | 0.29249          | 7.4631                 | -0.0687                 |
| 11 | 0.00999          | 0.36561          | 7.4584                 | -0.0734                 |
| 12 | 0.00999          | 0.43873          | 7.4554                 | -0.0764                 |

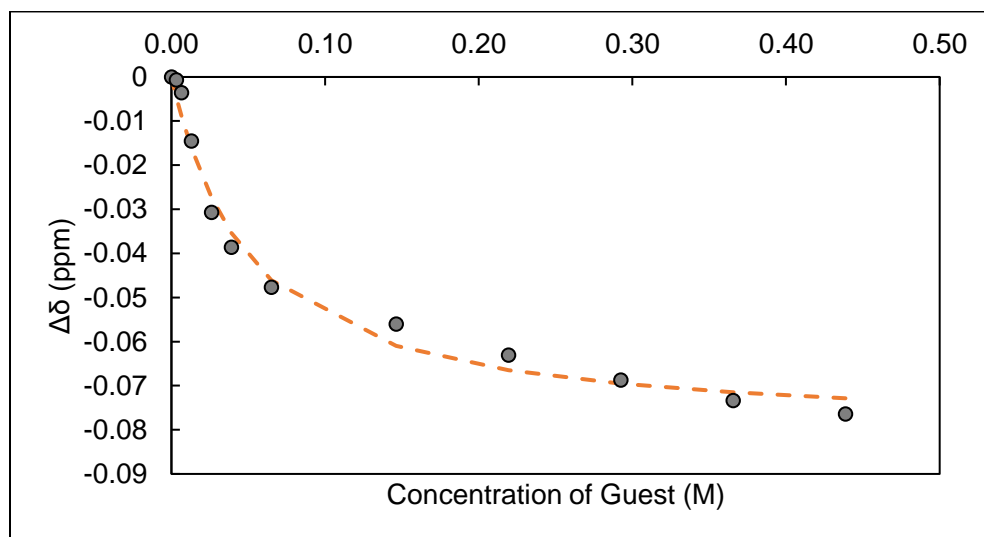

**$K_a = 22.75 \text{ M}^{-1}$**



**Stacked spectra – NMR titration of compound 16 with pyridine in DCM-d<sub>2</sub> at room temperature.**

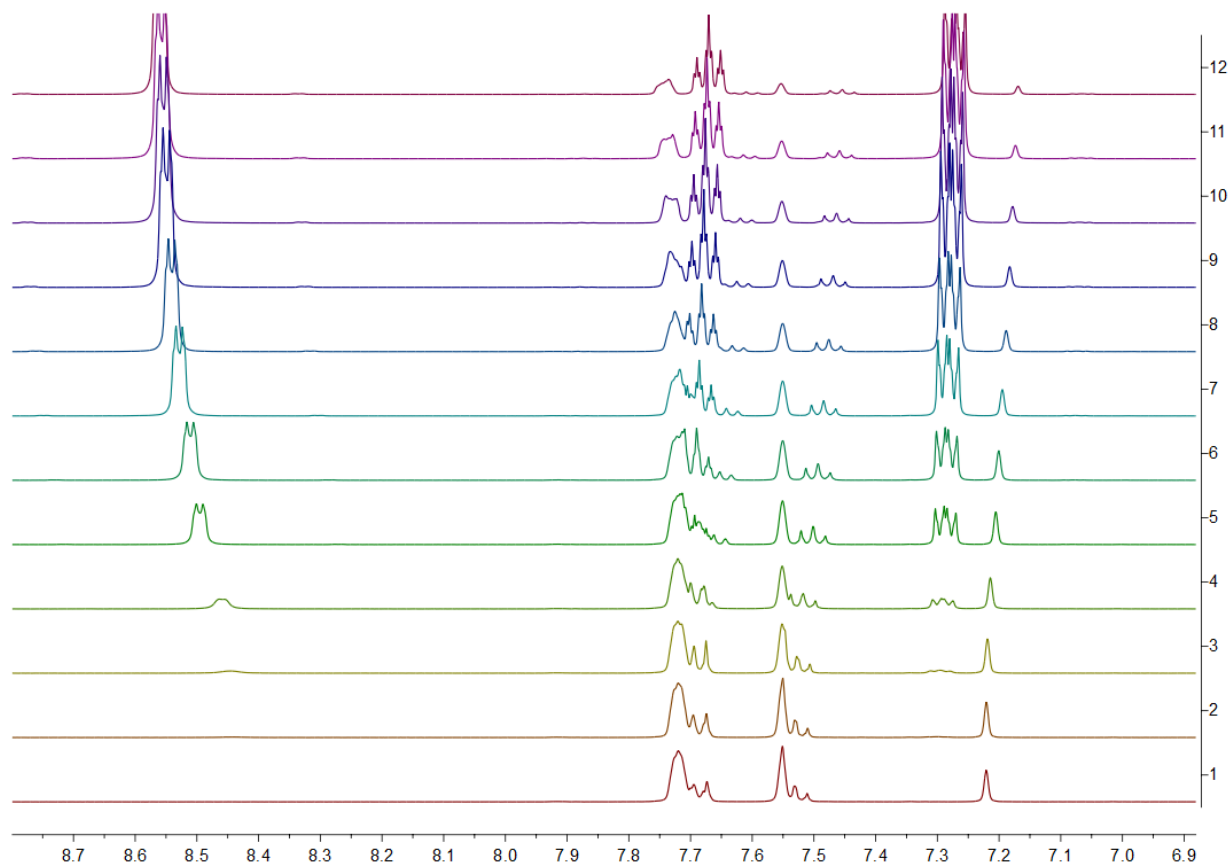

4.2 Binding constant between compound 17 and pyridine in DCM-d<sub>2</sub> at room temperature.  
(Host concentration = 10 mM)

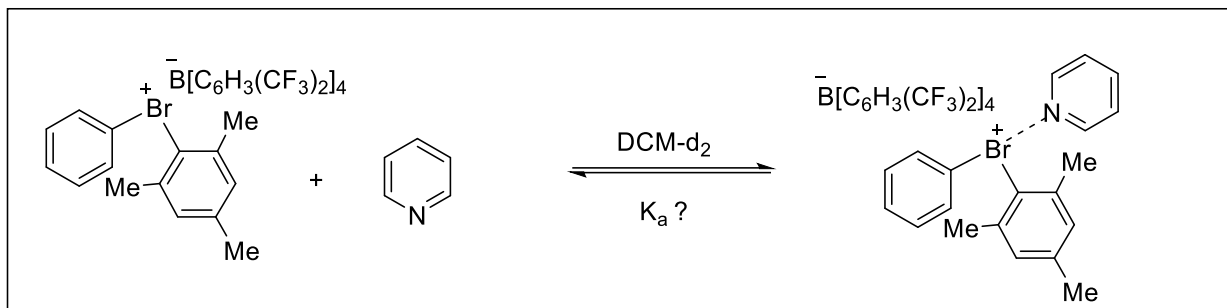

| #  | [H] <sub>o</sub> | [G] <sub>o</sub> | $\delta_{\text{obs}}$ (ppm) | $\Delta\delta_{\text{obs}}$ (ppm) |
|----|------------------|------------------|-----------------------------|-----------------------------------|
| 1  | 0.00999          | 0.00000          | 7.6424                      | 0                                 |
| 2  | 0.00999          | 0.00325          | 7.6420                      | -0.0004                           |
| 3  | 0.00999          | 0.00650          | 7.6415                      | -0.0009                           |
| 4  | 0.00999          | 0.01299          | 7.6404                      | -0.002                            |
| 5  | 0.00999          | 0.02599          | 7.6393                      | -0.0031                           |
| 6  | 0.00999          | 0.03898          | 7.6373                      | -0.0051                           |
| 7  | 0.00999          | 0.06497          | 7.6353                      | -0.0071                           |
| 8  | 0.00999          | 0.14624          | 7.6300                      | -0.0124                           |
| 9  | 0.00999          | 0.21937          | 7.6248                      | -0.0176                           |
| 10 | 0.00999          | 0.29249          | 7.6205                      | -0.0219                           |
| 11 | 0.00999          | 0.36561          | 7.6167                      | -0.0257                           |
| 12 | 0.00999          | 0.43873          | 7.6128                      | -0.0296                           |

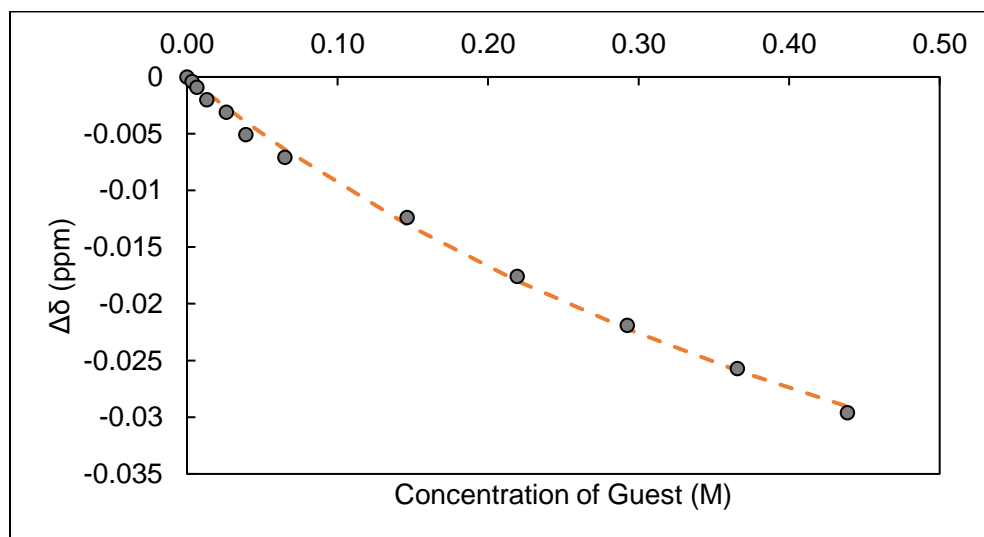

$K_a = 1.45 \text{ M}^{-1}$

**Stacked spectra – NMR titration of compound 17 with pyridine in DCM-d<sub>2</sub> at room temperature.**

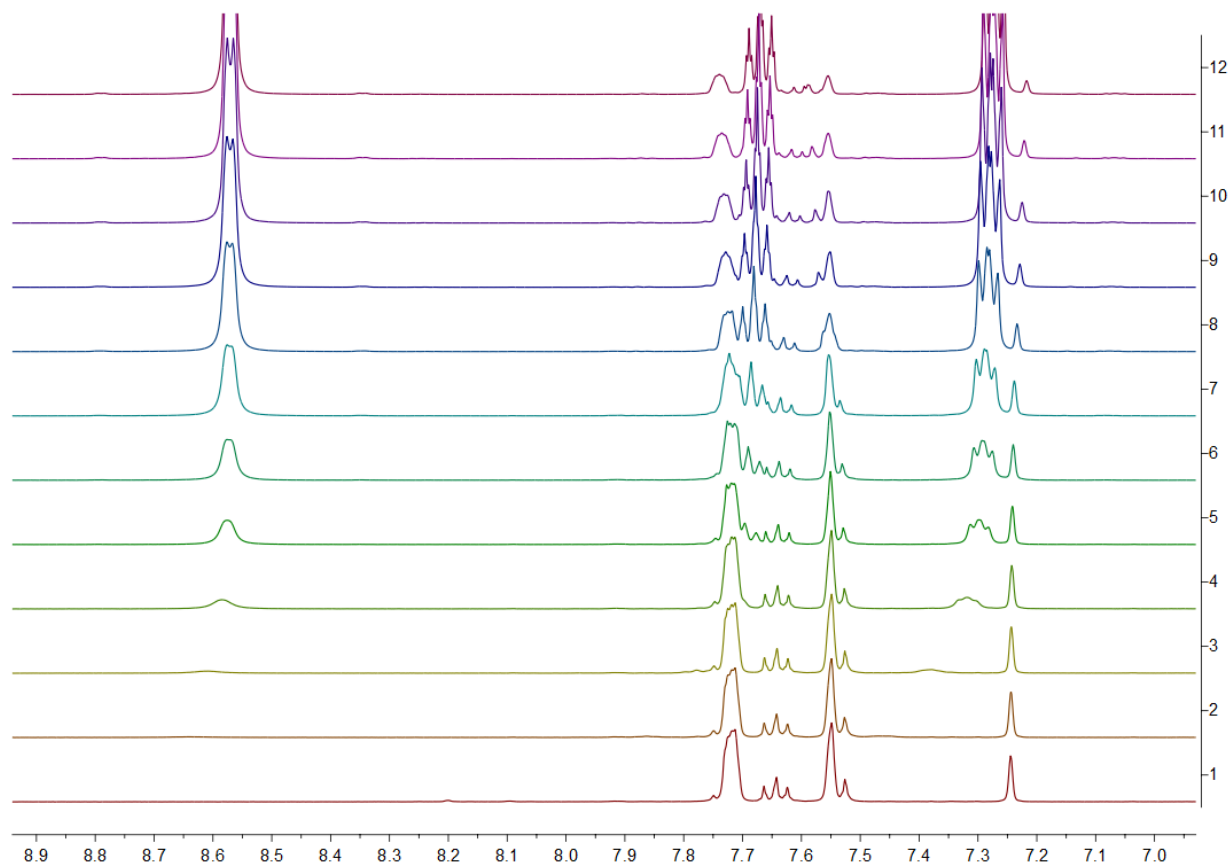

4.3 Binding constant between compound 18 and pyridine in DCM-d<sub>2</sub> at room temperature.  
(Host concentration = 10 mM)

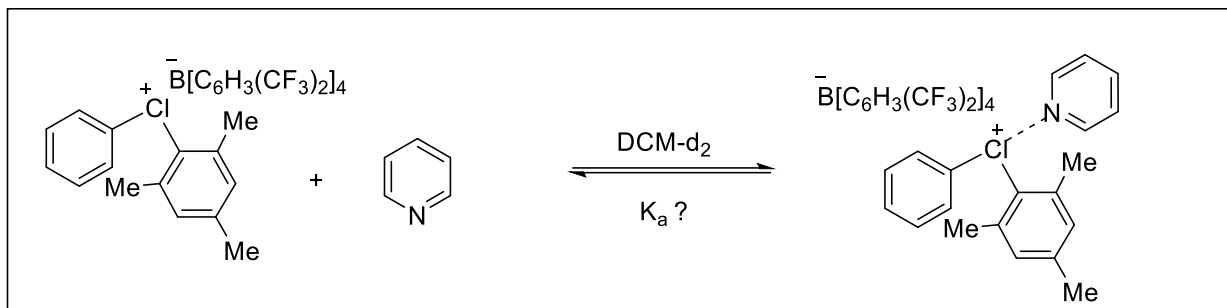

| #  | [H] <sub>0</sub> | [G] <sub>0</sub> | δ <sub>obs</sub> (ppm) | Δδ <sub>obs</sub> (ppm) |
|----|------------------|------------------|------------------------|-------------------------|
| 1  | 0.01003385       | 0                | 7.5117                 | 0                       |
| 2  | 0.01003385       | 0.003248504      | 7.5121                 | 0.0004                  |
| 3  | 0.01003385       | 0.006497008      | 7.5123                 | 0.0006                  |
| 4  | 0.01003385       | 0.012994016      | 7.5129                 | 0.0012                  |
| 5  | 0.01003385       | 0.025988032      | 7.5135                 | 0.0018                  |
| 6  | 0.01003385       | 0.038982048      | 7.5150                 | 0.0033                  |
| 7  | 0.01003385       | 0.06497008       | 7.5183                 | 0.0066                  |
| 8  | 0.01003385       | 0.146244753      | 7.5217                 | 0.0100                  |
| 9  | 0.01003385       | 0.21936713       | 7.5277                 | 0.0160                  |
| 10 | 0.01003385       | 0.292489507      | 7.5323                 | 0.0206                  |
| 11 | 0.01003385       | 0.365611884      | 7.5378                 | 0.0261                  |
| 12 | 0.01003385       | 0.43873426       | 7.5422                 | 0.0305                  |

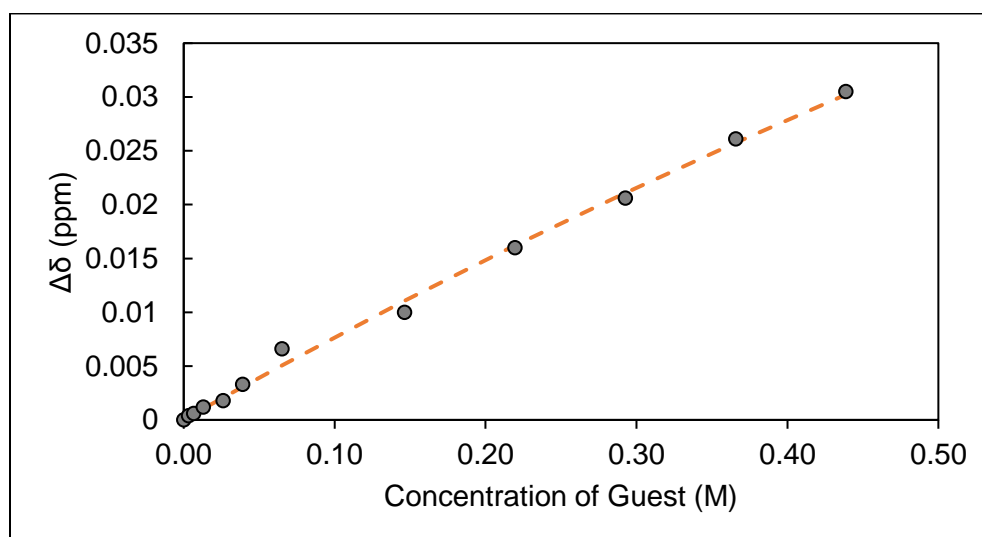

**$K_a = 0.35 \text{ M}^{-1}$**

**Stacked spectra – NMR titration of compound 18 with pyridine in DCM-d<sub>2</sub> at room temperature.**

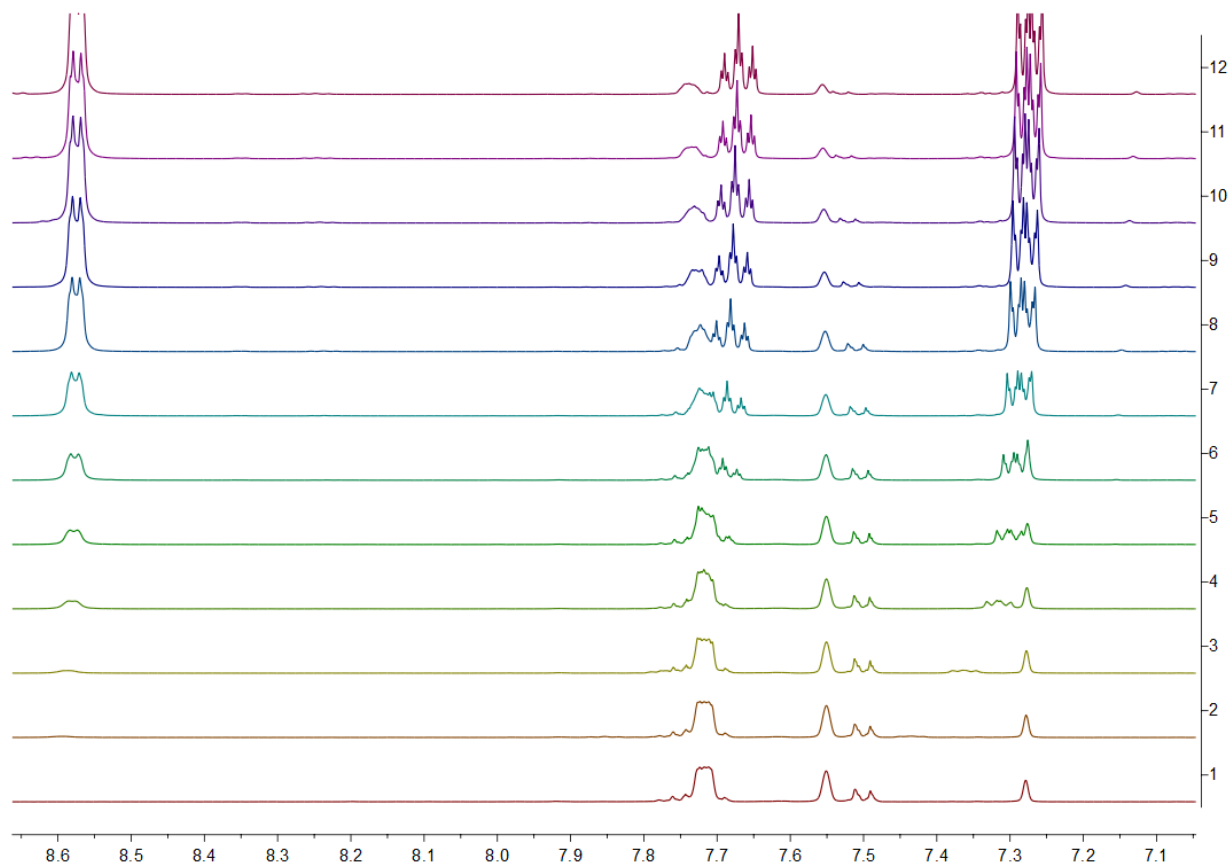

4.4 Binding constant between compound 26 and pyridine in CDCl<sub>3</sub> at room temperature.  
(Host concentration = 10 mM)

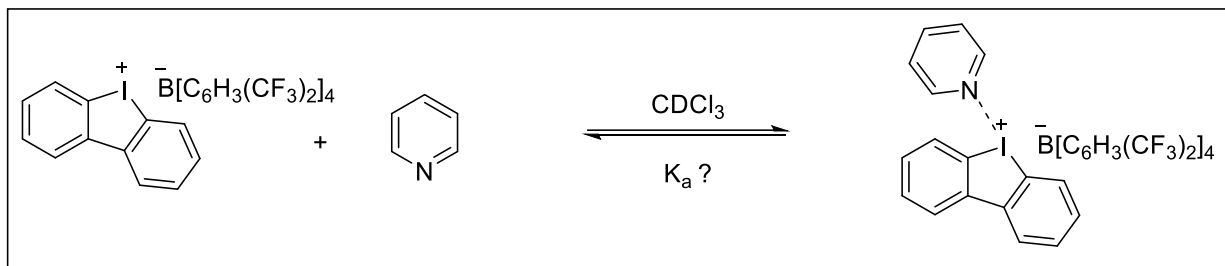

| #  | [H] <sub>0</sub> | [G] <sub>0</sub> | $\delta_{\text{obs}}$ (ppm) | $\Delta\delta_{\text{obs}}$ (ppm) |
|----|------------------|------------------|-----------------------------|-----------------------------------|
| 1  | 0.01015238       | 0                | 7.8352                      | 0                                 |
| 2  | 0.01015238       | 0.003310577      | 7.8262                      | -0.009                            |
| 3  | 0.01015238       | 0.006621155      | 7.8149                      | -0.0203                           |
| 4  | 0.01015238       | 0.013242309      | 7.8012                      | -0.034                            |
| 5  | 0.01015238       | 0.026484619      | 7.7935                      | -0.0417                           |
| 6  | 0.01015238       | 0.039726928      | 7.7901                      | -0.0451                           |
| 7  | 0.01015238       | 0.066211547      | 7.786                       | -0.0492                           |
| 8  | 0.01015238       | 0.14897598       | 7.7805                      | -0.0547                           |
| 9  | 0.01015238       | 0.22346397       | 7.7777                      | -0.0575                           |
| 10 | 0.01015238       | 0.29795196       | 7.7757                      | -0.0595                           |
| 11 | 0.01015238       | 0.372439949      | 7.7753                      | -0.0599                           |
| 12 | 0.01015238       | 0.446927939      | 7.7751                      | -0.0601                           |

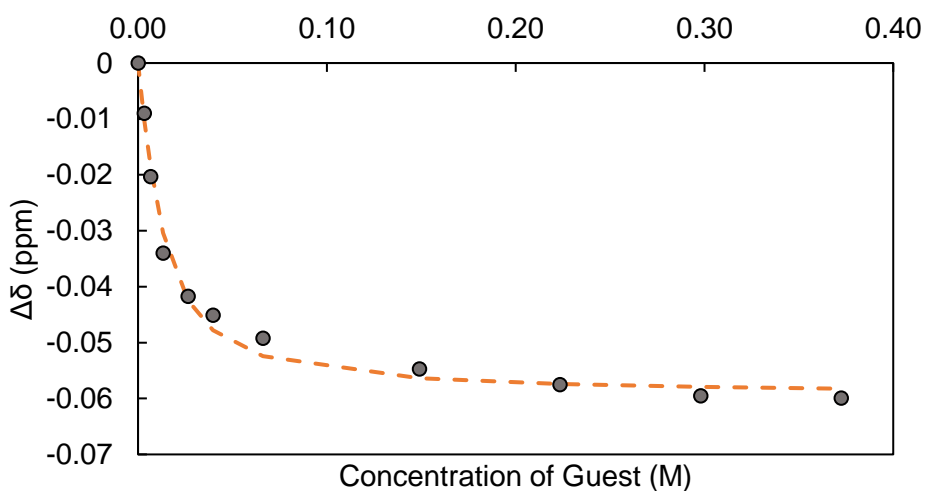

$K_a = 129.49 \text{ M}^{-1}$

**Stacked spectra – NMR titration of compound 26 with pyridine in CDCl<sub>3</sub> at room temperature.**

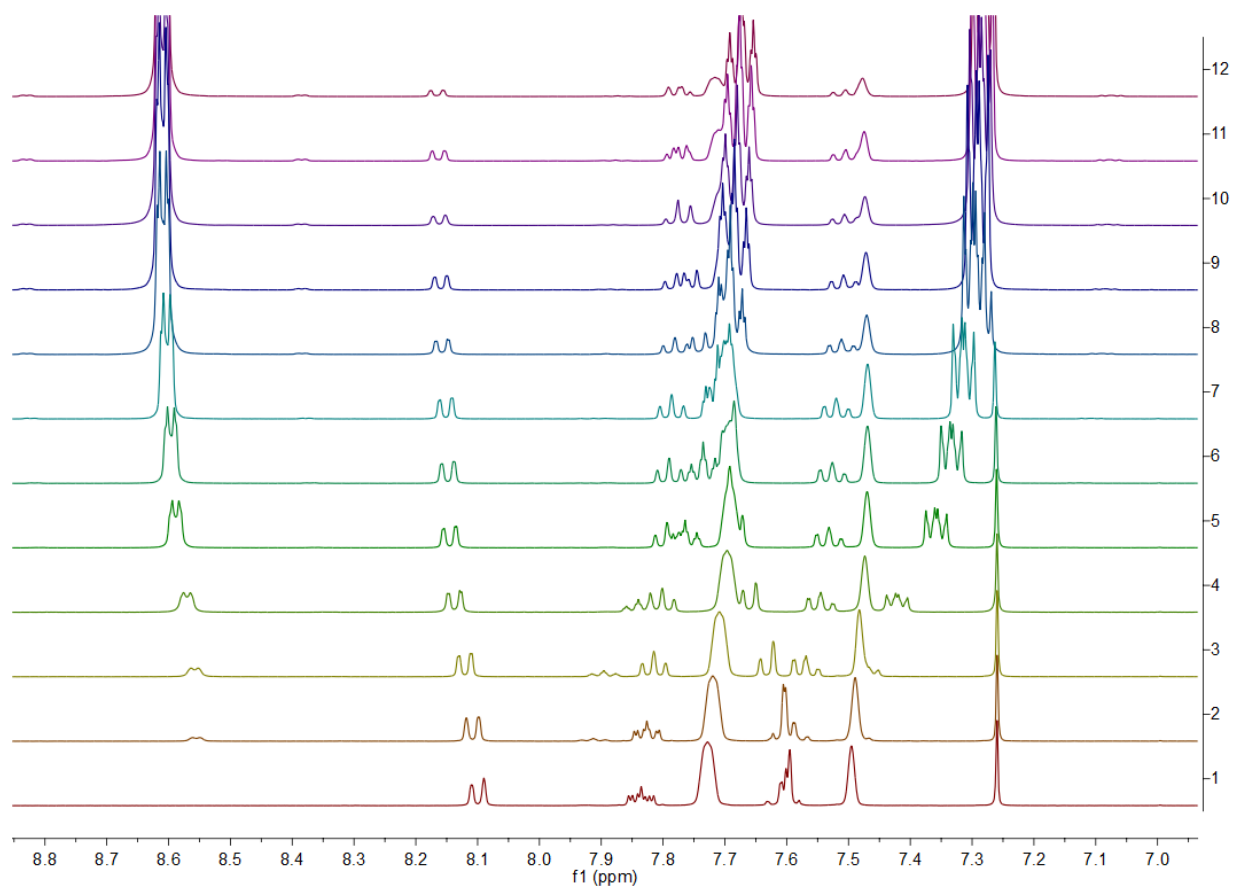

4.5 Binding constant between compound 27 and pyridine in CDCl<sub>3</sub> at room temperature.  
(Host concentration = 10 mM)

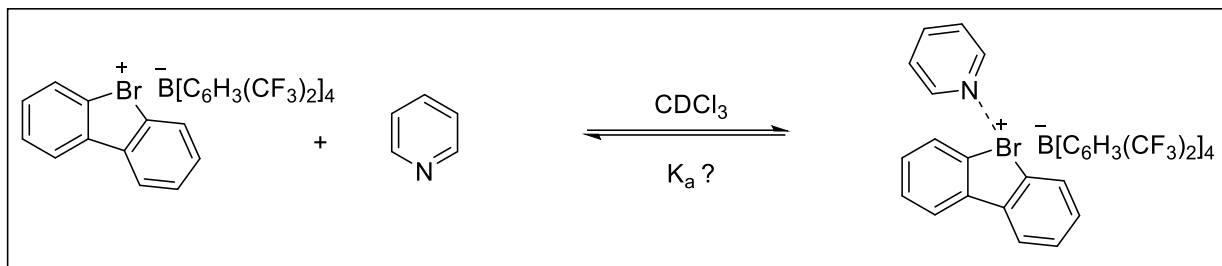

| #  | [H]o       | [G]o        | $\delta_{\text{obs}}$ (ppm) | $\Delta\delta_{\text{obs}}$ (ppm) |
|----|------------|-------------|-----------------------------|-----------------------------------|
| 1  | 0.01015238 | 0           | 7.8758                      | 0                                 |
| 2  | 0.01015238 | 0.003310577 | 7.8737                      | -0.0021                           |
| 3  | 0.01015238 | 0.006621155 | 7.8711                      | -0.0047                           |
| 4  | 0.01015238 | 0.013242309 | 7.8664                      | -0.0094                           |
| 5  | 0.01015238 | 0.026484619 | 7.8593                      | -0.0165                           |
| 6  | 0.01015238 | 0.039726928 | 7.8542                      | -0.0216                           |
| 7  | 0.01015238 | 0.066211547 | 7.8486                      | -0.0272                           |
| 8  | 0.01015238 | 0.14897598  | 7.8415                      | -0.0343                           |
| 9  | 0.01015238 | 0.22346397  | 7.8381                      | -0.0377                           |
| 10 | 0.01015238 | 0.29795196  | 7.8365                      | -0.0393                           |
| 11 | 0.01015238 | 0.372439949 | 7.8357                      | -0.0401                           |
| 12 | 0.01015238 | 0.446927939 | 7.8351                      | -0.0407                           |

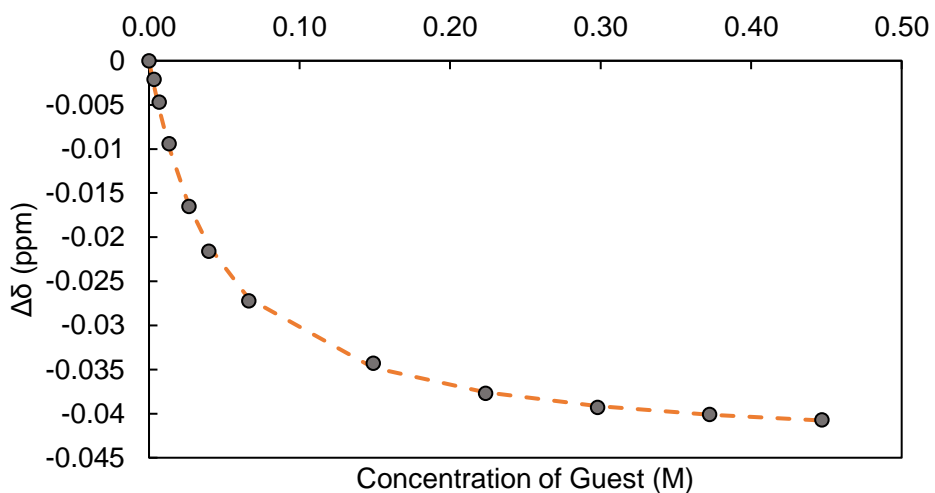

$K_a = 25.71 \text{ M}^{-1}$



**Stacked spectra – NMR titration of compound 27 with pyridine in CDCl<sub>3</sub> at room temperature.**

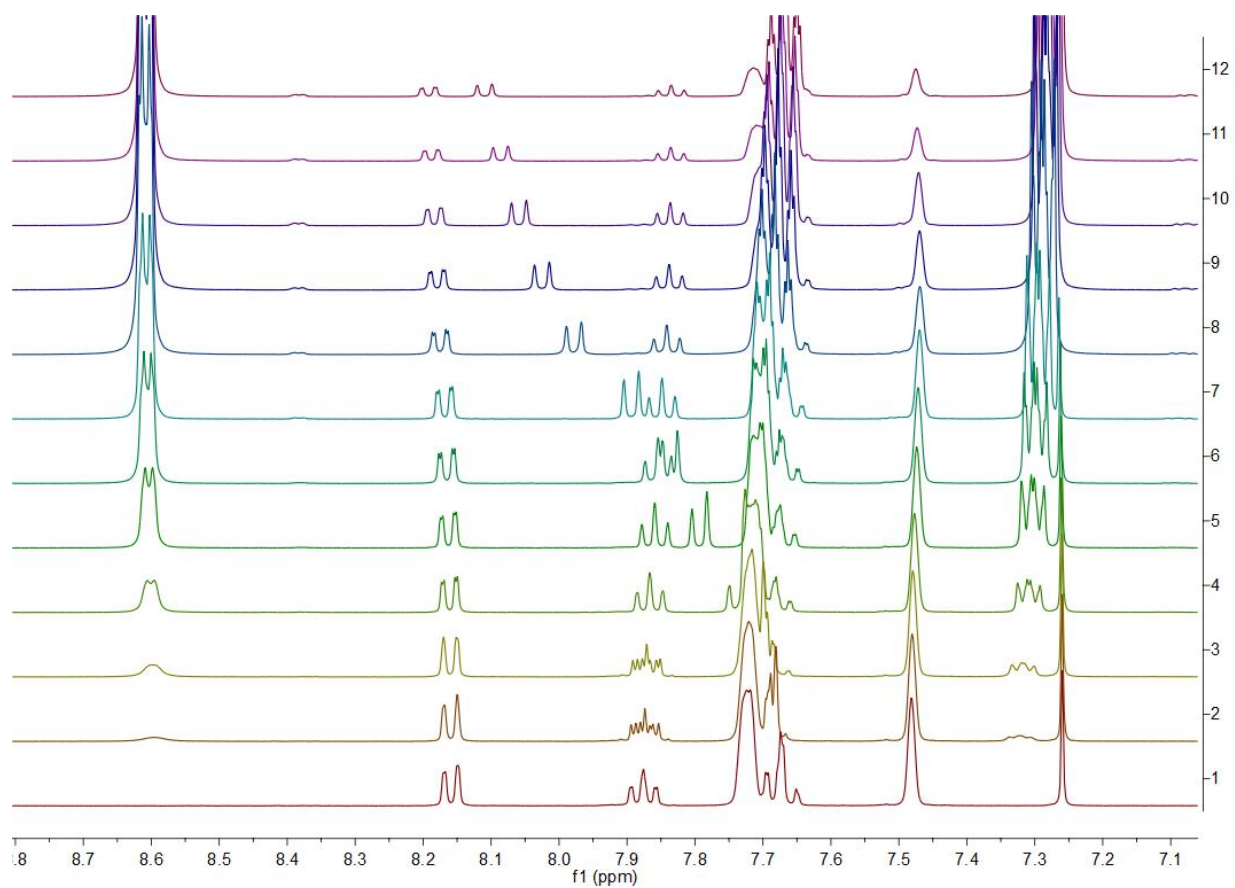

4.6 Binding constant between compound 28 and pyridine in CDCl<sub>3</sub> at room temperature.  
(Host concentration = 10 mM)

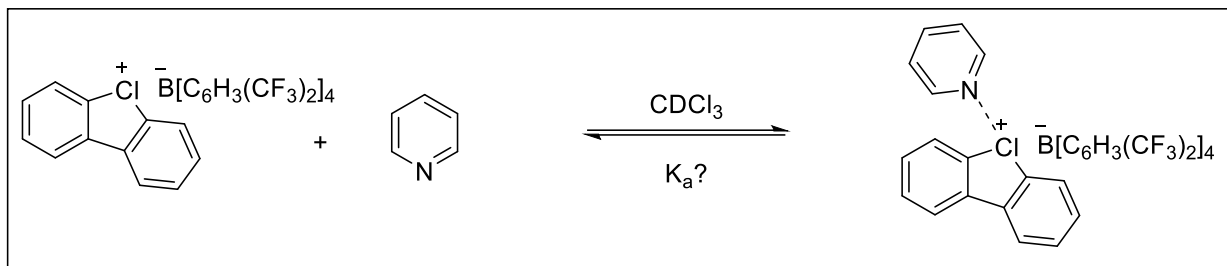

| #  | [H] <sub>0</sub> | [G] <sub>0</sub> | $\delta_{\text{obs}}$ (ppm) | $\Delta\delta_{\text{obs}}$ (ppm) |
|----|------------------|------------------|-----------------------------|-----------------------------------|
| 1  | 0.01011235       | 0                | 7.9038                      | 0                                 |
| 2  | 0.01011235       | 0.003310577      | 7.9033                      | -0.0005                           |
| 3  | 0.01011235       | 0.006621155      | 7.9027                      | -0.0011                           |
| 4  | 0.01011235       | 0.013242309      | 7.9018                      | -0.002                            |
| 5  | 0.01011235       | 0.026484619      | 7.9001                      | -0.0037                           |
| 6  | 0.01011235       | 0.039726928      | 7.8987                      | -0.0051                           |
| 7  | 0.01011235       | 0.066211547      | 7.8959                      | -0.0079                           |
| 8  | 0.01011235       | 0.14897598       | 7.8921                      | -0.0117                           |
| 9  | 0.01011235       | 0.22346397       | 7.8892                      | -0.0146                           |
| 10 | 0.01011235       | 0.29795196       | 7.8872                      | -0.0166                           |
| 11 | 0.01011235       | 0.372439949      | 7.8856                      | -0.0182                           |
| 12 | 0.01011235       | 0.446927939      | 7.8855                      | -0.0183                           |

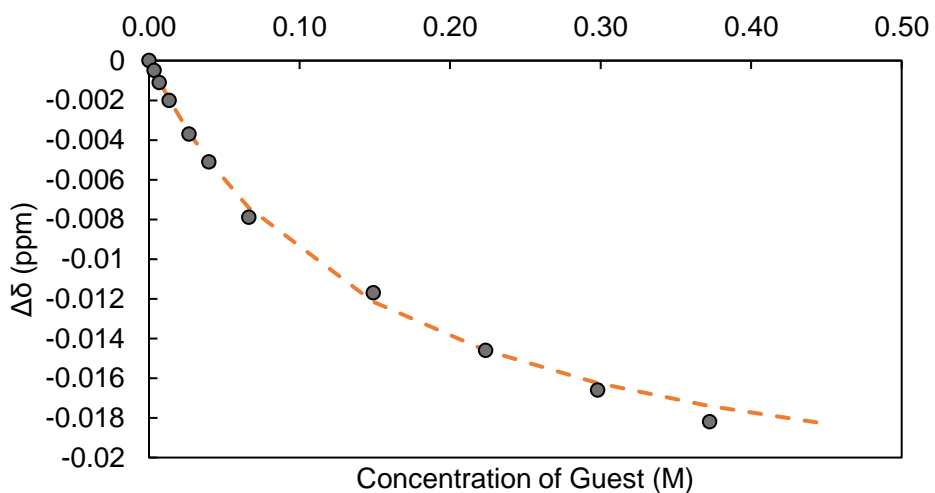

$K_a = 6.99 \text{ M}^{-1}$

**Stacked spectra – NMR titration of compound 28 with pyridine in CDCl<sub>3</sub> at room temperature.**

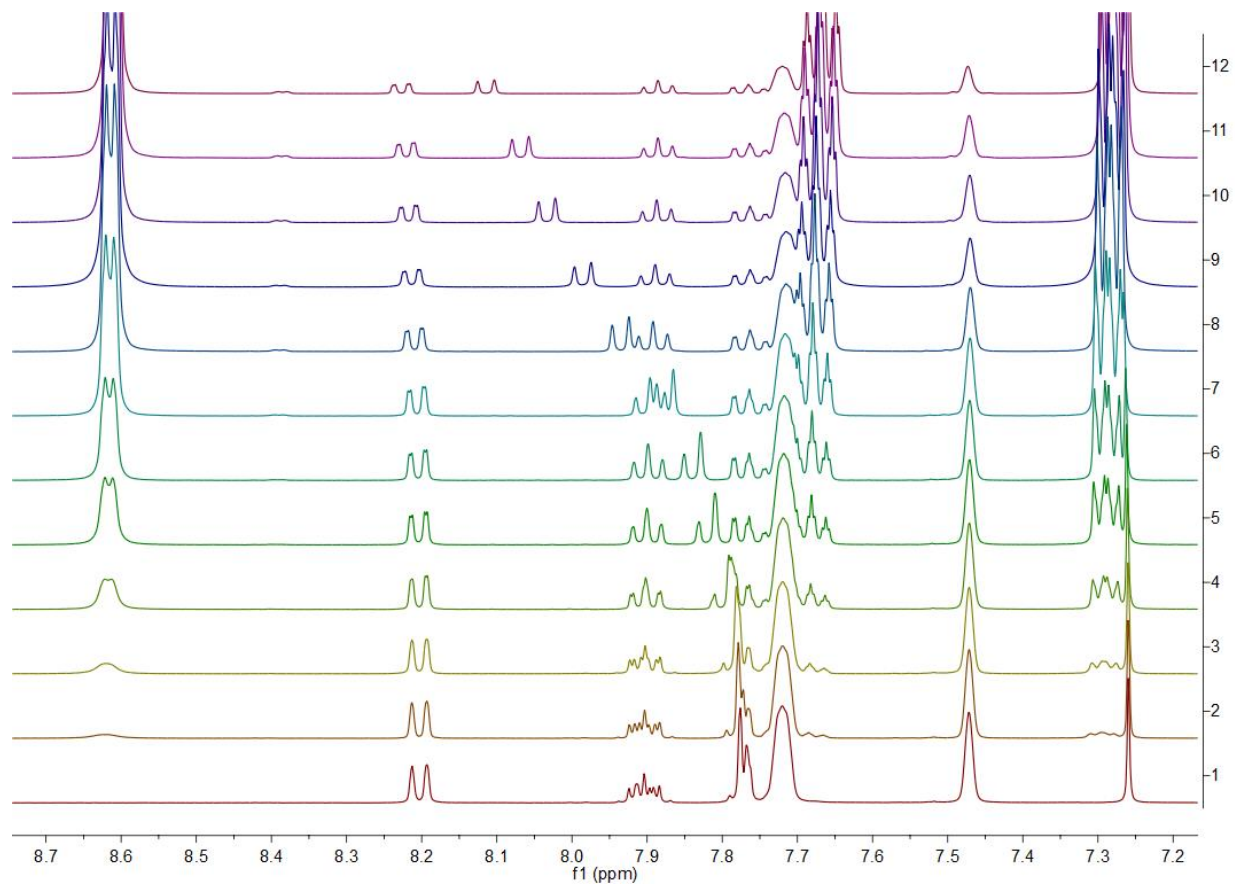

5. Figure S1: Correlation of log  $K_a$  and s-orbital character (NBO analysis) for compounds 16-18 and 26-28.

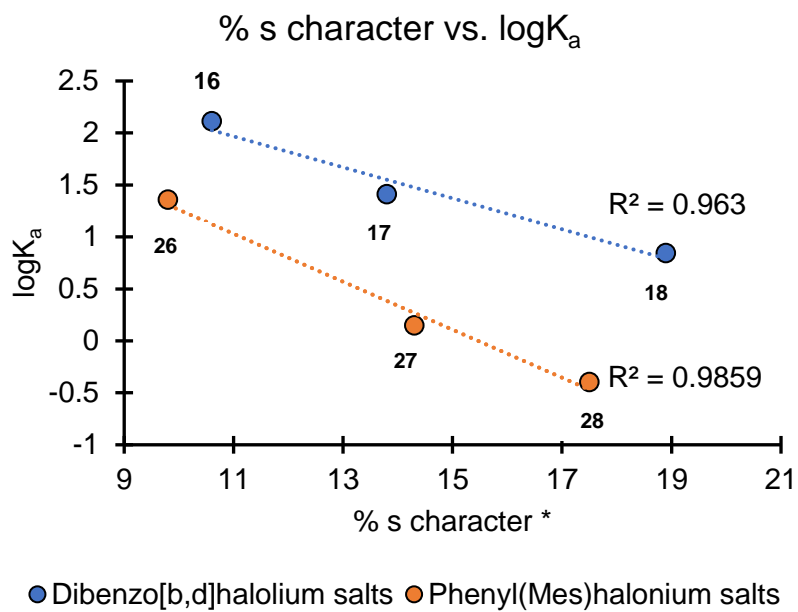

\* = The NBO analysis was performed on the corresponding  $\text{BF}_4$  salts instead of the BArF salts

## 6. Kinetic measurements of N-mesylation of pyridine using Phenyl(Mes)halonium salts.

All kinetic experiments were performed according to the procedure describe as follows:

Phenyl(Mes)halonium tetrakis[3,5-bis(trifluoromethyl)phenyl]borate salts (0.05 mmol, 1.0 equiv) were dissolved in 0.5 mL DCM-d<sub>2</sub> in a 3 mL glass vial and sealed immediately to avoid loss of solvent. To this a solution of pyridine (0.05 mmol (1.0 equiv) or 0.1 mmol (2.0 equiv)) in 0.5 mL DCM-d<sub>2</sub> was added making total volume of the mixture to 1.0 mL. An aliquot of 0.6 mL was transferred to NMR tube and the reaction was monitored by <sup>1</sup>H-NMR over a duration of 50 hours at 25 °C using ethylene carbonate as the internal standard.

### 6.1 N-Mesylation of pyridine using Phenyl(Mes)chloranium salt (0.05 M, 1.0 equiv of Pyridine).

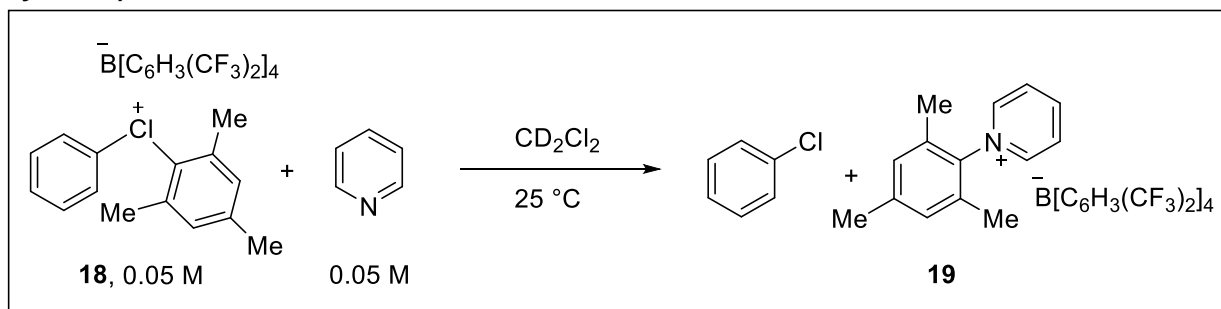

| Time (Hours) | % Yield Chloranium | % Yield Product |
|--------------|--------------------|-----------------|
| 0.10         | 98.54998           | 1.450017        |
| 0.35         | 96.69321           | 3.306787        |
| 0.60         | 95.13449           | 4.865513        |
| 0.85         | 93.83994           | 6.160056        |
| 1.10         | 92.65378           | 7.346221        |
| 1.35         | 91.2573            | 8.74270         |
| 1.60         | 90.22569           | 9.774309        |
| 1.85         | 89.54745           | 10.45255        |
| 2.10         | 88.82145           | 11.17855        |
| 2.35         | 87.3485            | 12.6515         |
| 2.60         | 86.60773           | 13.39227        |
| 2.85         | 85.32754           | 14.67246        |
| 3.10         | 84.20611           | 15.79389        |
| 3.35         | 82.78717           | 17.21283        |
| 3.60         | 81.89952           | 18.10048        |
| 4.60         | 78.942             | 21.0580         |
| 5.60         | 75.2321            | 24.7679         |
| 6.60         | 74.54819           | 25.45181        |
| 7.60         | 70.79528           | 29.20472        |
| 8.60         | 68.03661           | 31.96339        |
| 9.60         | 66.50758           | 33.49242        |
| 10.60        | 63.96534           | 36.03466        |

|       |          |          |
|-------|----------|----------|
| 11.60 | 62.46428 | 37.53572 |
| 12.60 | 61.81969 | 38.18031 |
| 13.60 | 60.19433 | 39.80567 |
| 14.60 | 57.52005 | 42.47995 |
| 15.60 | 56.55036 | 43.44964 |
| 19.60 | 52.5526  | 47.4474  |
| 23.60 | 48.55519 | 51.44481 |
| 27.60 | 46.11541 | 53.88459 |
| 31.60 | 41.58725 | 58.41275 |
| 35.60 | 39.12677 | 60.87323 |
| 39.60 | 36.84639 | 63.15361 |
| 43.60 | 34.78903 | 65.21097 |
| 47.60 | 33.49336 | 66.50664 |
| 51.60 | 33.06168 | 66.93832 |

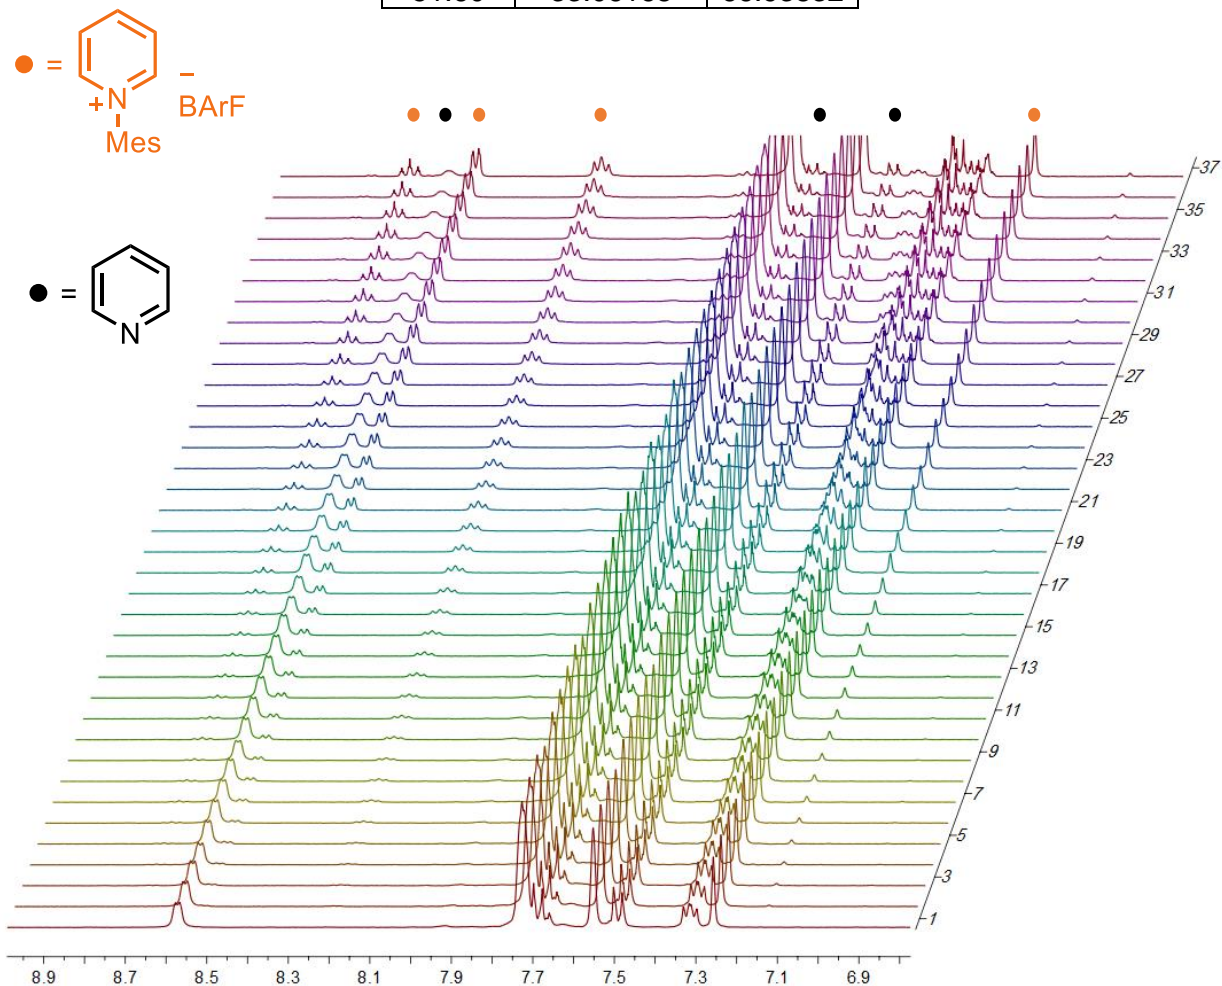

### N-mesylation of pyridine

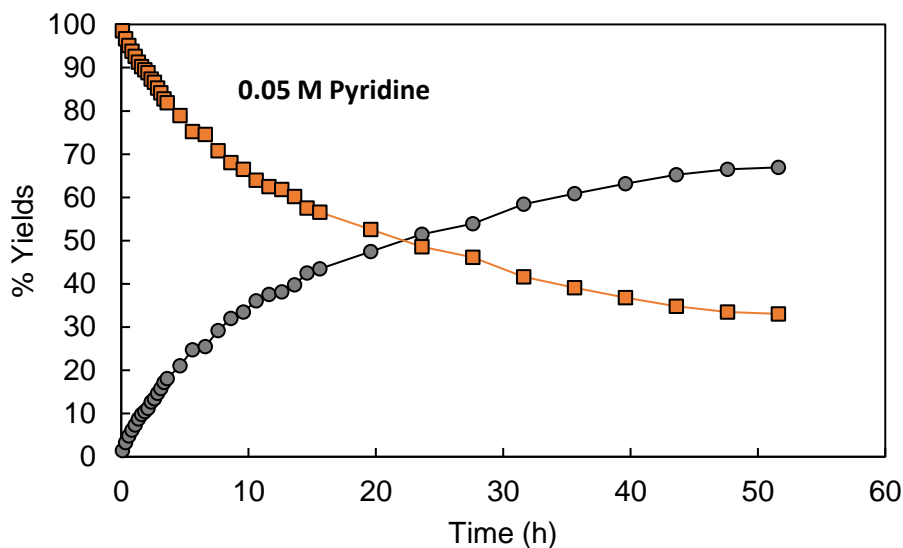

### Initial rate of N-mesylation of pyridine using 0.05M (1.0 equiv) Pyridine

| Time (s) | Product Concentration (M) |
|----------|---------------------------|
| 0        | 0                         |
| 900      | 0.001382                  |
| 1800     | 0.002433                  |
| 2700     | 0.003344                  |
| 3600     | 0.003955                  |
| 4500     | 0.004708                  |
| 5400     | 0.005269                  |
| 6300     | 0.006113                  |

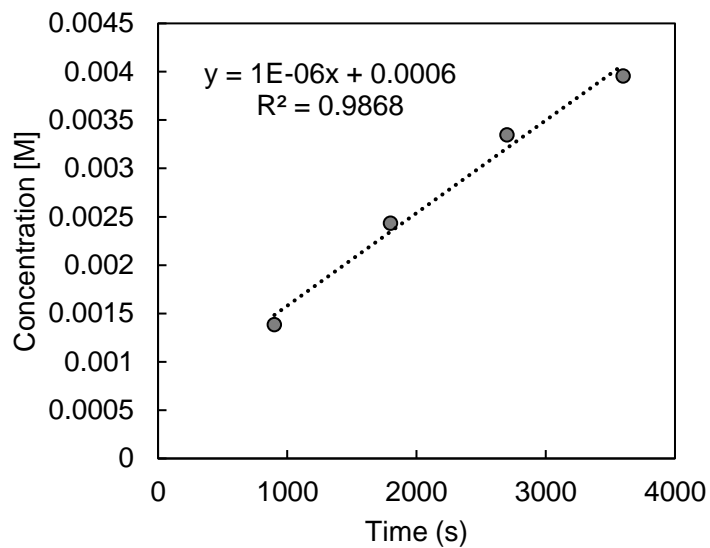

**Calculated initial rate = 1E-06 Ms<sup>-1</sup>**

**6.2 N-Mesylation of pyridine using Phenyl(Mes)chloranium salt (0.1 M, 2.0 equiv of Pyridine)**

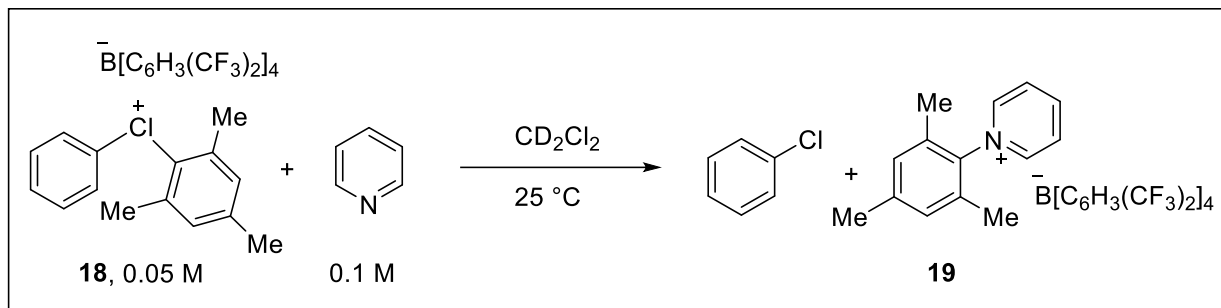

| Time (hours) | % Yield Chloranium | % Yield Product |
|--------------|--------------------|-----------------|
| 0.10         | 96.14525           | 3.854749        |
| 0.25         | 93.4488            | 6.551205        |
| 0.50         | 90.20561           | 9.794393        |
| 0.75         | 86.52404           | 13.47596        |
| 1.00         | 83.27736           | 16.72264        |
| 1.27         | 80.17917           | 19.82083        |
| 1.50         | 76.69994           | 23.30006        |
| 1.75         | 73.24396           | 26.75604        |
| 2.00         | 71.41788           | 28.58212        |
| 2.25         | 69.15395           | 30.84605        |
| 2.50         | 66.72355           | 33.27645        |
| 2.75         | 65.15005           | 34.84995        |
| 3.00         | 62.18951           | 37.81049        |
| 3.25         | 60.90267           | 39.09733        |
| 3.50         | 58.38625           | 41.61375        |
| 3.75         | 56.41638           | 43.58362        |
| 4.00         | 54.65511           | 45.34489        |
| 4.42         | 53.03173           | 46.96827        |
| 5.42         | 46.4056            | 53.5944         |
| 6.42         | 41.56502           | 58.43498        |
| 7.42         | 35.92378           | 64.07622        |
| 8.42         | 32.47528           | 67.52472        |
| 9.42         | 30.10813           | 69.89187        |
| 10.42        | 26.75487           | 73.24513        |
| 11.42        | 24.57894           | 75.42106        |
| 12.42        | 20.29009           | 79.70991        |
| 18.42        | 11.90772           | 88.09228        |
| 24.42        | 6.883721           | 93.11628        |
| 30.42        | 4.806086           | 95.19391        |
| 36.42        | 2.786033           | 97.21397        |
| 42.42        | 2.528998           | 97.471          |



|       |          |          |
|-------|----------|----------|
| 48.42 | 2.152791 | 97.84721 |
|-------|----------|----------|

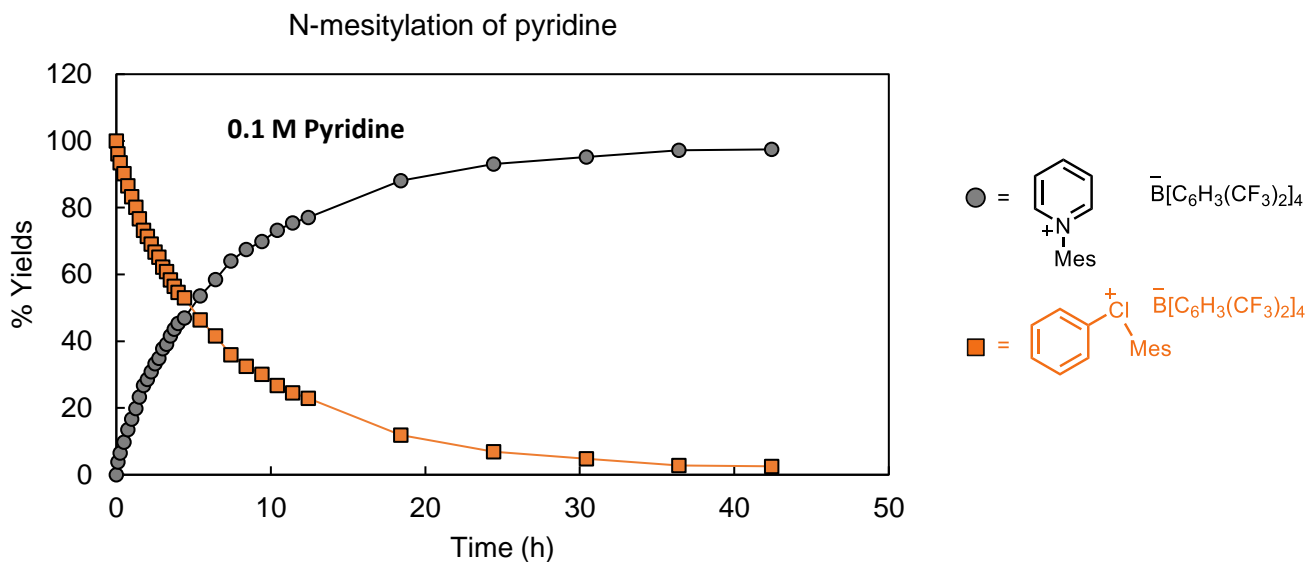

**Initial rate of N-mesylation of pyridine using 0.1M (2.0 equiv) pyridine**

| Time (s) | Product concentration (M) |
|----------|---------------------------|
| 0        | 0                         |
| 360      | 0.001927                  |
| 900      | 0.003276                  |
| 1800     | 0.004897                  |
| 2700     | 0.006738                  |
| 3600     | 0.008361                  |
| 4560     | 0.00991                   |
| 5400     | 0.01165                   |
| 6300     | 0.013378                  |

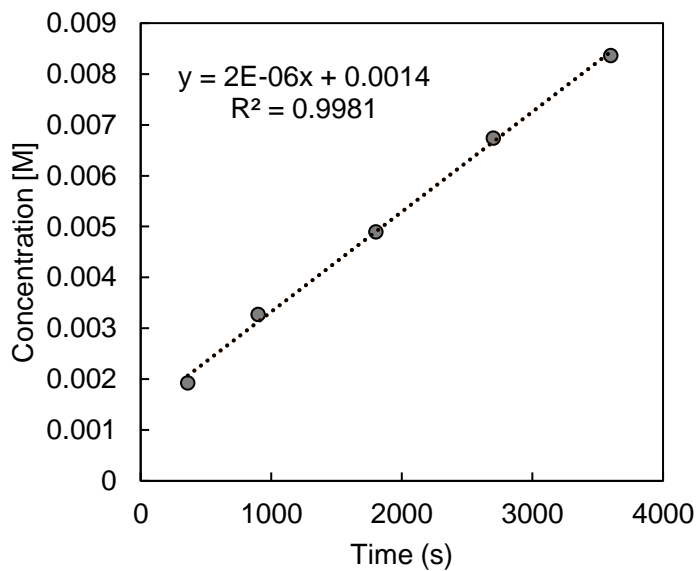

**Calculated rate = 2E-06 Ms<sup>-1</sup>**

**6.3 N-mesylation of pyridine using Phenyl(Mes)bromonium salt (0.05M, 1.0 equiv pyridine).**

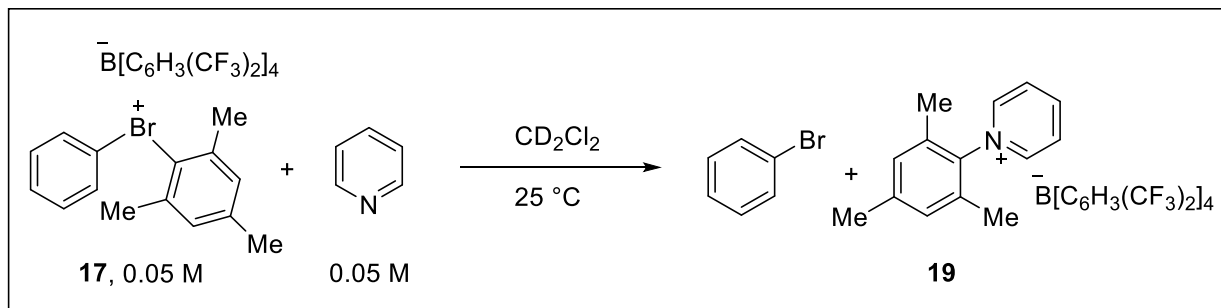

| Time (Hours) | % Yield Bromonium | % Yield product |
|--------------|-------------------|-----------------|
| 0.16667      | 98.44161          | 1.558389        |
| 0.41667      | 98.35399          | 1.646011        |
| 1.41667      | 98.01165          | 1.988351        |
| 2.41667      | 95.59585          | 4.404145        |
| 3.41667      | 95.01312          | 4.986877        |
| 4.66667      | 95.42289          | 4.577114        |
| 5.66667      | 94.29083          | 5.70917         |
| 6.66667      | 94.00903          | 5.990973        |
| 7.66667      | 92.18149          | 7.818513        |
| 8.66667      | 91.85307          | 8.146932        |
| 9.66667      | 91.45497          | 8.545035        |
| 10.6667      | 90.32124          | 9.678756        |
| 11.6667      | 89.67702          | 10.32298        |
| 12.6667      | 89.15361          | 10.84639        |
| 13.6667      | 89.01879          | 10.98121        |
| 14.6667      | 87.47176          | 12.52824        |
| 15.6667      | 86.90452          | 13.09548        |
| 19.6667      | 84.89445          | 15.10555        |
| 23.6667      | 82.11066          | 17.88934        |
| 27.6667      | 80.65114          | 19.34886        |
| 31.6667      | 77.98704          | 22.01296        |
| 35.6667      | 76.42328          | 23.57672        |
| 39.6667      | 74.31514          | 25.68486        |
| 43.6667      | 72.3564           | 27.6436         |
| 47.6667      | 70.67109          | 29.32891        |
| 51.6667      | 68.96262          | 31.03738        |
| 55.6667      | 66.69374          | 33.30626        |

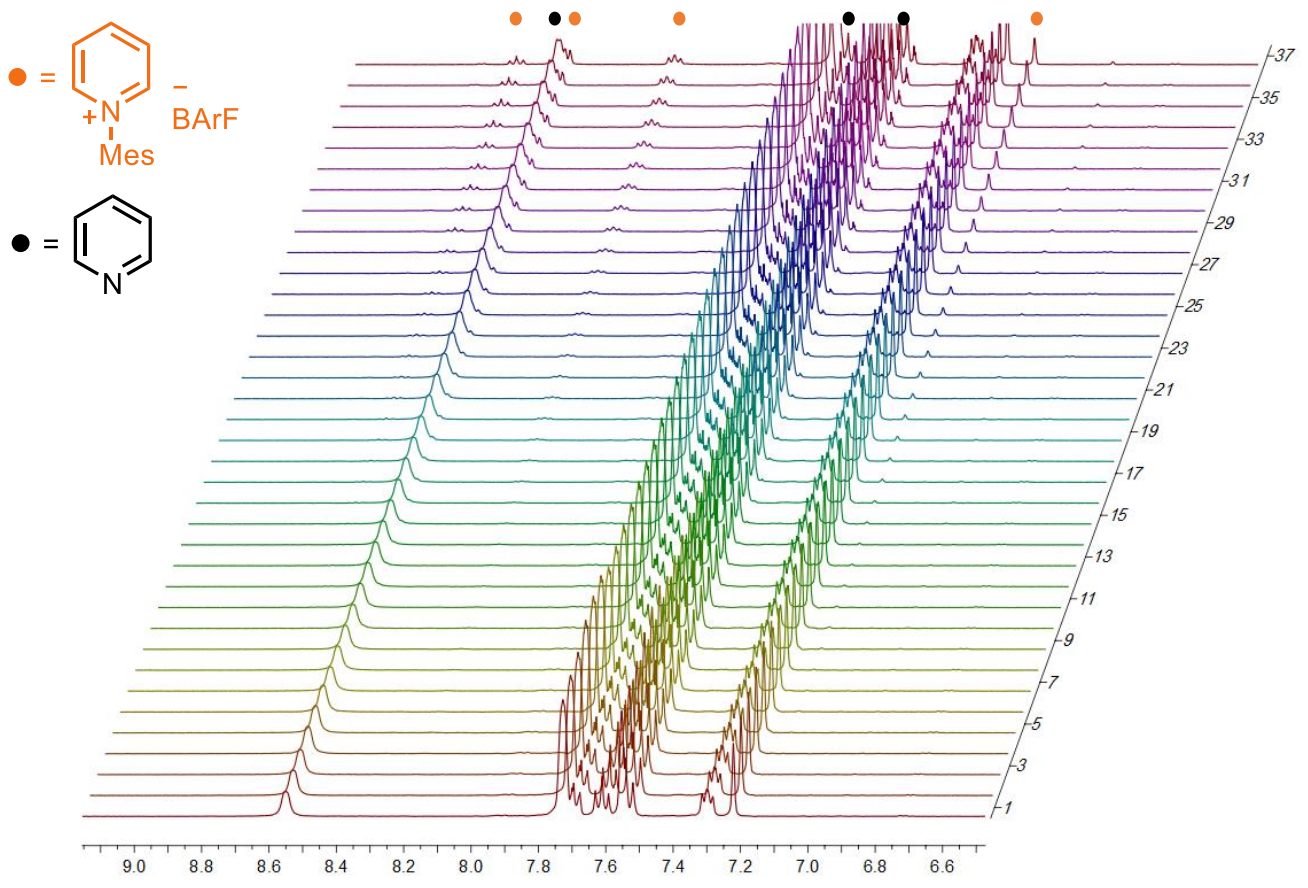

N-Mesylation of pyridine

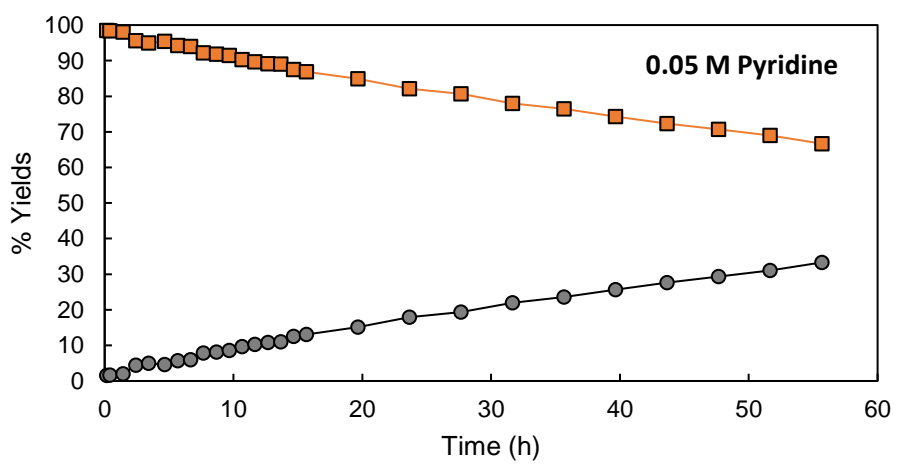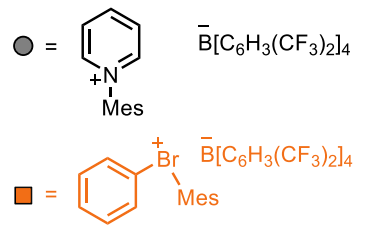

Initial rate of N-mesylation of pyridine using 0.05M (1.0 equiv) pyridine.

| Time (s) | Product concentration (M) |
|----------|---------------------------|
| 0        | 0                         |
| 3600     | 0.001088                  |
| 7200     | 0.001863                  |
| 10800    | 0.002326                  |
| 14400    | 0.002854                  |
| 18000    | 0.003413                  |
| 21600    | 0.003793                  |
| 25200    | 0.004108                  |
| 28800    | 0.004551                  |
| 32400    | 0.004832                  |

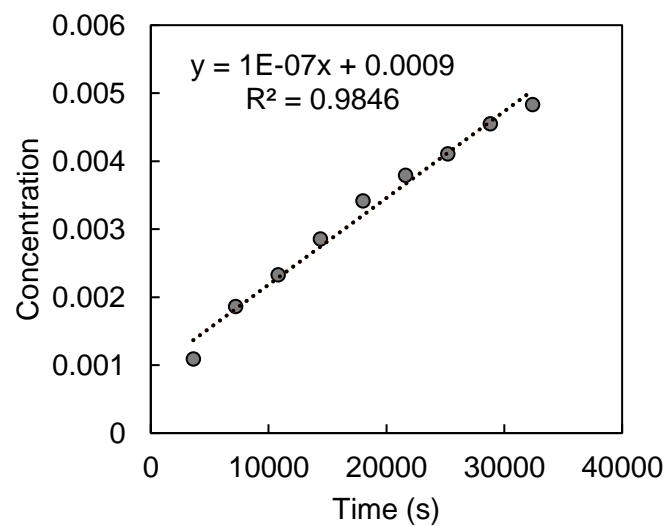

Calculated initial rate =  $1E-07 \text{ Ms}^{-1}$

**6.4 N-mesylation of pyridine using Phenyl(Mes)bromonium salt (0.05M, 1.0 equiv pyridine).**

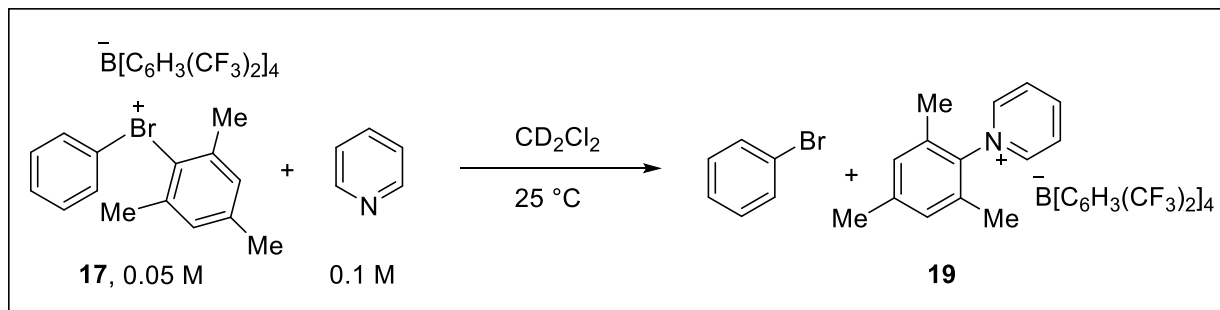

| Time (Hours) | % Yield Bromonium | % Yield product |
|--------------|-------------------|-----------------|
| 0.1          | 97.8882           | 2.1118          |
| 0.23333      | 97.6226           | 2.37738         |
| 0.73333      | 97.2311           | 2.76885         |
| 1.23333      | 96.0951           | 3.90492         |
| 1.73333      | 95.7339           | 4.26609         |
| 2.23333      | 94.7111           | 5.28893         |
| 2.73333      | 94.0951           | 5.90491         |
| 3.23333      | 93.3248           | 6.67516         |
| 3.73333      | 92.926            | 7.07404         |
| 4.23333      | 91.7281           | 8.27187         |
| 4.73333      | 91.5078           | 8.49225         |
| 5.23333      | 90.8046           | 9.1954          |
| 5.73333      | 89.4777           | 10.5223         |
| 6.23333      | 88.8178           | 11.1822         |
| 7.23333      | 87.8297           | 12.1703         |
| 8.23333      | 86.2212           | 13.7788         |
| 9.23333      | 85.0646           | 14.9354         |
| 10.2333      | 84.5118           | 15.4882         |
| 11.2333      | 82.6427           | 17.3573         |
| 12.2333      | 80.6207           | 19.3793         |
| 18.2333      | 72.1941           | 27.8059         |
| 30.2333      | 62.0061           | 37.9939         |
| 36.2333      | 56.2376           | 43.7624         |
| 42.2333      | 52.4105           | 47.5895         |

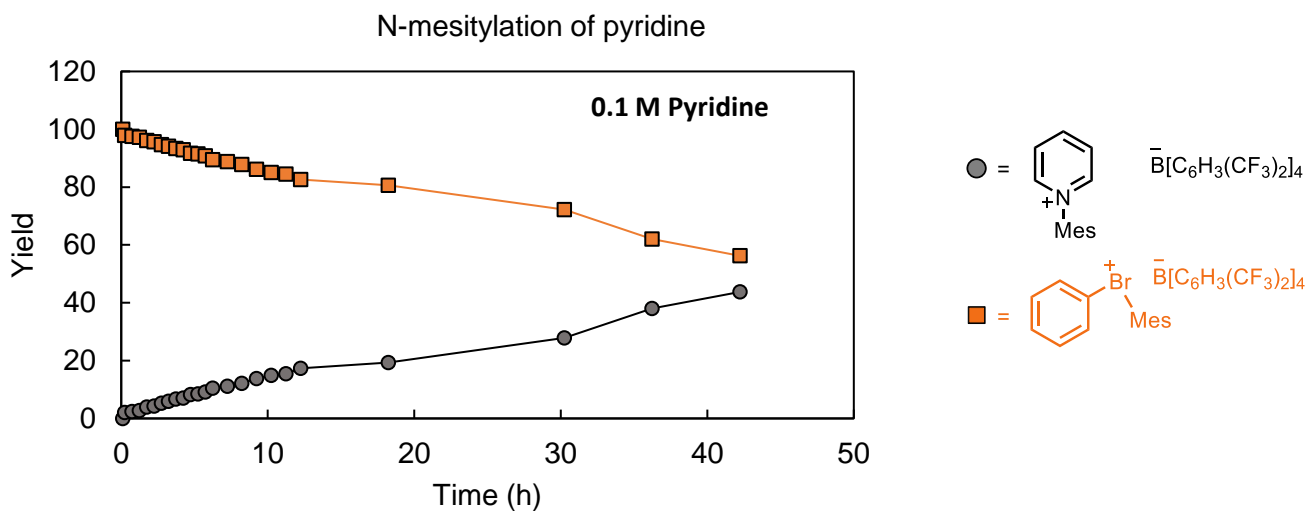

Initial rate of N-mesylation of pyridine using 0.1M (2.0 equiv) pyridine.

| Time (s) | Product concentration (M) |
|----------|---------------------------|
| 2640     | 0.00138                   |
| 4440     | 0.00195                   |
| 6240     | 0.00213                   |
| 8040     | 0.00264                   |
| 9840     | 0.00295                   |
| 11640    | 0.00334                   |
| 13440    | 0.00354                   |
| 15240    | 0.00414                   |
| 17040    | 0.00425                   |
| 18840    | 0.0046                    |

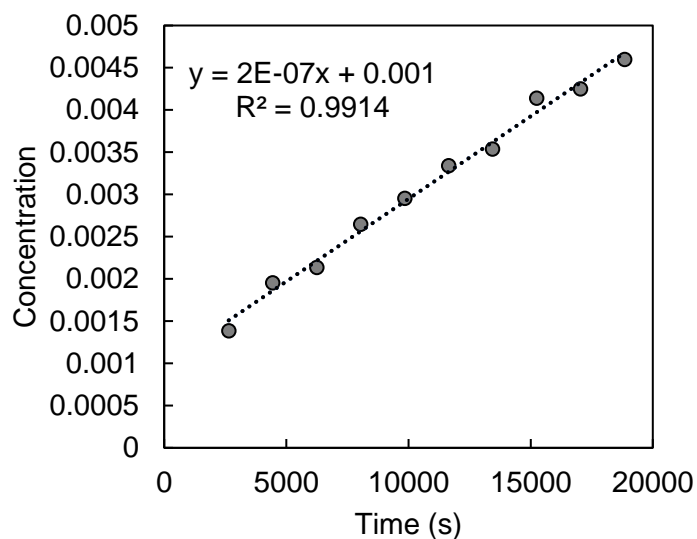

**Calculated rate = 2E-07 Ms<sup>-1</sup>**

7. Table S1: X-Ray and DFT bond angles (C-E-C) and % - orbital contributions for compounds 1-18, 20-22, and 26-28.

| Compound number | Compound structure<br>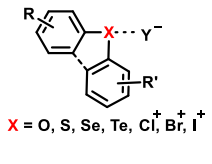<br>X = O, S, Se, Te, Cl <sup>+</sup> , Br <sup>+</sup> , I <sup>+</sup> | C-X-C bond angle (Degrees) (X-Ray) | C-X-C bond angle (Degrees) (DFT) | % p-contribution of X in C-X bond (DFT) | % s-contribution of X in C-X bond (DFT) | % p-contribution of X in C-X bond (DFT) | % s-contribution of X in C-X bond (DFT) |
|-----------------|---------------------------------------------------------------------------------------------------------------------------------------------------------------------------------|------------------------------------|----------------------------------|-----------------------------------------|-----------------------------------------|-----------------------------------------|-----------------------------------------|
| 1               |                                                                                                | 89.9<br>DN: 1108655                | 89.82000                         | 99.95                                   | 0.05                                    | 99.95                                   | 0.05                                    |
| 2               |                                                                                                | 92.73<br>DN: 1145289               | 91.74455                         | 87.33                                   | 12.67                                   | 94.52                                   | 5.48                                    |
| 3               |                                                                                                | 91.78<br>DN: 1145291               | 91.00486                         | 87.15                                   | 12.85                                   | 94.44                                   | 5.56                                    |
| 4               |                                                                                                | 93.23<br>DN: 1141628               | 90.52356                         | 87.21                                   | 12.79                                   | 94.36                                   | 5.64                                    |
| 5               |                                                                                               | 96.62<br>DN: 1532402               | 94.60386                         | 87.57                                   | 12.43                                   | 92.27                                   | 7.73                                    |
| 6               |                                                                                              | 93.85<br>DN: 1145282               | 95.85152                         | 88.04                                   | 11.96                                   | 91.45                                   | 8.55                                    |
| 7               |                                                                                              | 97.35<br>DN: 1532403               | 96.59151                         | 88.22                                   | 11.77                                   | 90.38                                   | 9.17                                    |
| 8               |                                                                                              | 96.98<br>DN: 1143645               | 94.39225                         | 85.26                                   | 14.74                                   | 92.55                                   | 7.45                                    |

|    |                                                                                     |                       |            |                              |                              |                             |                             |
|----|-------------------------------------------------------------------------------------|-----------------------|------------|------------------------------|------------------------------|-----------------------------|-----------------------------|
| 9  | 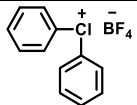    | 104.01<br>DN: 1895617 | 106.44193  | 80.93                        | 19.07                        | 80.98                       | 19.02                       |
| 10 |    | 96.07<br>DN: 1823314  | 97.75205   | 88.40                        | 11.60                        | 88.45                       | 11.55                       |
| 11 |    | 98.31<br>DN: 1823315  | 101.21058  | 85.17                        | 14.83                        | 85.17                       | 14.83                       |
| 12 |    | 100.81<br>DN: 1138454 | 101.21424  | 83.51                        | 14.49                        | 83.51                       | 14.49                       |
| 13 |    | 119.39<br>DN: 265008  | 122.16985  | 67.40                        | 32.60                        | 67.40                       | 32.60                       |
| 14 |    | 122.30<br>DN: 265022  | 121.96691  | 67.42                        | 32.58                        | 67.42                       | 32.58                       |
| 15 |    | 118.27<br>DN: 253210  | 121.19232  | 67.78                        | 32.22                        | 67.78                       | 32.22                       |
| 16 |    | 102.26<br>DN: 2124114 | 96.73807*  | 90.71 (I-C <sub>Mes</sub> )* | 9.29 (I-C <sub>Mes</sub> )*  | 88.12 (I-C <sub>Ph</sub> )* | 11.88 (I-C <sub>Ph</sub> )* |
| 17 |   | 104.64<br>DN: 2124113 | 102.56169* | 86.27 (I-C <sub>Mes</sub> )* | 13.73 (I-C <sub>Mes</sub> )* | 86.13 (I-C <sub>Ph</sub> )* | 13.87 (I-C <sub>Ph</sub> )* |
| 18 |  | 107.80<br>DN: 2124112 | 107.13449* | 80.35 (I-C <sub>Mes</sub> )* | 19.65 (I-C <sub>Mes</sub> )* | 81.77 (I-C <sub>Ph</sub> )* | 18.23 (I-C <sub>Ph</sub> )* |
| 20 |  | 81.93<br>DN: 2063903  | 80.68385   | 14.17(I-C <sub>1</sub> )     | 85.83 (I-C <sub>1</sub> )    | 5.99 (I-C <sub>2</sub> )    | 94.01(I-C <sub>2</sub> )    |



|    |                                                                                   |                      |           |                            |                            |                            |                            |
|----|-----------------------------------------------------------------------------------|----------------------|-----------|----------------------------|----------------------------|----------------------------|----------------------------|
| 21 | 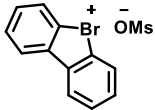  | 87.22<br>DN: 2063898 | 85.75388  | 15.22(I-C <sub>1</sub> )   | 84.78(I-C <sub>1</sub> )   | 9.14 (I-C <sub>2</sub> )   | 90.86 (I-C <sub>2</sub> )  |
| 22 |  | N/A                  | 90.51275  | 18.65(I-C <sub>1</sub> )   | 81.35(I-C <sub>1</sub> )   | 14.30 (I-C <sub>2</sub> )  | 85.61 (I-C <sub>2</sub> )  |
| 26 |  | 81.80<br>DN: 1811376 | 81.24465* | 12.01 (I-C <sub>1</sub> )* | 87.99 (I-C <sub>1</sub> )* | 7.63 (I-C <sub>2</sub> )*  | 92.37 (I-C <sub>2</sub> )* |
| 27 |  | N/A                  | 86.6105*  | 17.08 (I-C <sub>1</sub> )* | 82.92 (I-C <sub>1</sub> )* | 11.47 (I-C <sub>2</sub> )* | 88.53 (I-C <sub>2</sub> )* |
| 28 |  | N/A                  | 91.32296* | 18.53 (I-C <sub>1</sub> )* | 81.47 (I-C <sub>1</sub> )* | 16.55 (I-C <sub>2</sub> )* | 83.45 (I-C <sub>2</sub> )* |

\* = The calculations were performed on the corresponding BF<sub>4</sub> salts instead of the BArF salts

**8. Table S2: Hirshfeld charges on central atom (E) for compounds 1-18, 20-22, and 26-28.**

| Compound | Structure                                                                           | C-E-C bond angle | Hirshfeld charge on E |
|----------|-------------------------------------------------------------------------------------|------------------|-----------------------|
| 1        | 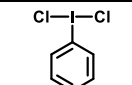   | 89.82000         | 0.4974800000          |
| 2        |    | 91.74455         | 0.3756621745          |
| 3        |    | 91.00486         | 0.3652003306          |
| 4        |    | 90.52356         | 0.3566397344          |
| 5        |    | 94.60386         | 0.4405189406          |
| 6        |    | 95.85152         | 0.4808483276          |
| 7        |    | 96.59151         | 0.4758232784          |
| 8        |   | 94.39225         | 0.3229563526          |
| 9        |  | 106.44193        | 0.3315129849          |
| 10       |  | 97.75205         | 0.0836005590          |
| 11       |  | 101.21058        | 0.0418995320          |
| 12       |  | 101.21424        | 0.06384               |
| 13       |  | 122.16985        | -0.09781              |
| 14       |  | 121.96691        | -0.1029               |
| 15       |  | 121.19232        | -0.115248562          |
| 16       |  | 96.73807         | 0.5860000000          |

|    |                                                                                     |           |              |
|----|-------------------------------------------------------------------------------------|-----------|--------------|
| 17 | 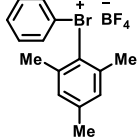   | 102.56169 | 0.4880000000 |
| 18 |    | 107.13449 | 0.3590000000 |
| 20 |    | 80.68385  | 0.44302904   |
| 21 |    | 85.75388  | 0.39456207   |
| 22 |    | 90.51275  | 0.34228056   |
| 26 |    | 81.24465  | 0.49914309   |
| 27 |   | 86.6105   | 0.44408804   |
| 28 |  | 91.32296  | 0.3773985    |

9. Figure S2: Correlation of Hirshfeld charges on central atom (E) and DFT bond angles (C-E-C)

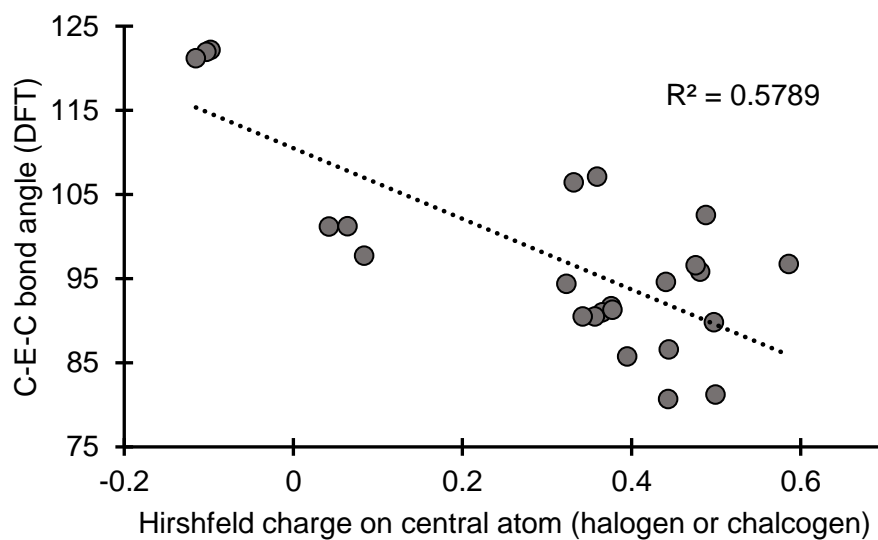



## 10. NMR spectra

$^1\text{H}$  NMR (400 MHz,  $\text{CD}_3\text{CN}$ ): Compound Mes- $\text{N}_2$  BARF (S2)

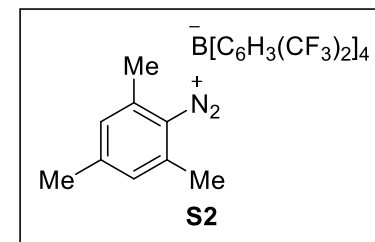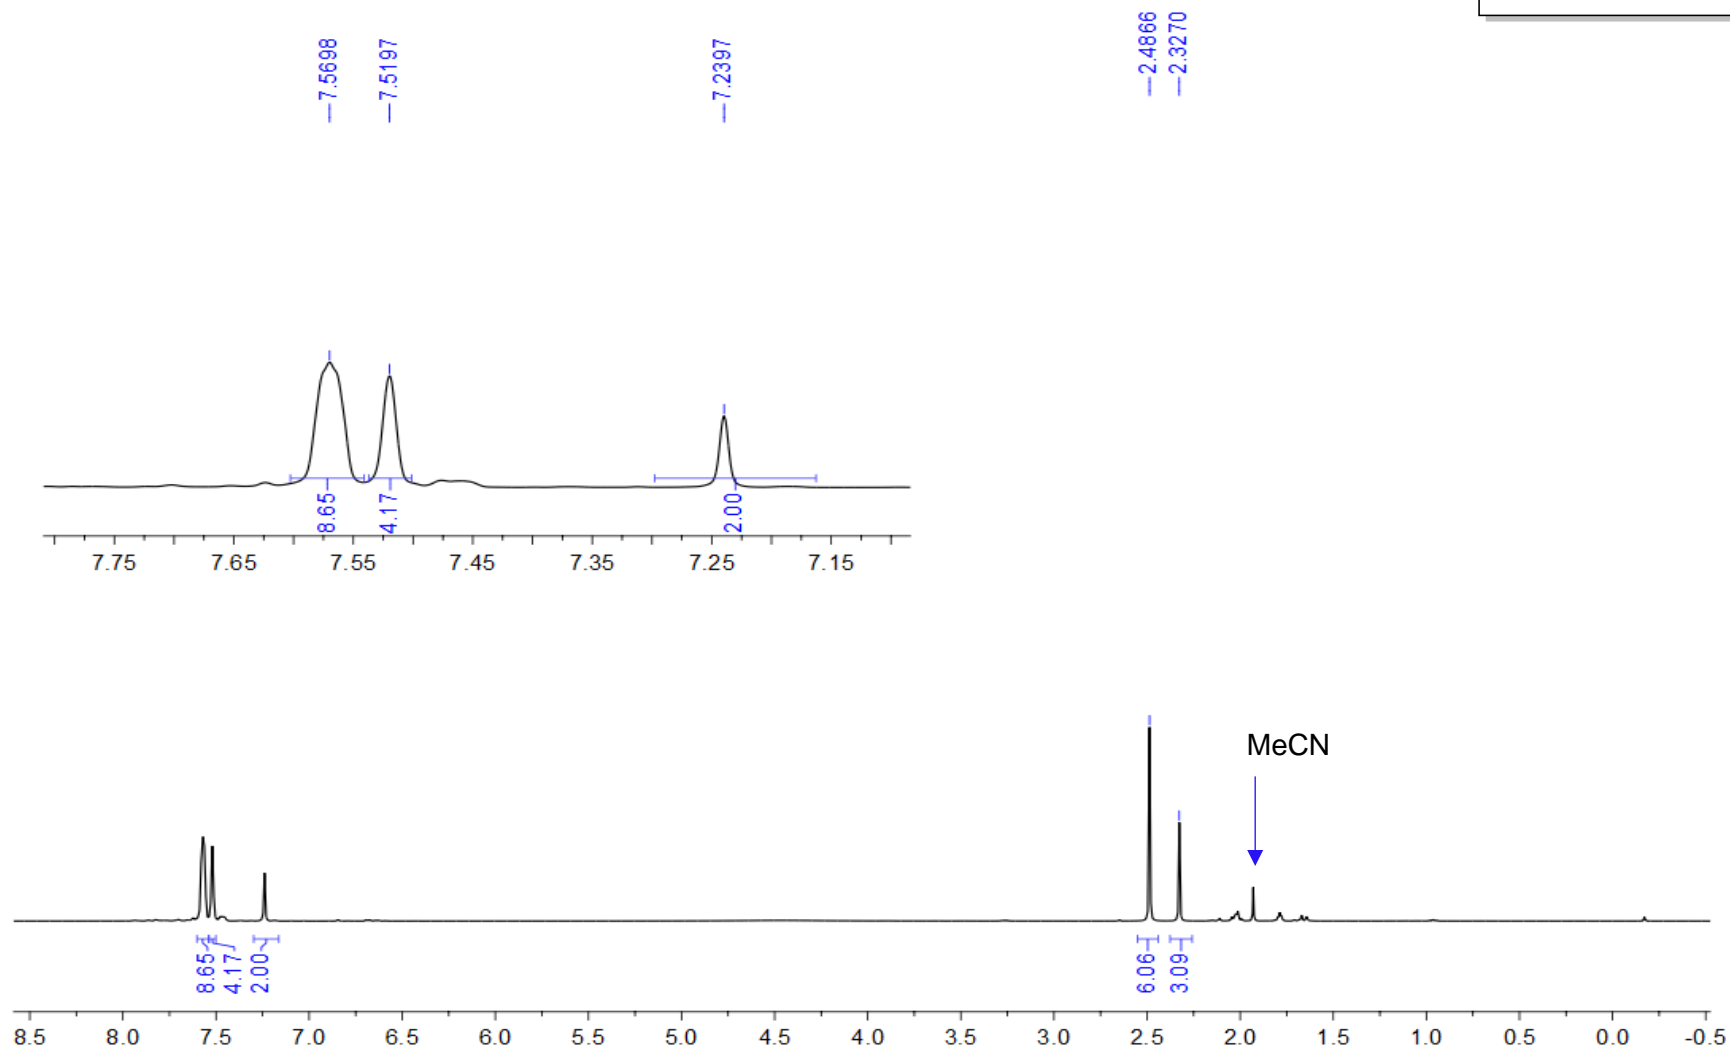

$^{13}\text{C}\{^1\text{H}\}$  NMR (101 MHz,  $\text{CD}_3\text{CN}$ ): Compound **Mes-N<sub>2</sub> BArF (S2)**

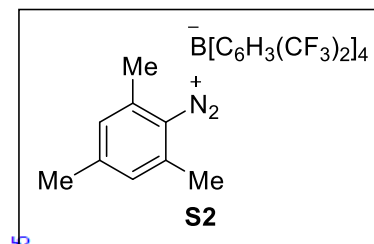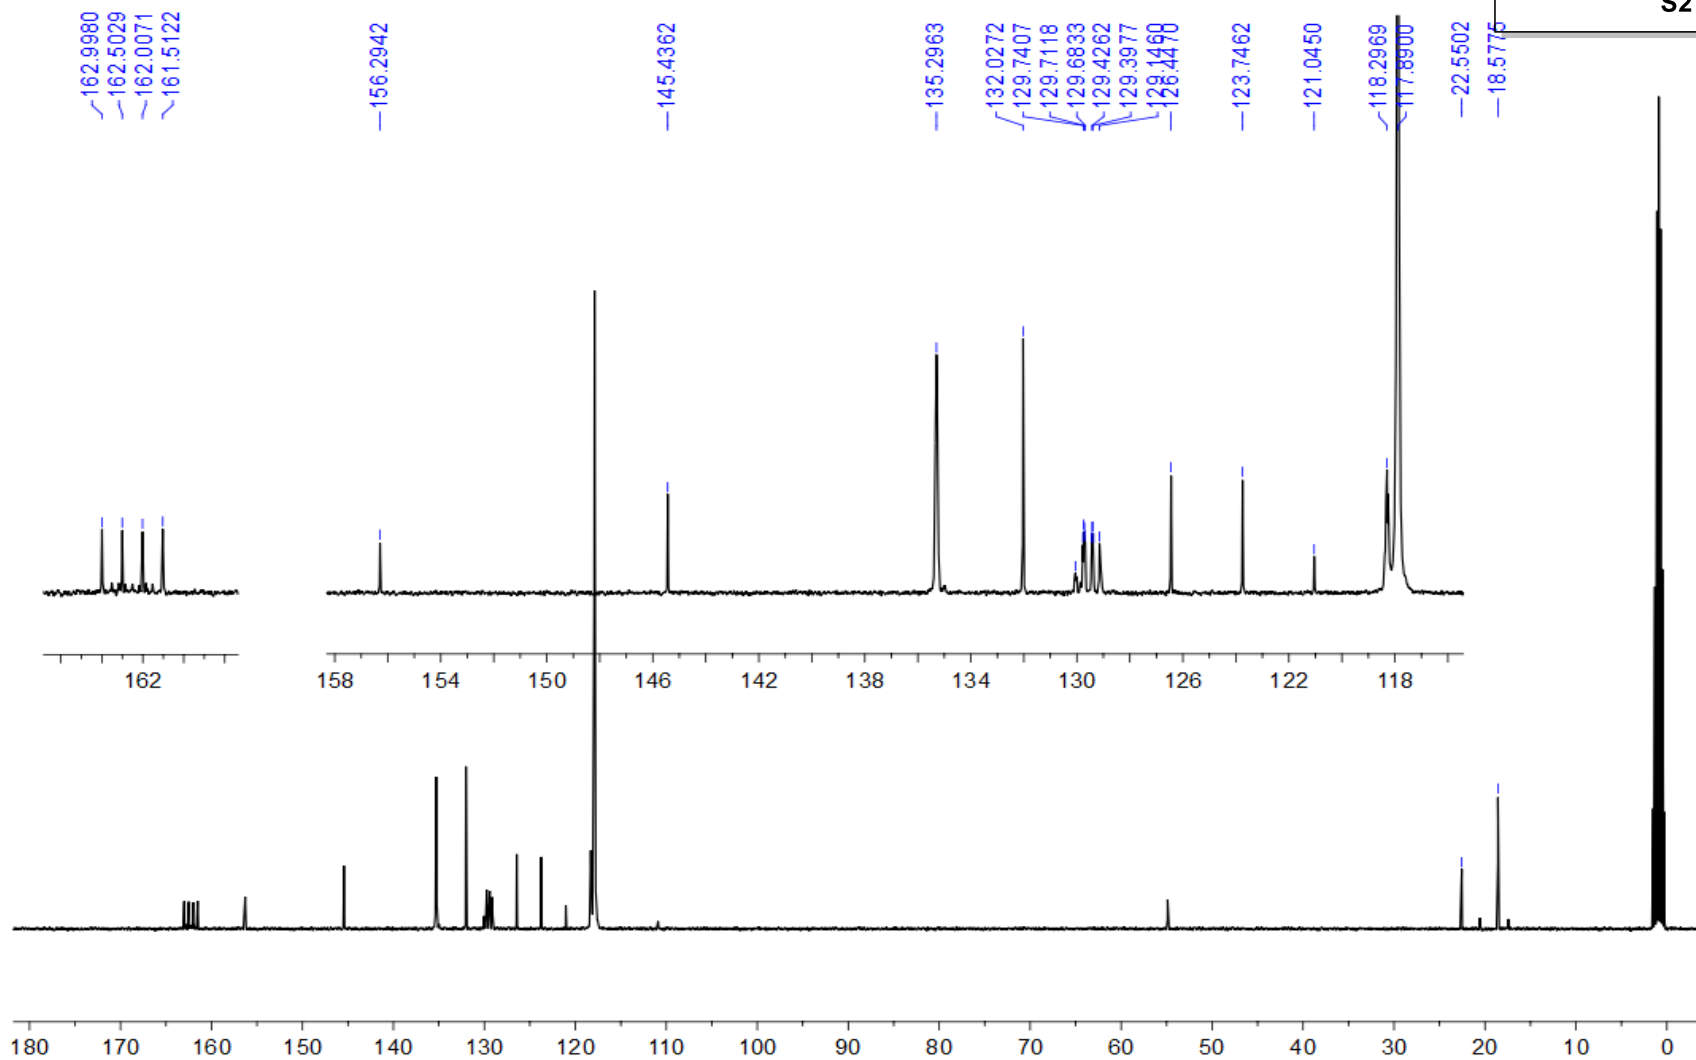

$^{19}\text{F}\{^1\text{H}\}$  NMR (376 MHz,  $\text{CD}_3\text{CN}$ ): Compound **Mes-N<sub>2</sub> BArF (S2)**

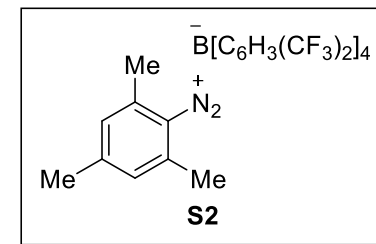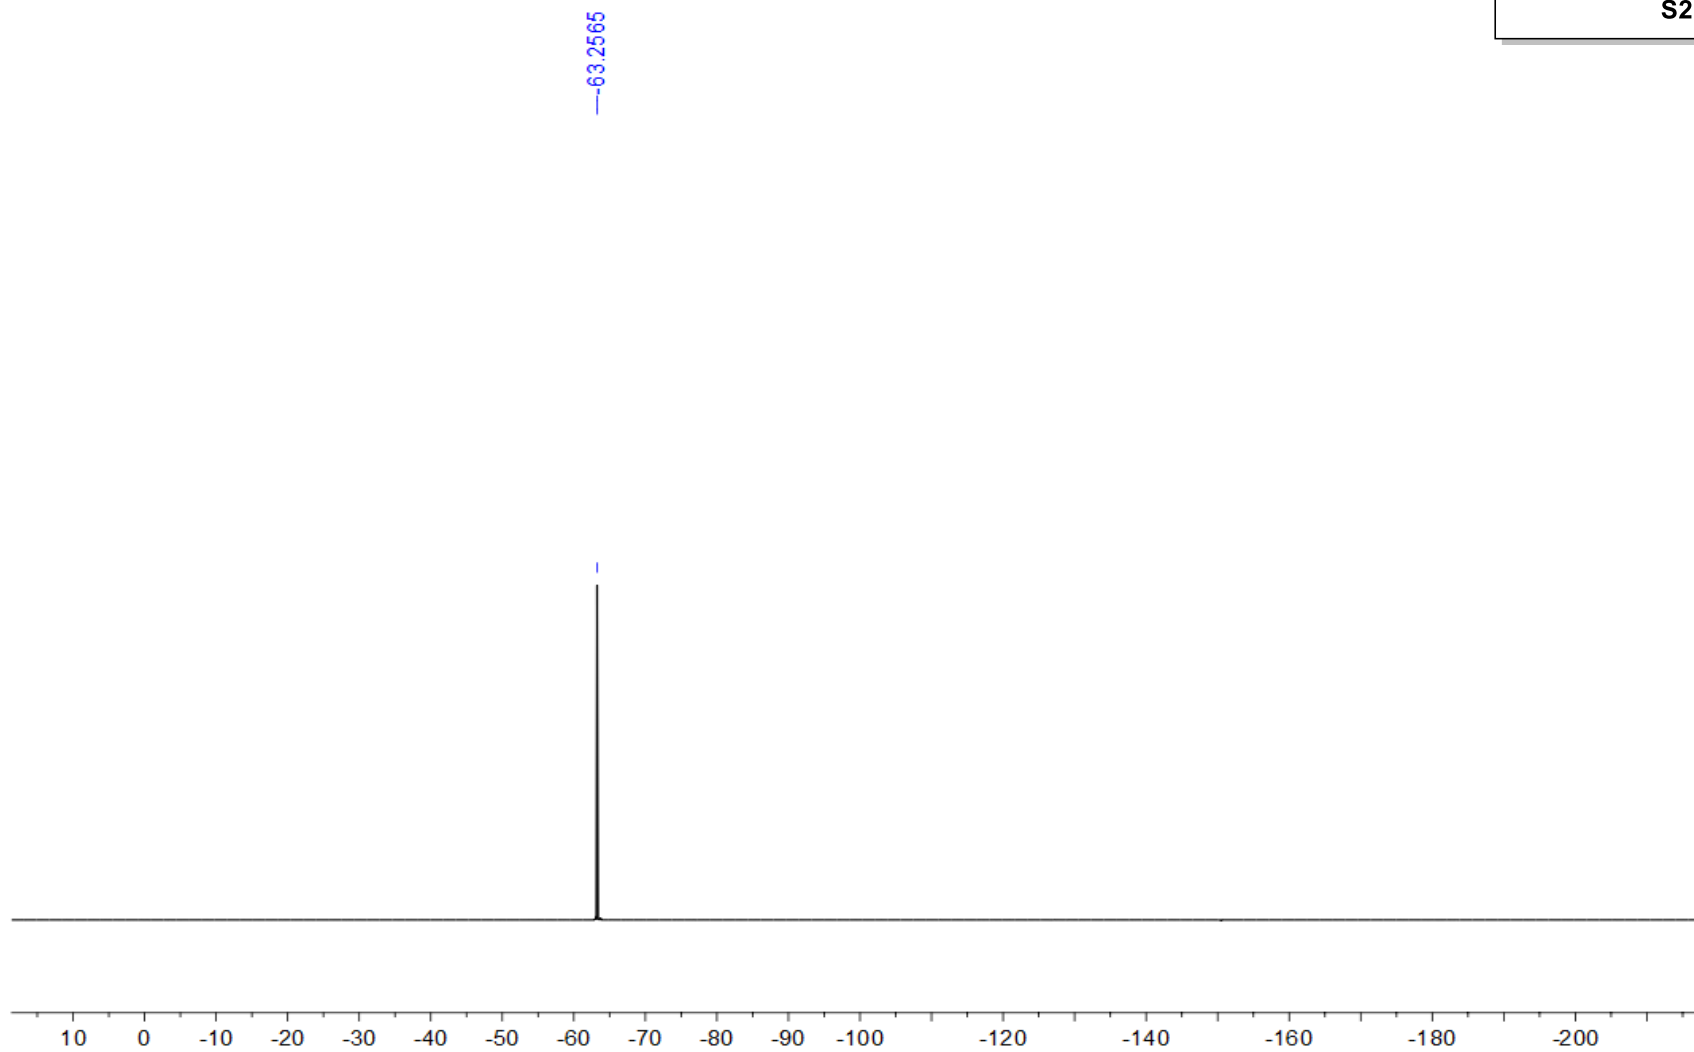

$^1\text{H}$  NMR (400 MHz,  $\text{DMSO-}d_6$ ): Compound **S6**

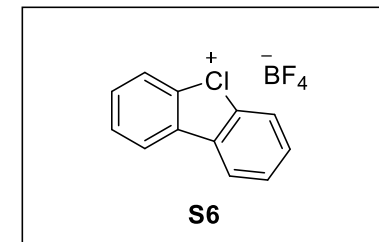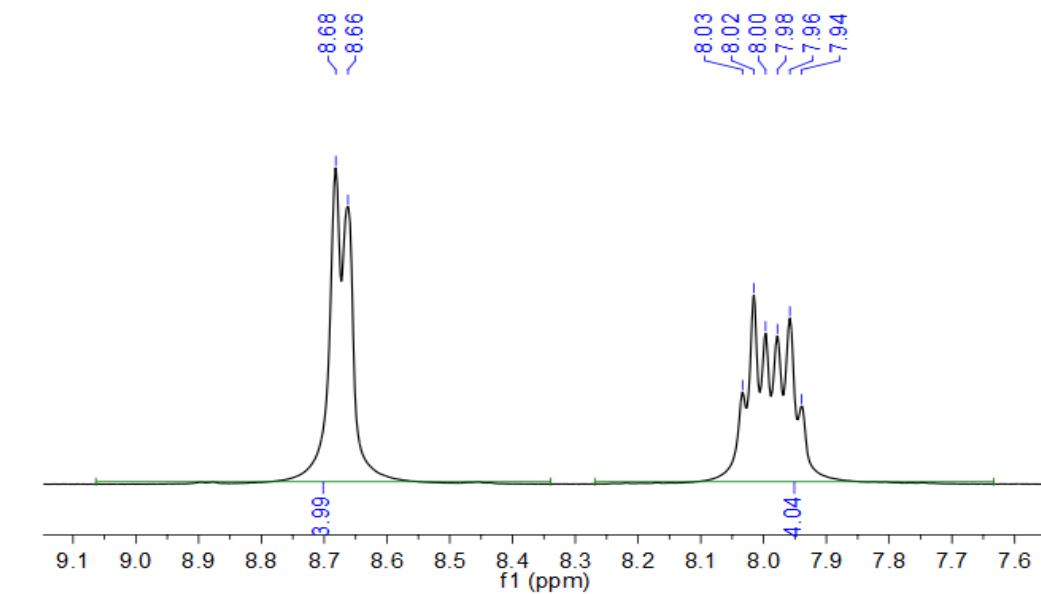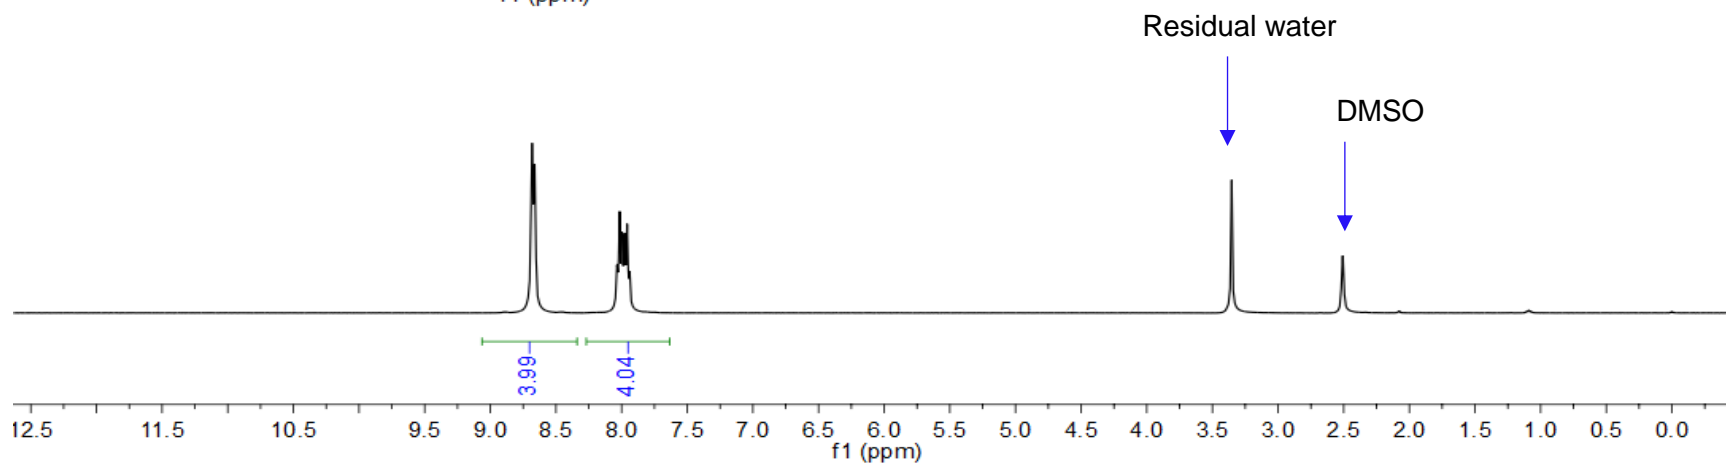



$^{13}\text{C}\{^1\text{H}\}$  NMR (101 MHz, DMSO- $d_6$ ): Compound **S6**

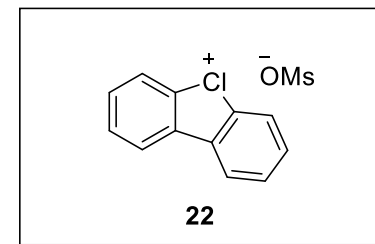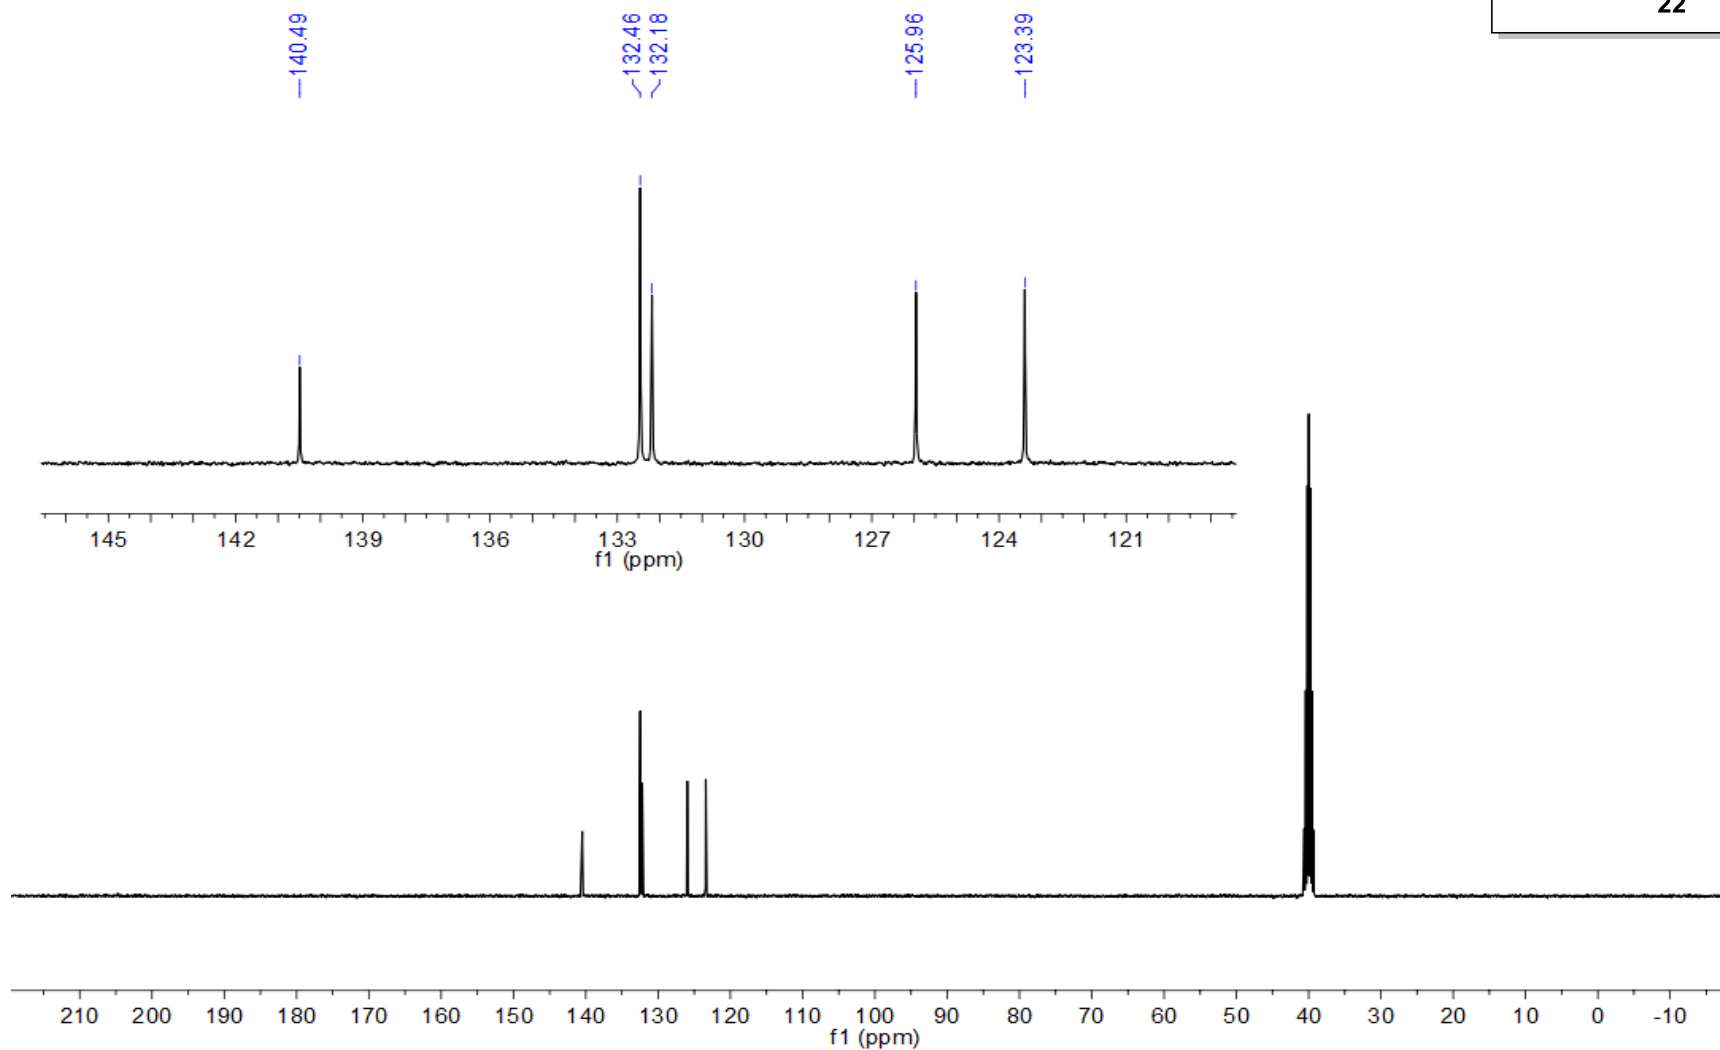

$^{19}\text{F}\{^1\text{H}\}$  NMR (376 MHz, DMSO- $d_6$ ): Compound **S6**

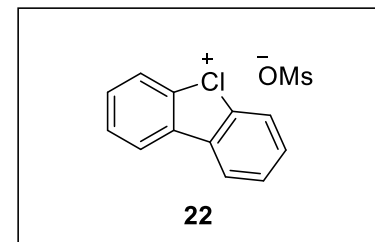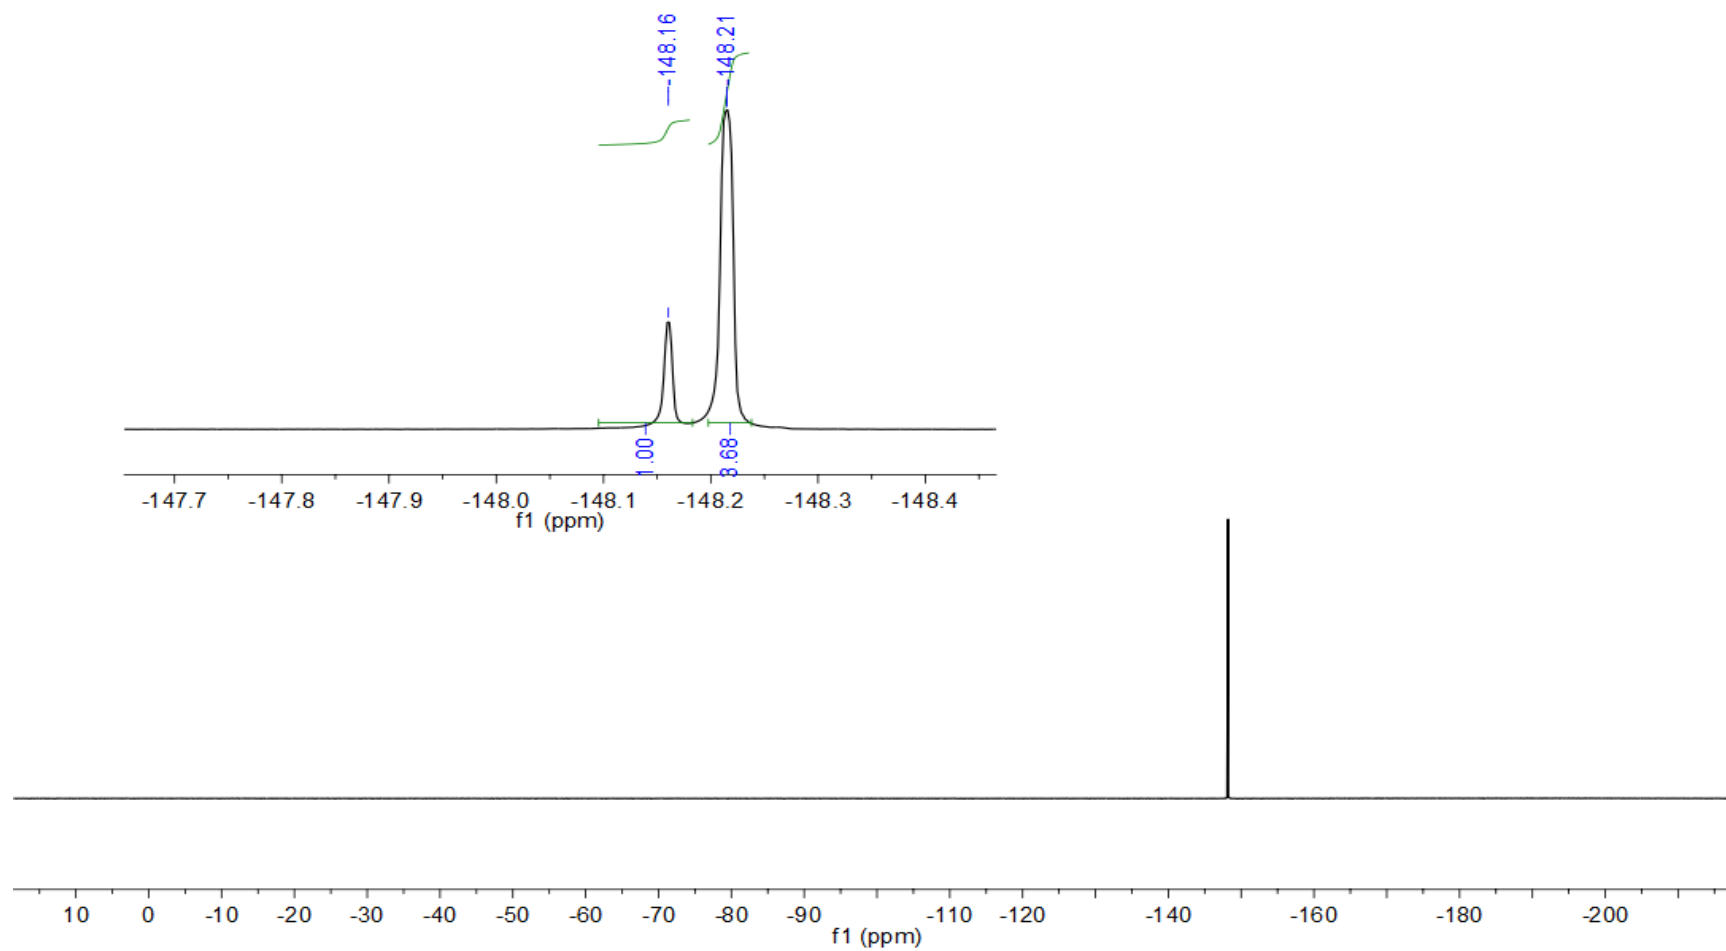

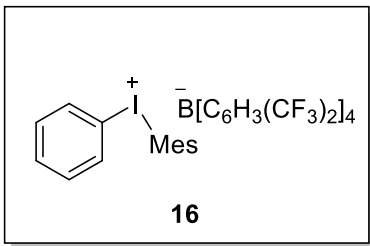

<sup>1</sup>H NMR (400 MHz, CD<sub>3</sub>CN): Compound **16**

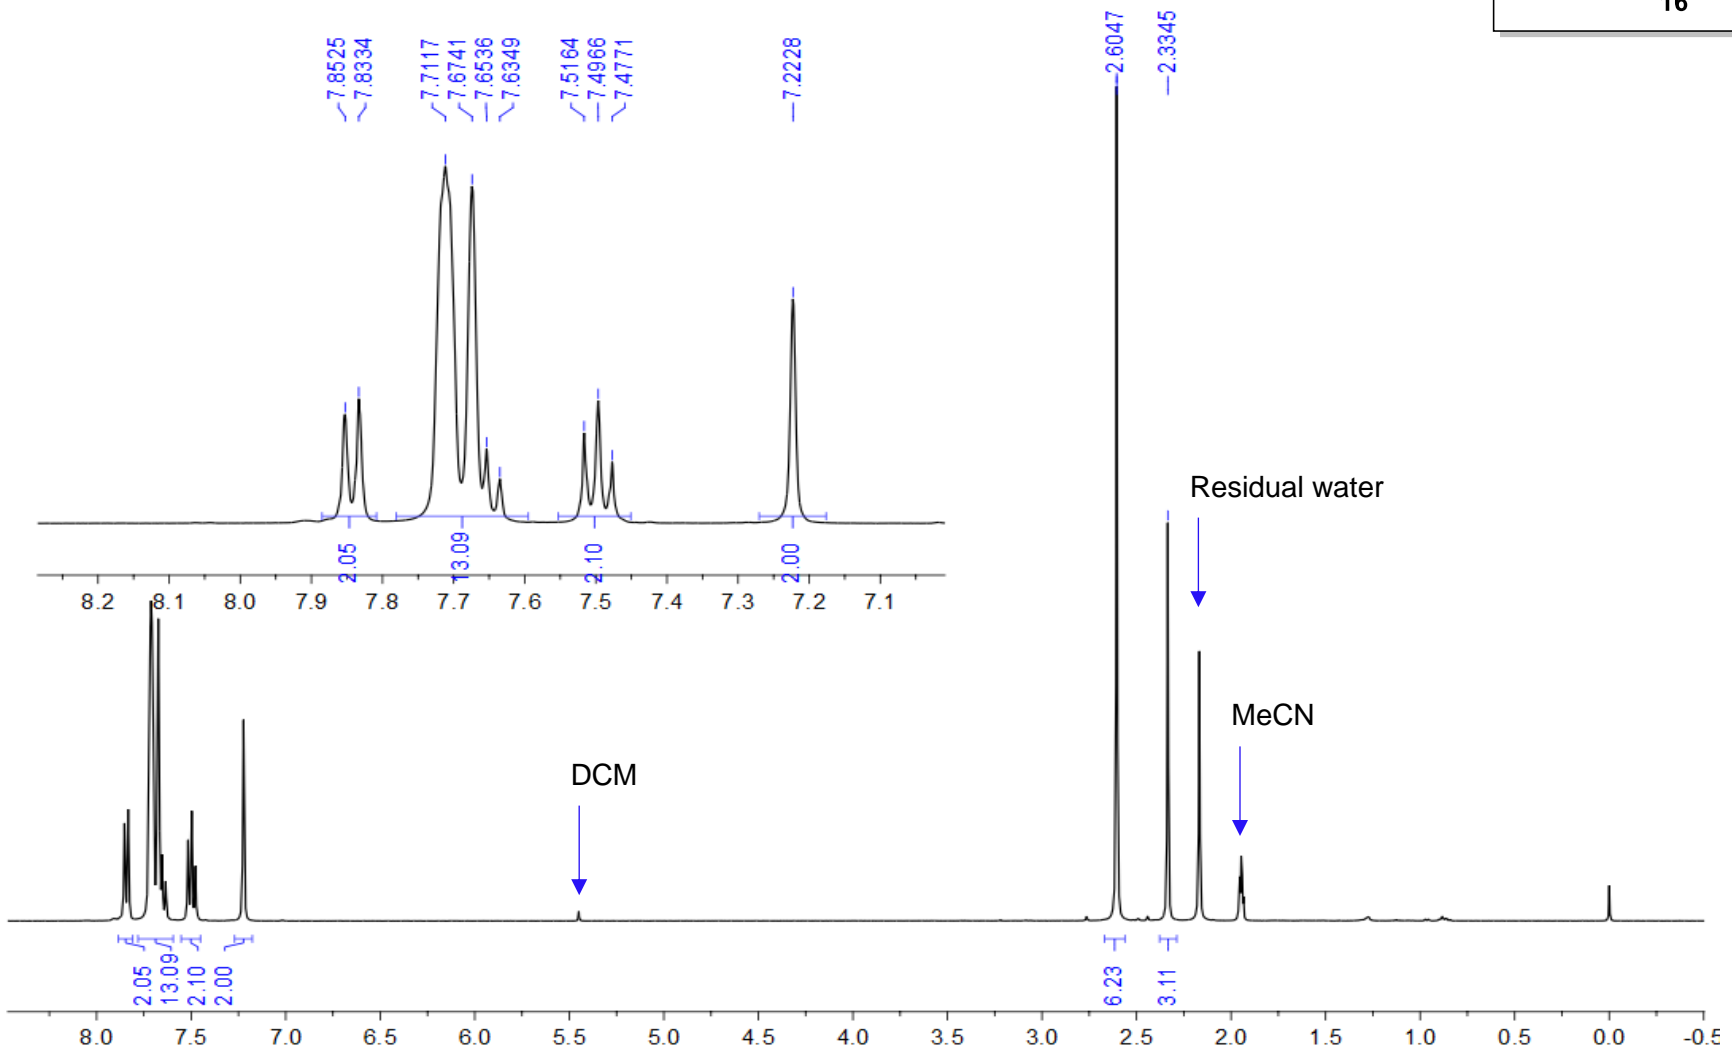

$^{13}\text{C}\{^1\text{H}\}$  NMR (101 MHz,  $\text{CD}_3\text{CN}$ ): Compound **16**

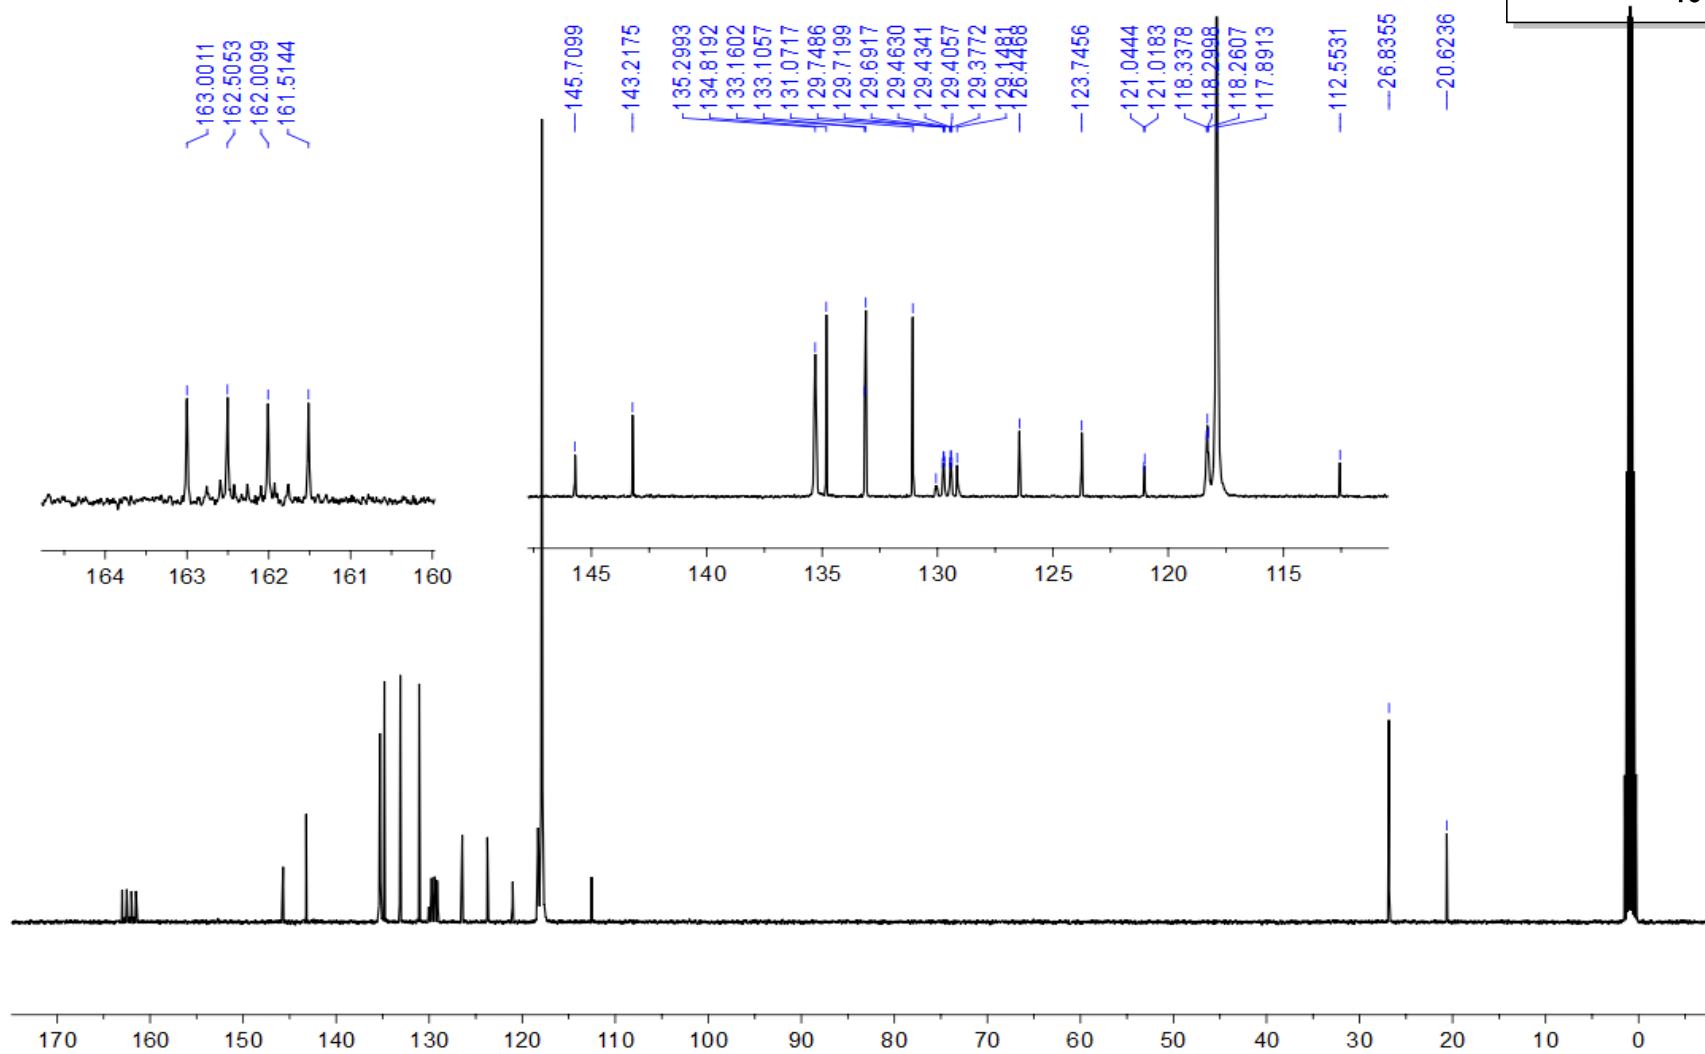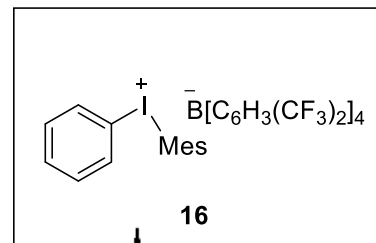

$^{19}\text{F}\{^1\text{H}\}$  NMR (376 MHz,  $\text{CD}_3\text{CN}$ ): Compound **16**

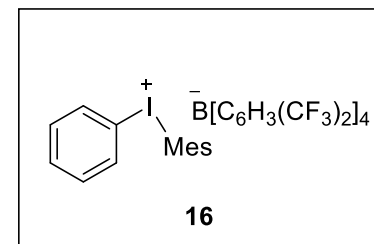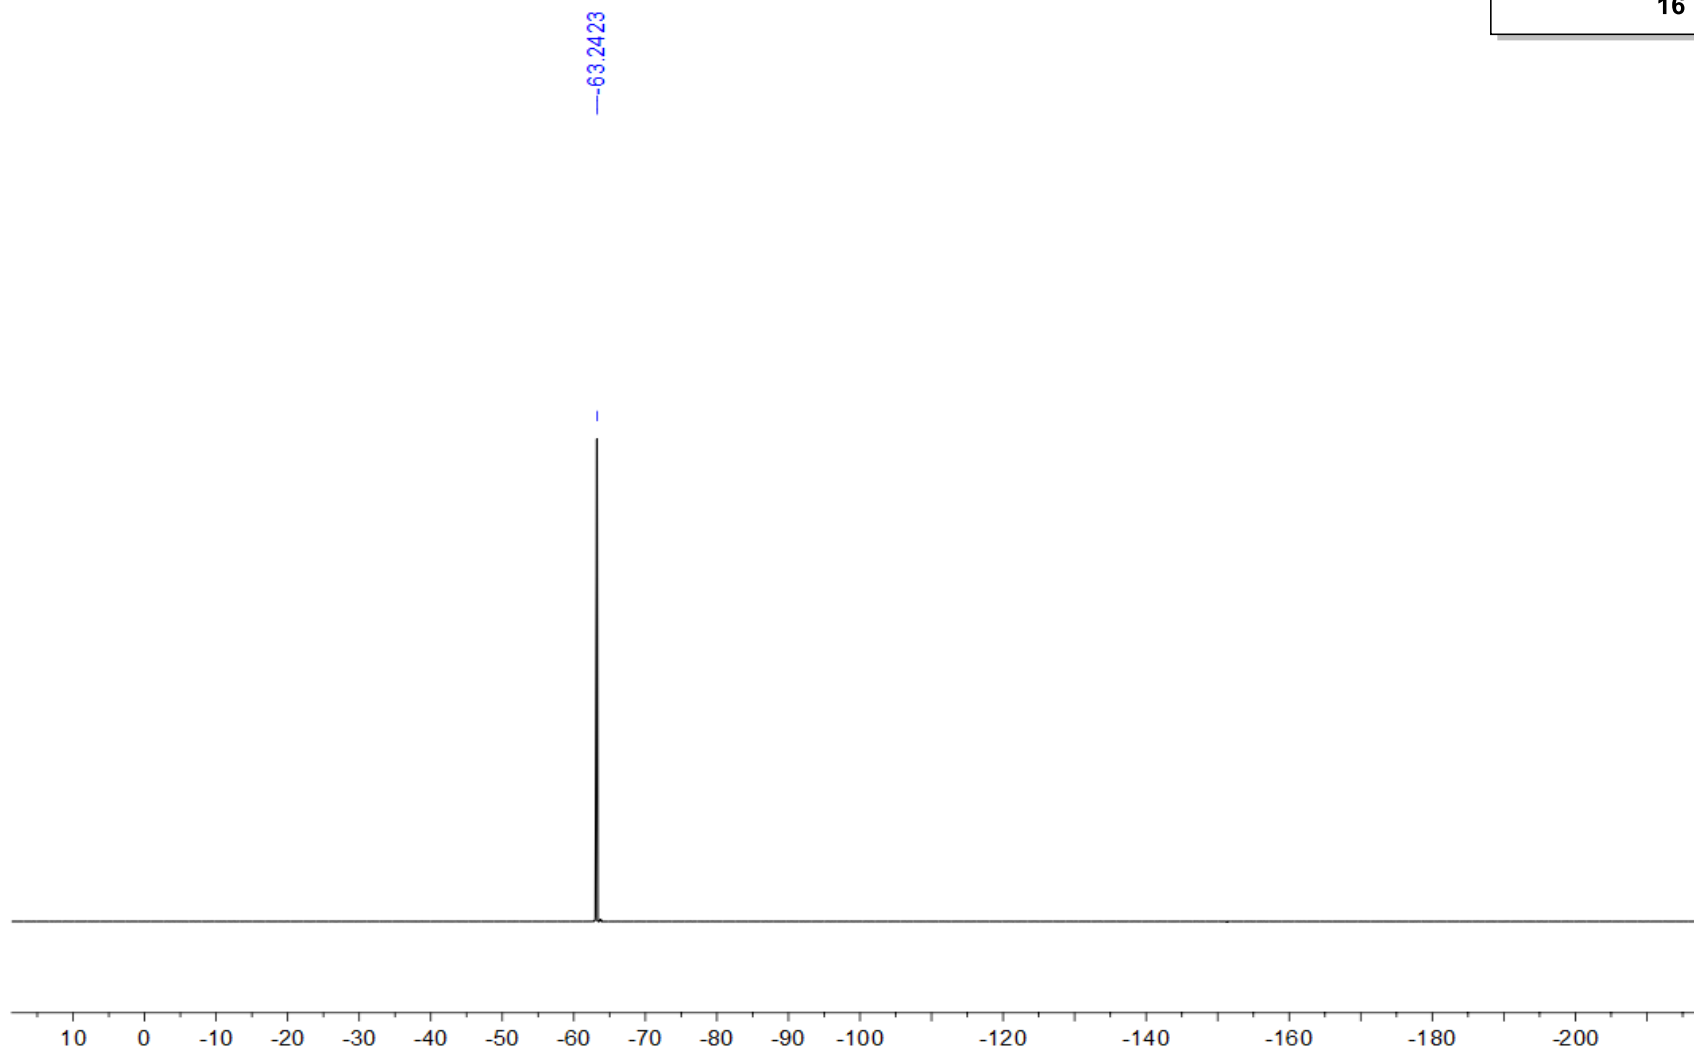

<sup>1</sup>H NMR (400 MHz, CD<sub>3</sub>CN): Compound 17

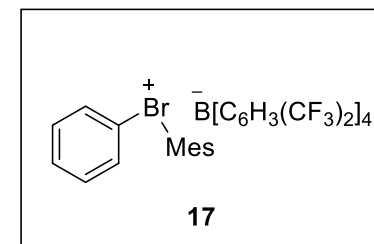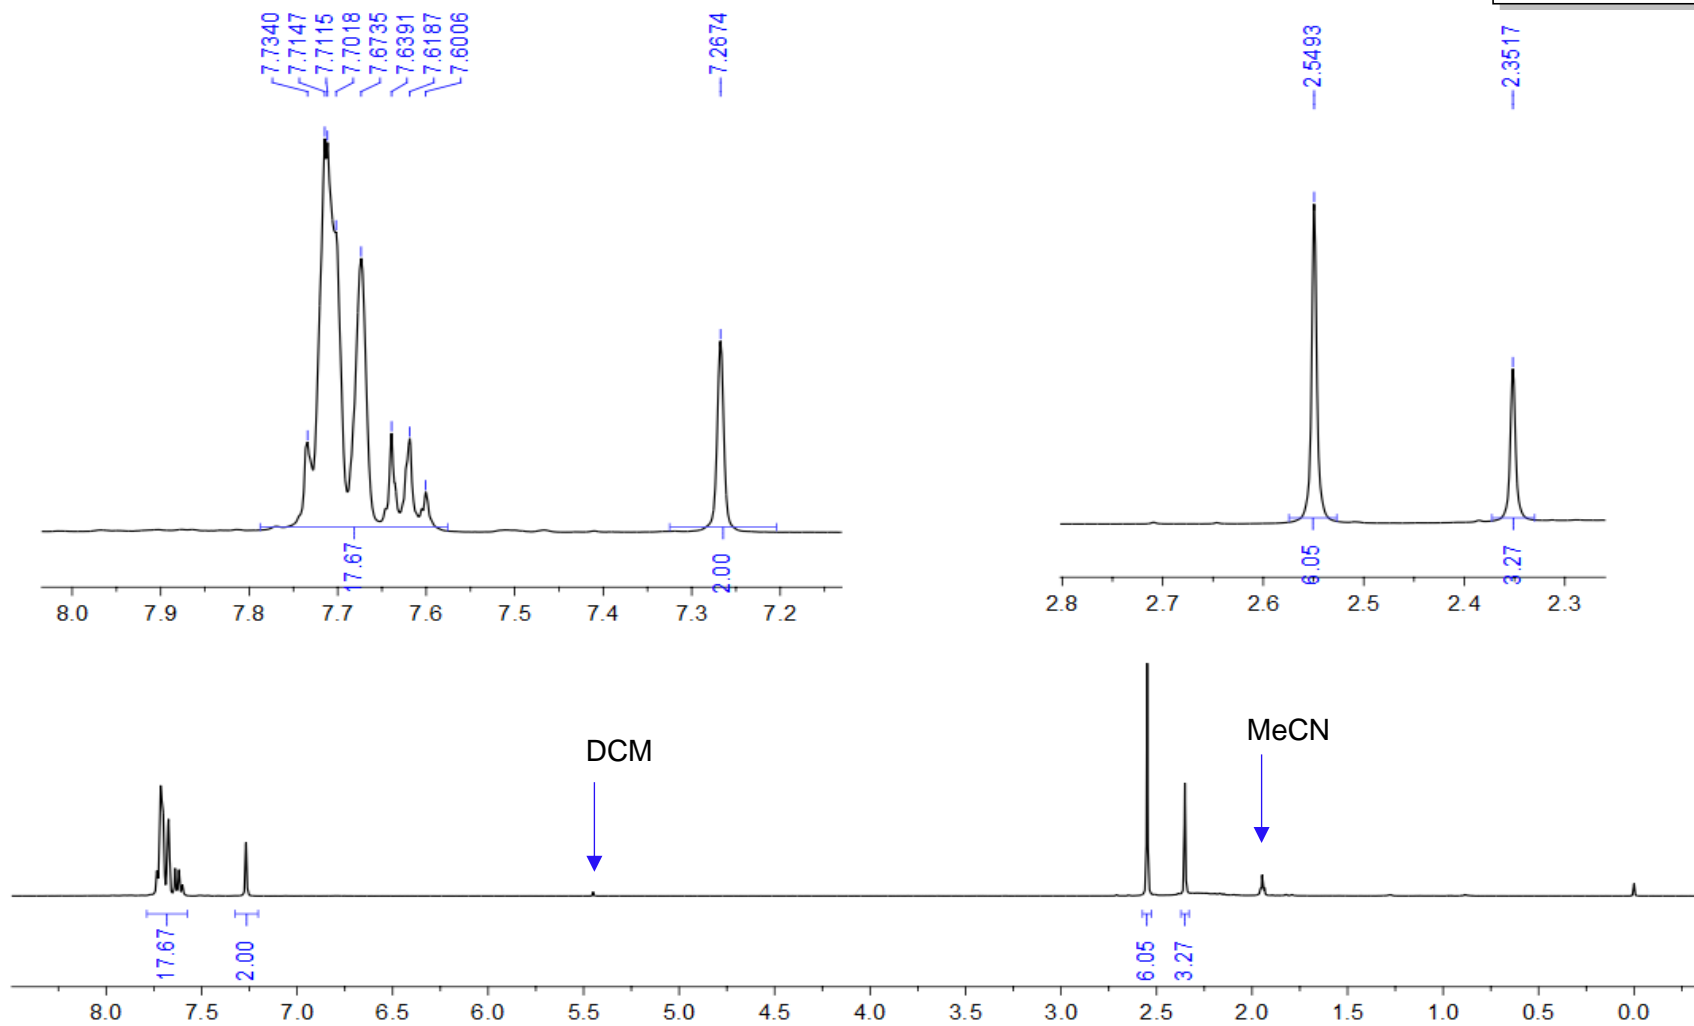

$^{13}\text{C}\{^1\text{H}\}$  NMR (101 MHz,  $\text{CD}_3\text{CN}$ ): Compound **17**

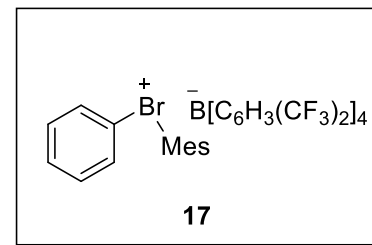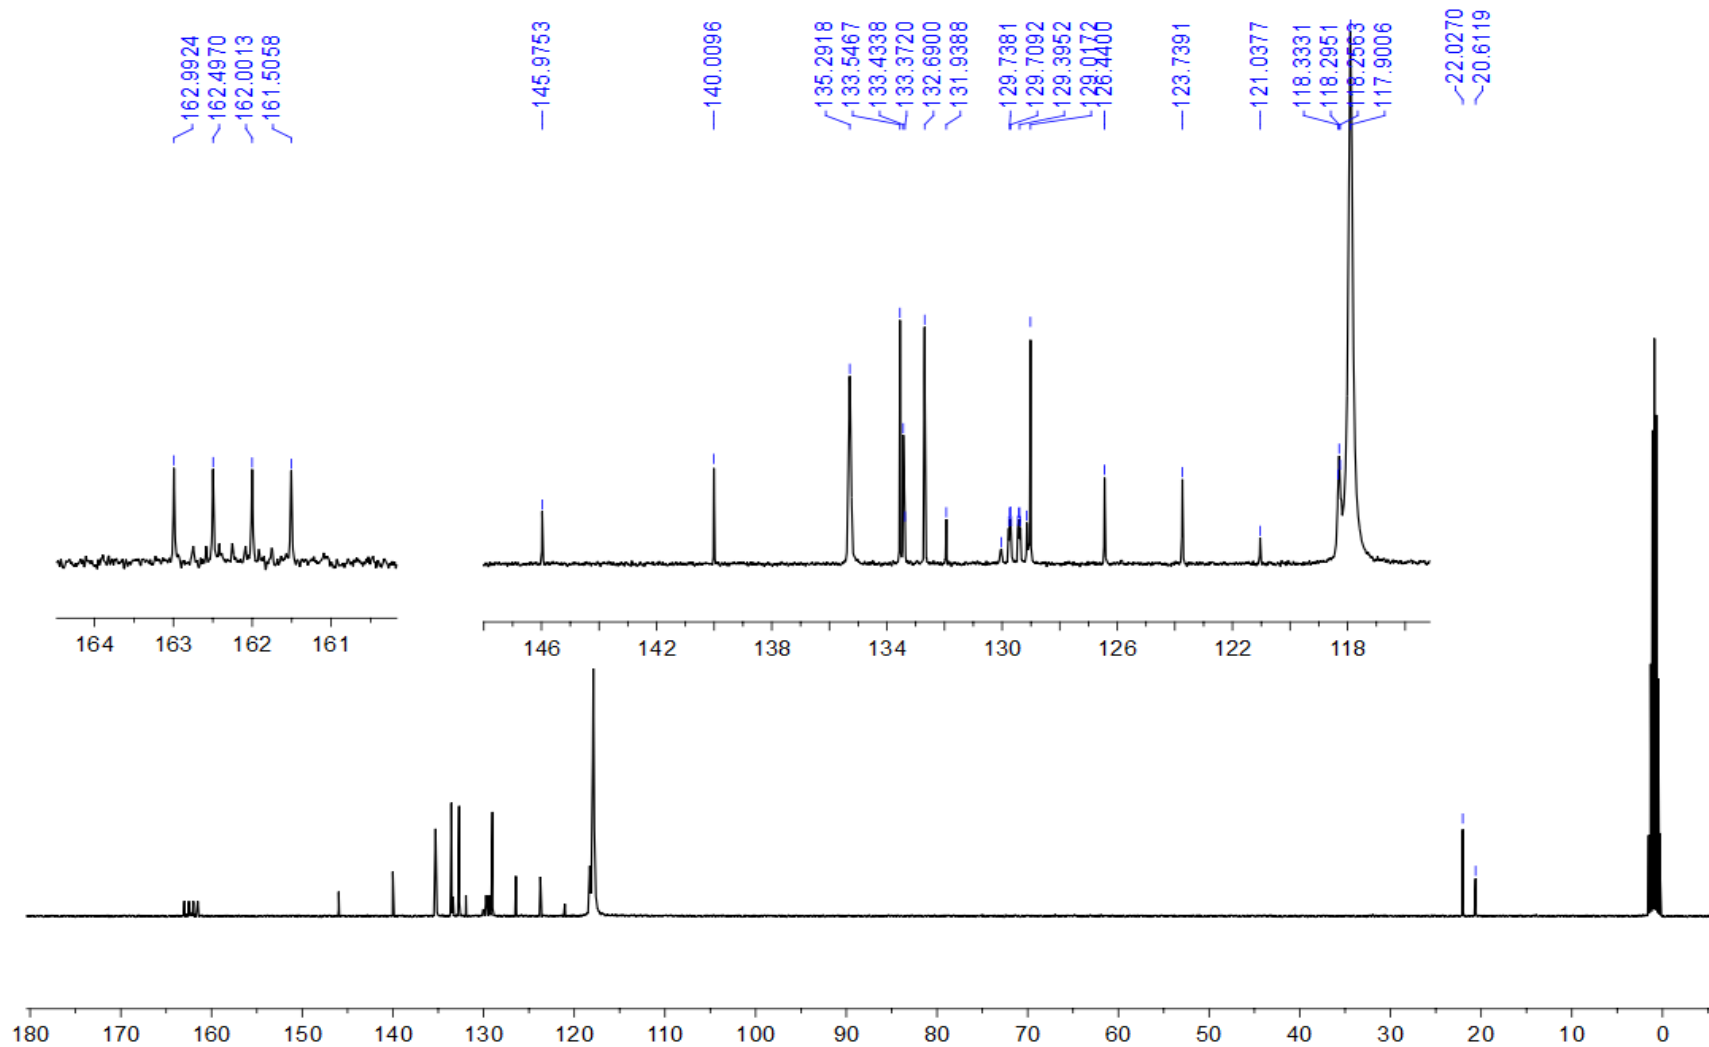

$^{19}\text{F}\{^1\text{H}\}$  NMR (376 MHz,  $\text{CD}_3\text{CN}$ ): Compound **17**

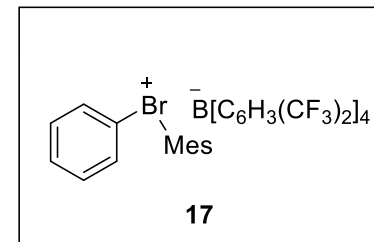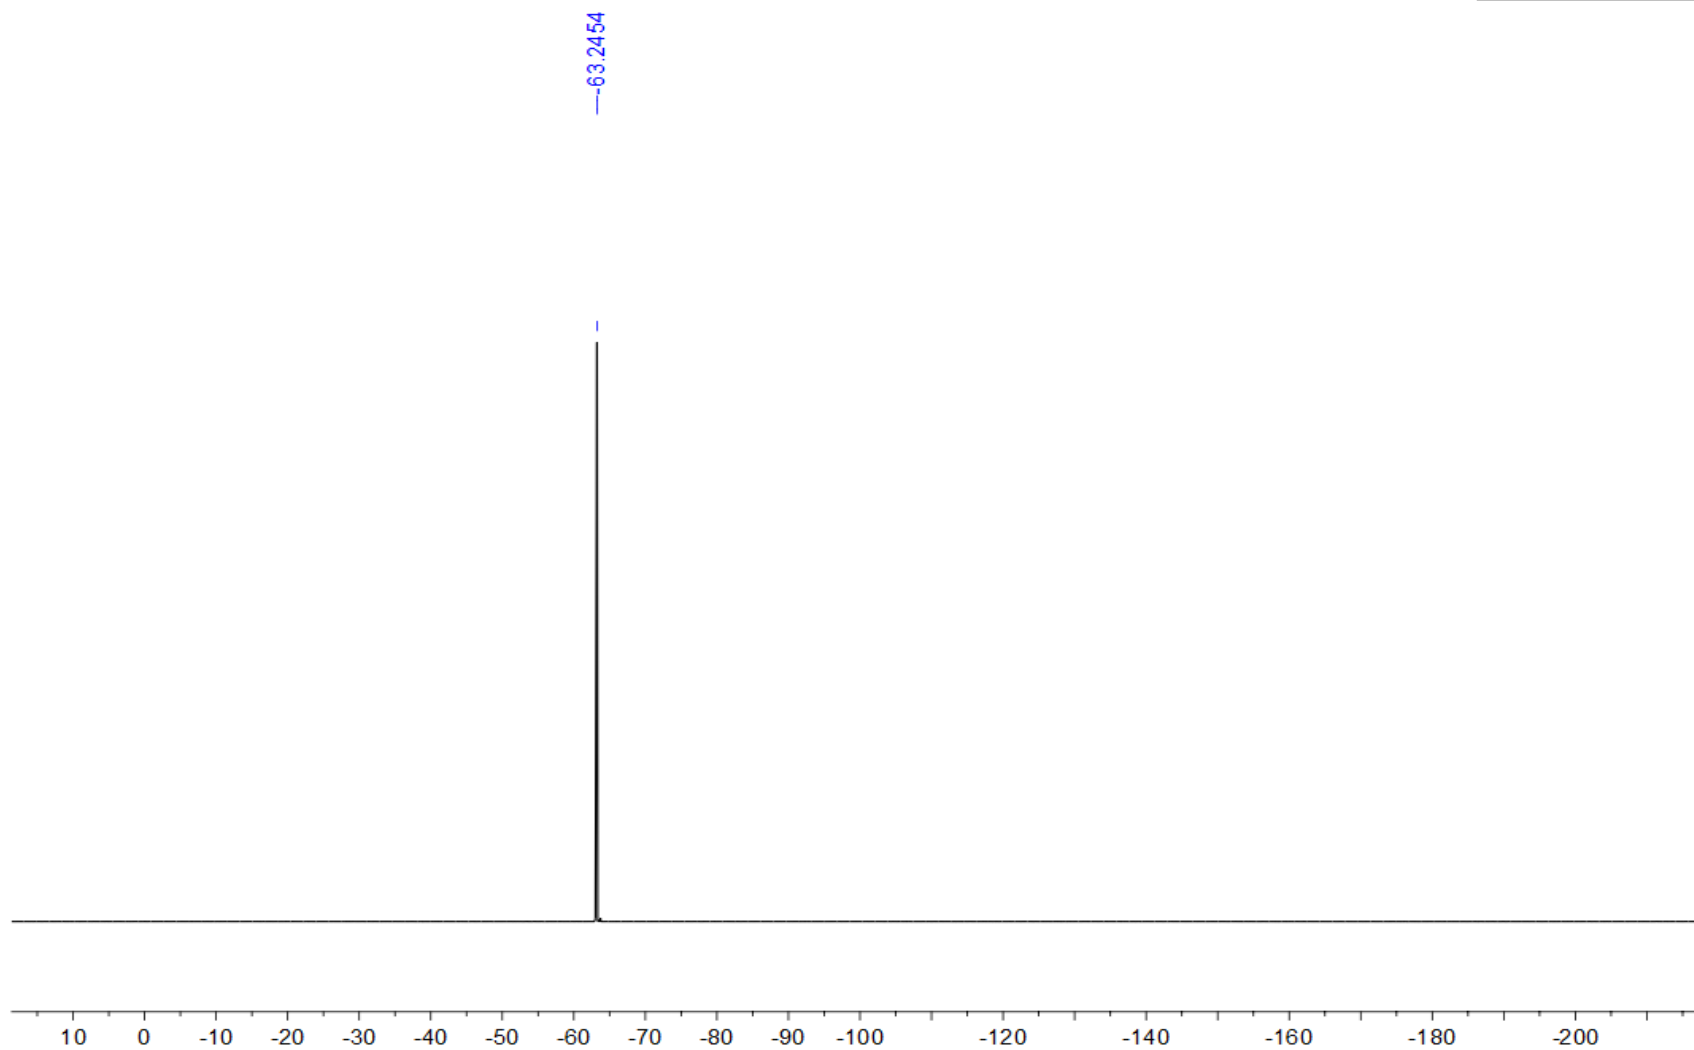



<sup>1</sup>H NMR (400 MHz, CD<sub>3</sub>CN): Compound **18**

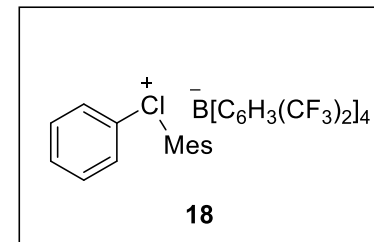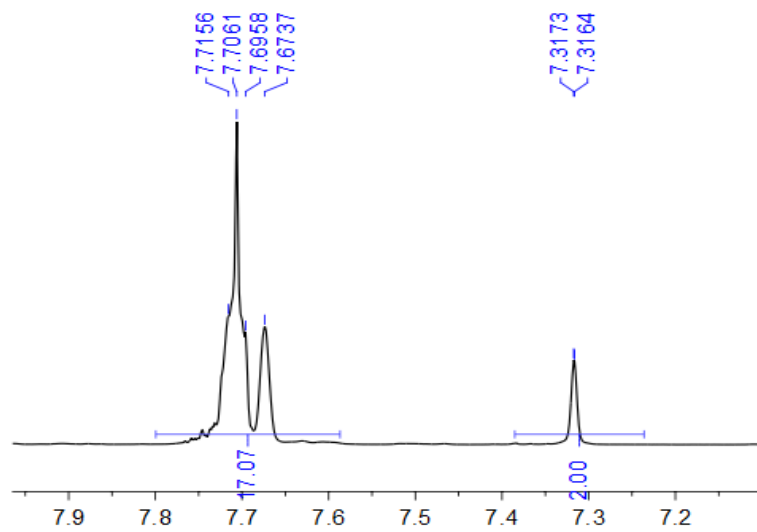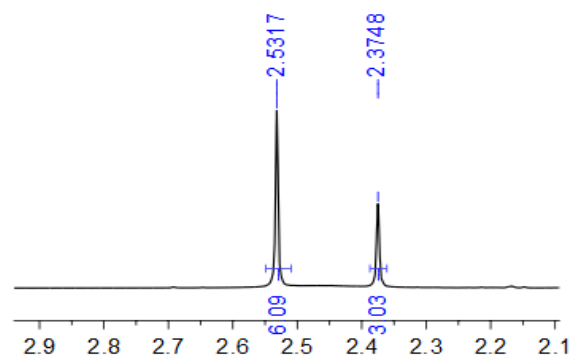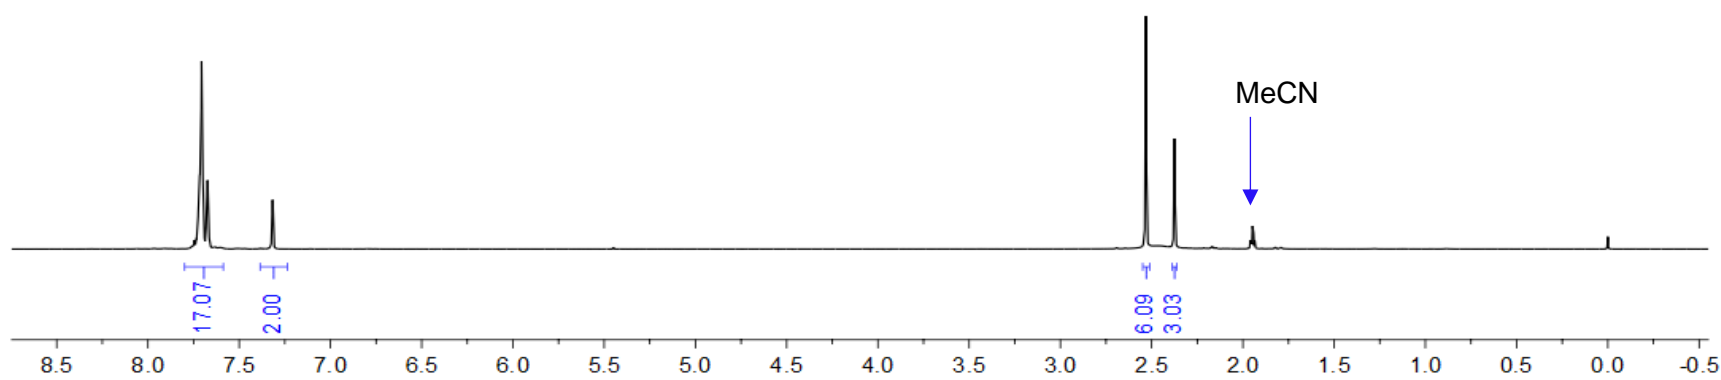

$^{13}\text{C}\{^1\text{H}\}$  NMR (101 MHz,  $\text{CD}_3\text{CN}$ ): Compound **18**

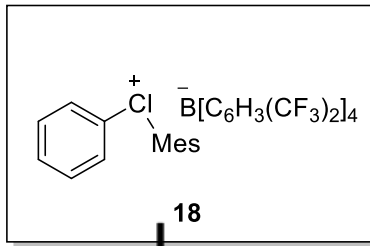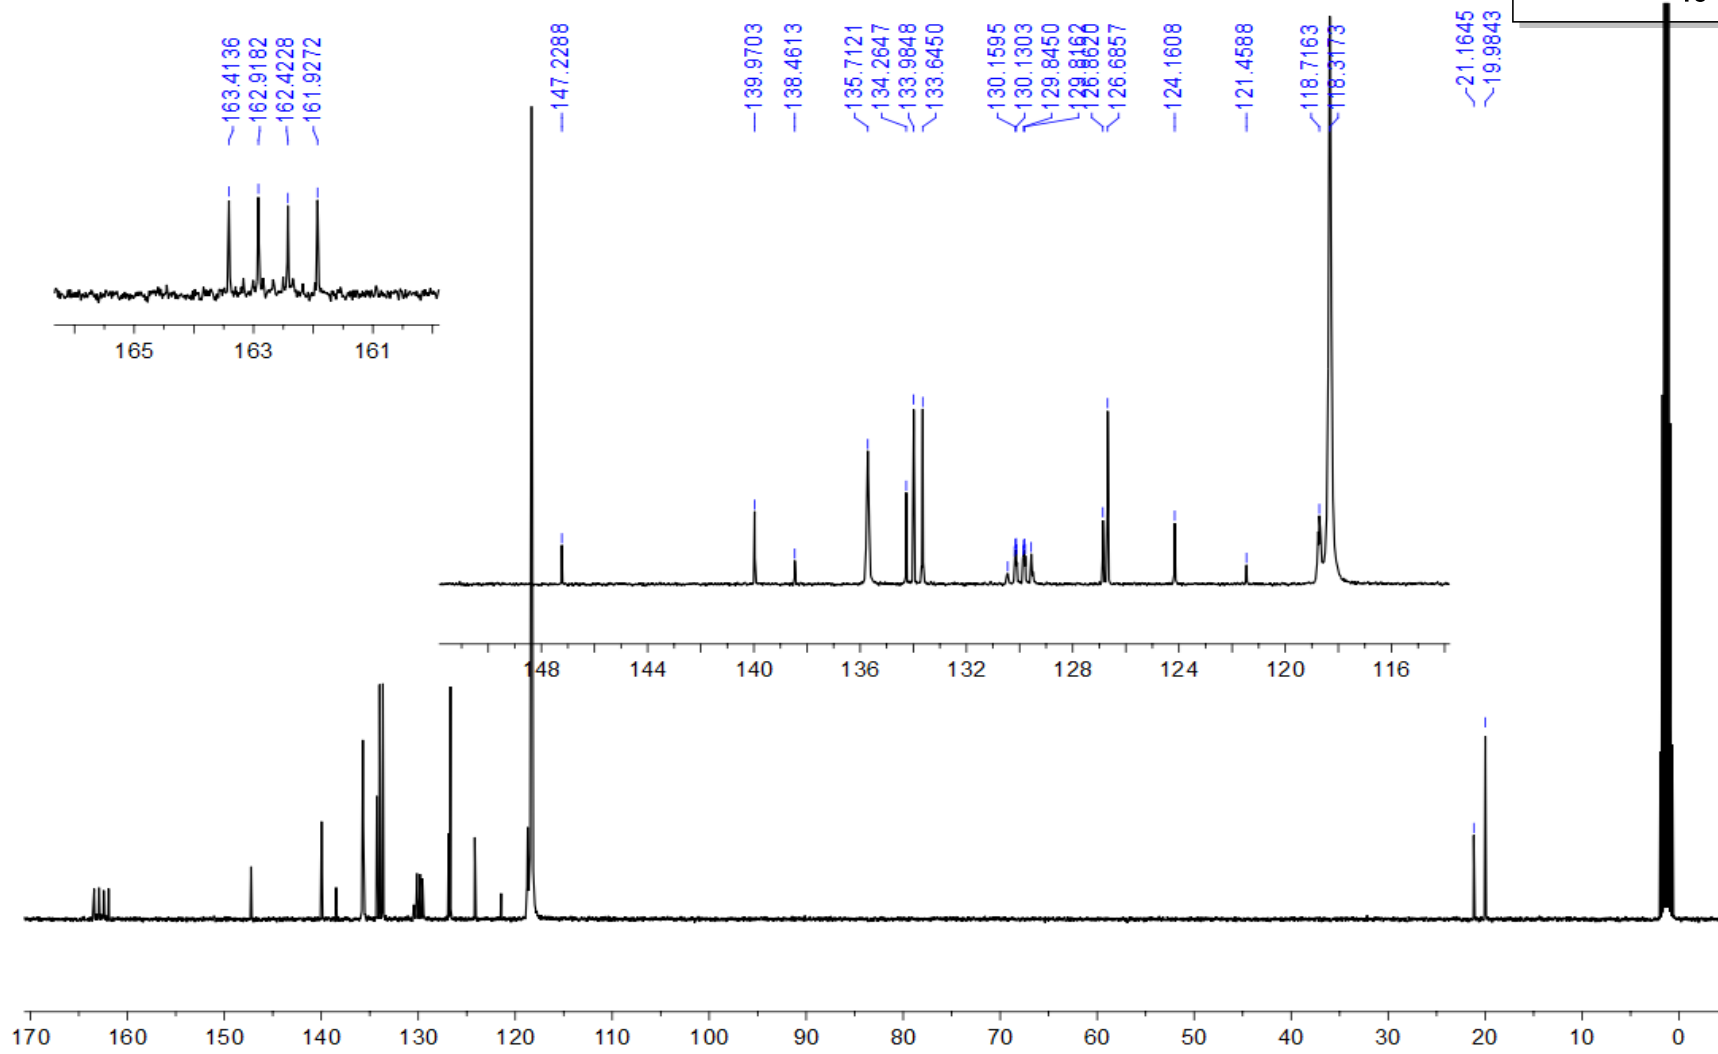

$^{19}\text{F}\{^1\text{H}\}$  NMR (376 MHz,  $\text{CD}_3\text{CN}$ ): Compound **18**

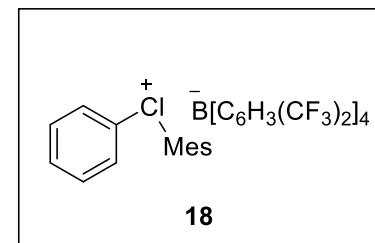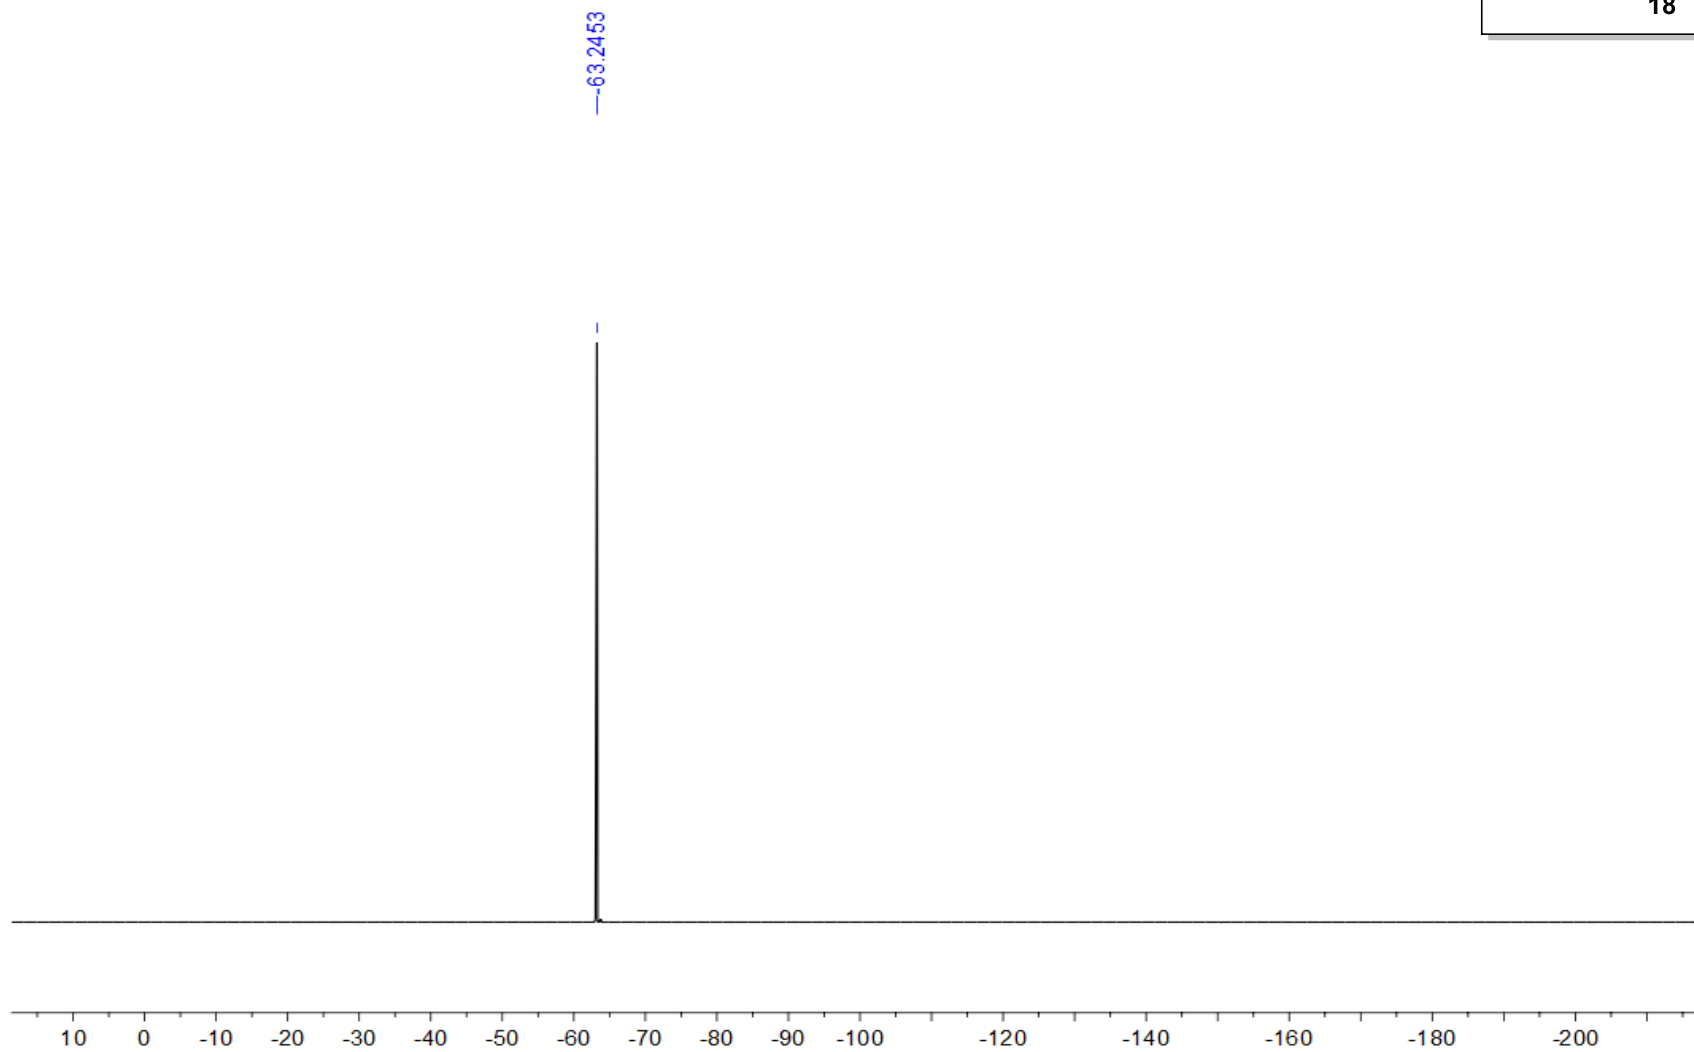

<sup>1</sup>H NMR (400 MHz, CDCl<sub>3</sub>): Compound **19**

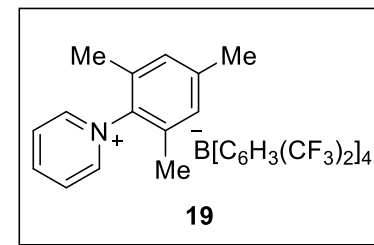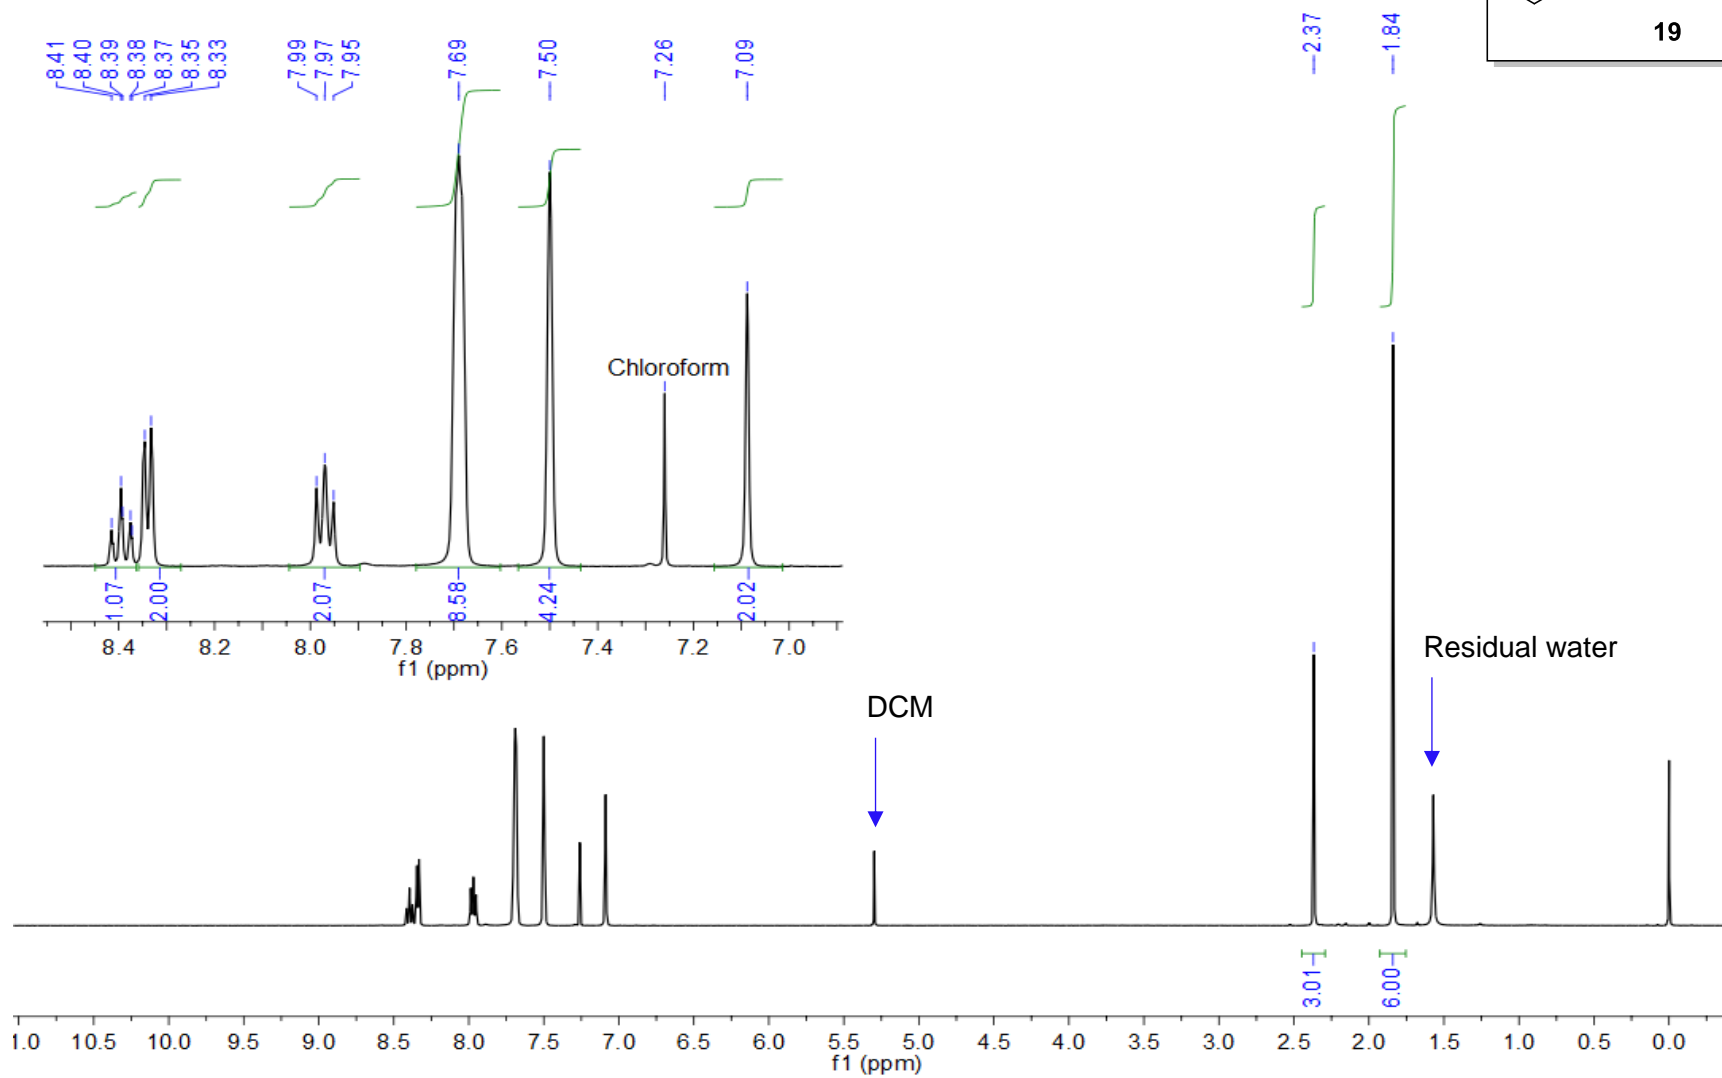

$^{13}\text{C}\{^1\text{H}\}$  NMR (101 MHz, DMSO- $d_6$ ): Compound **19**

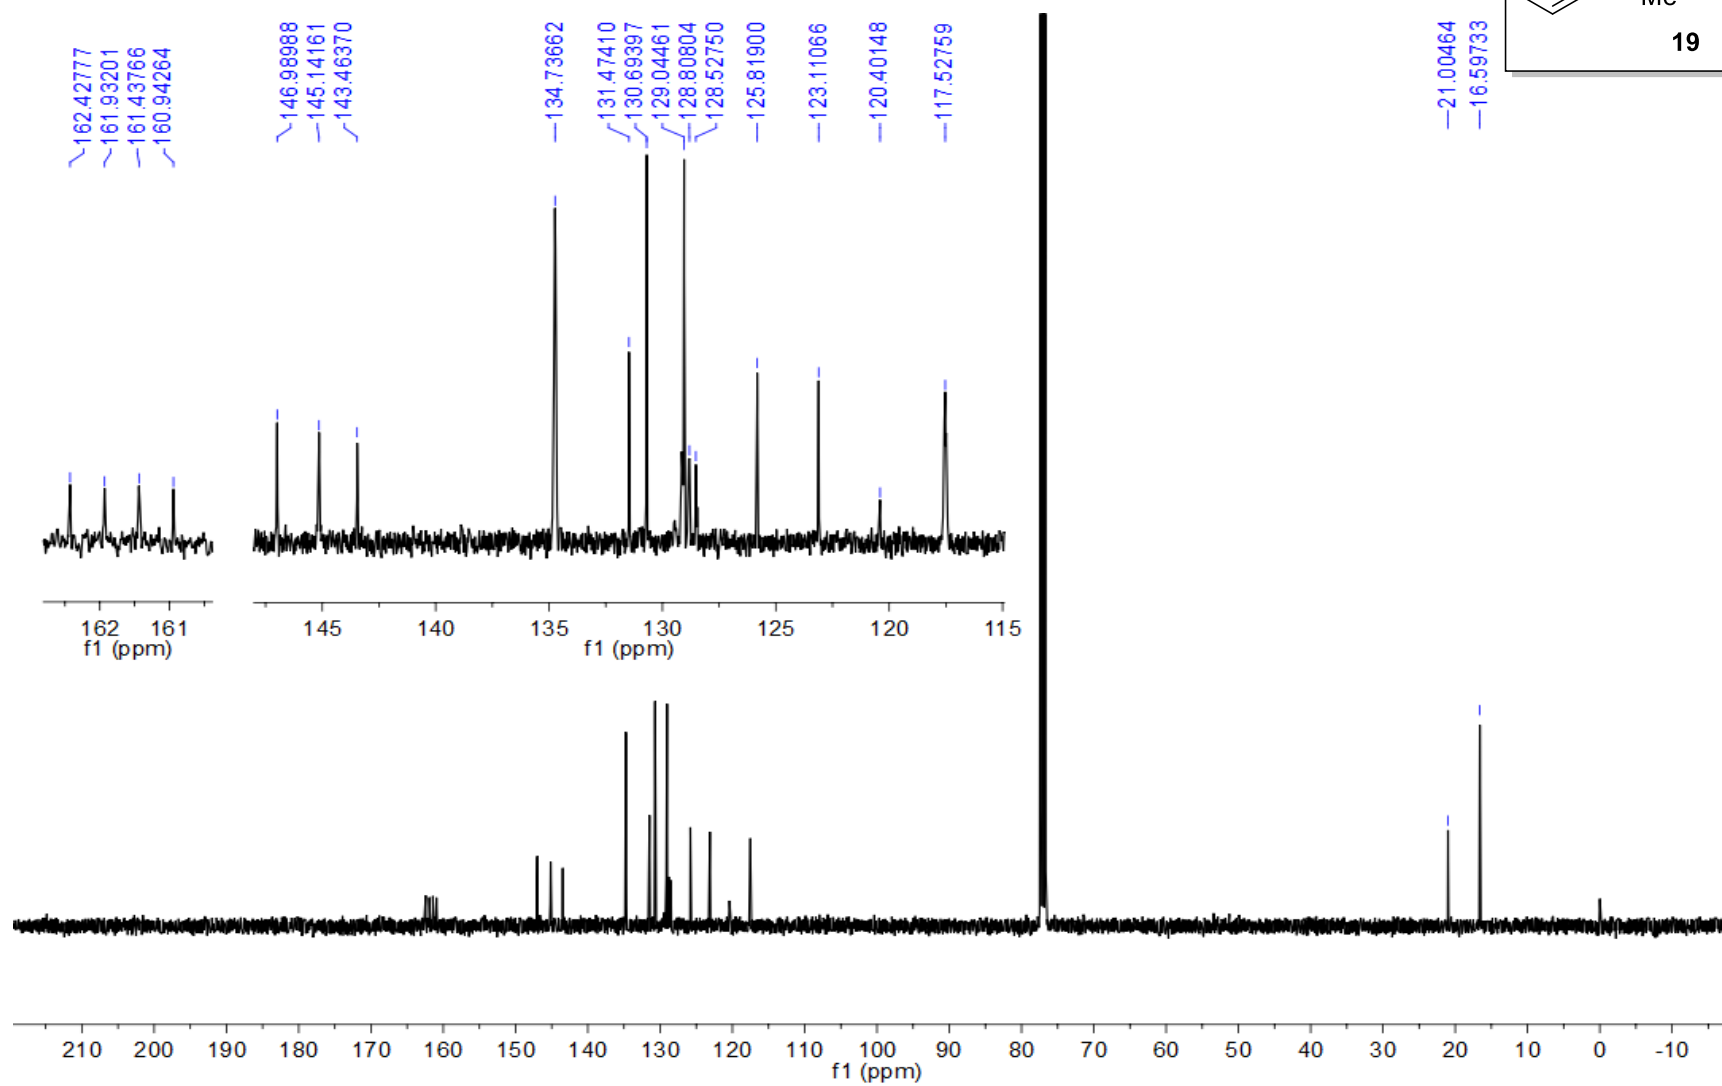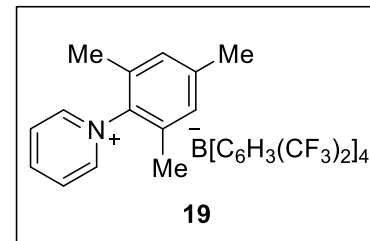

$^{19}\text{F}\{^1\text{H}\}$  NMR (376 MHz, DMSO- $d_6$ ): Compound **19**

—62.36

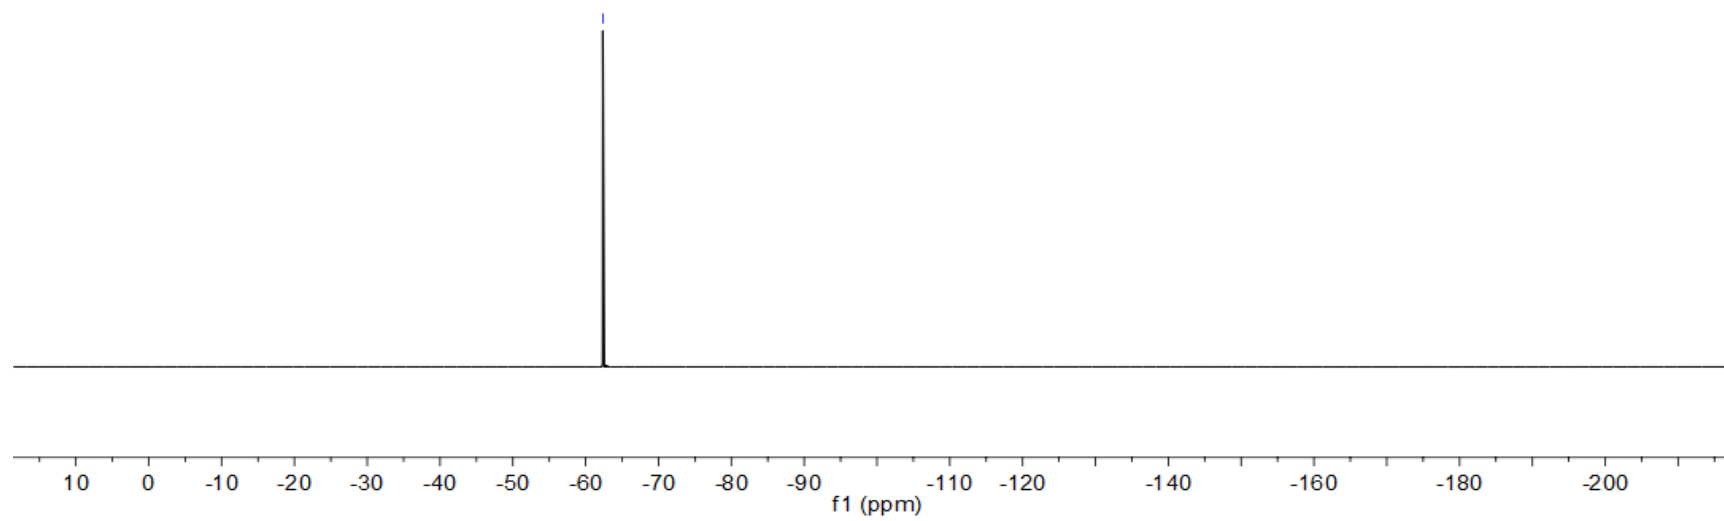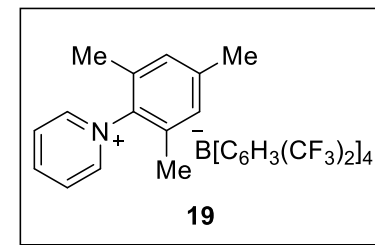

<sup>1</sup>H NMR (400 MHz, DMSO-*d*<sub>6</sub>): Compound **22**

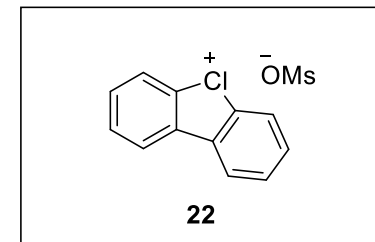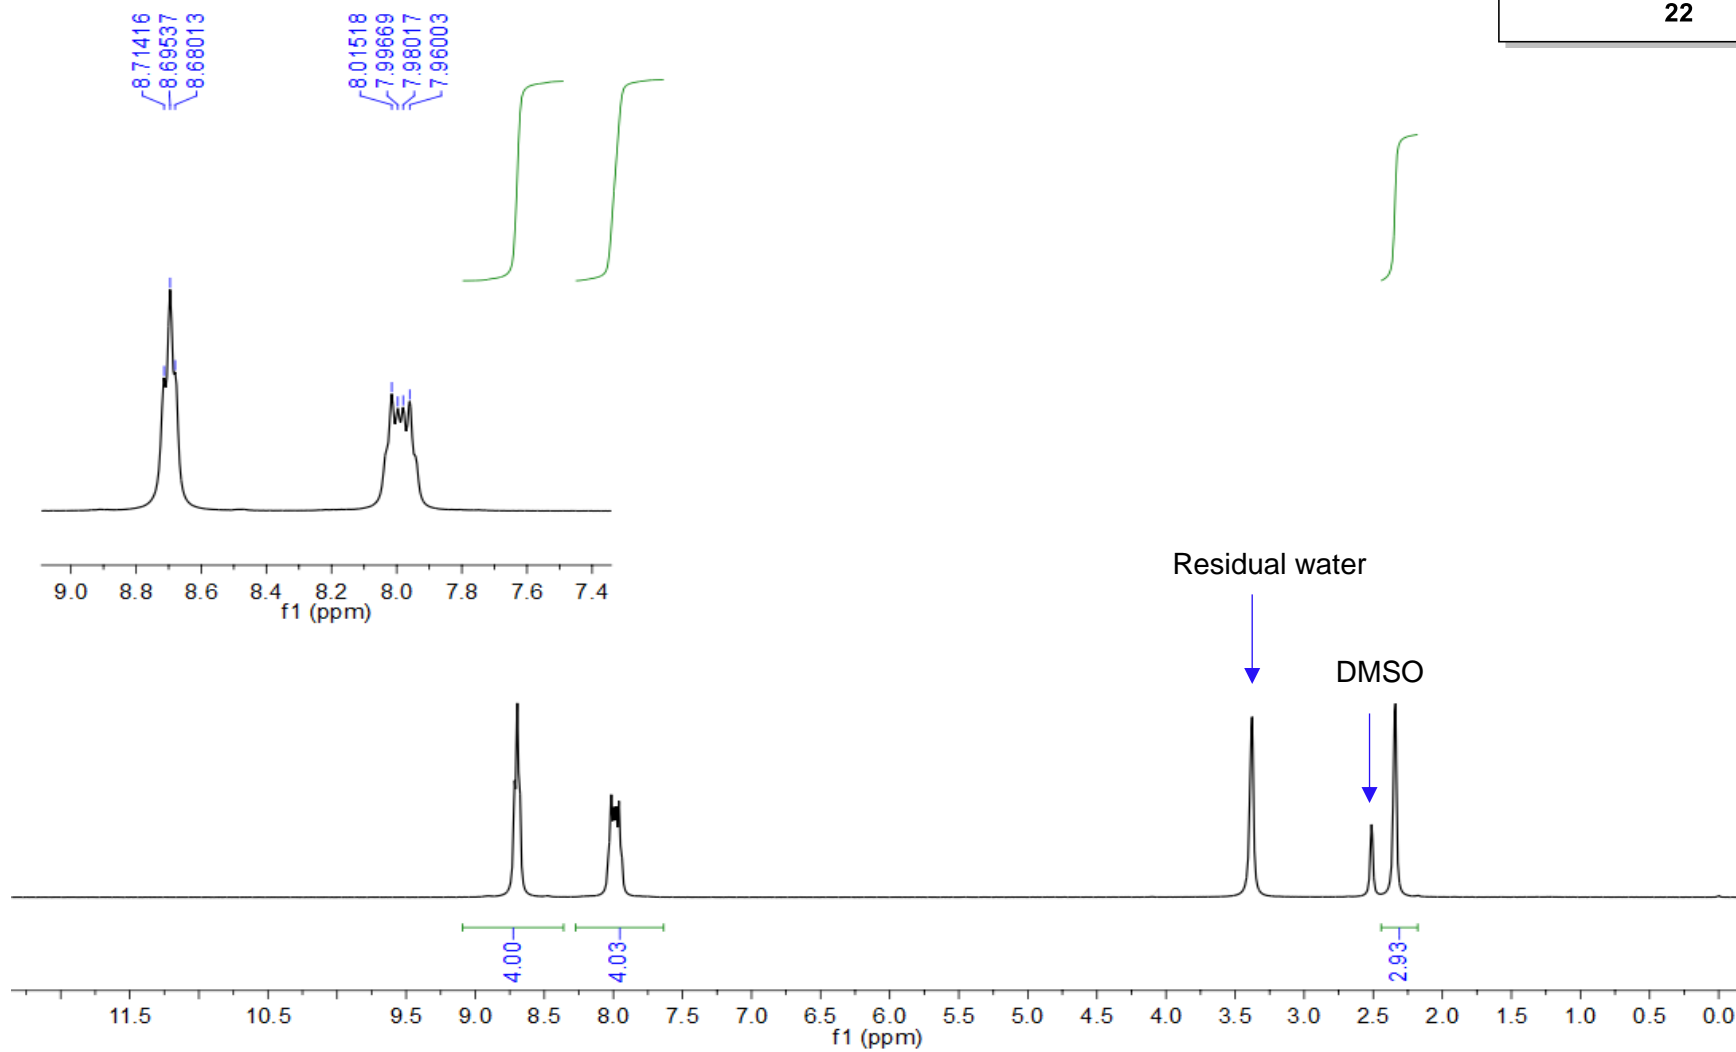

$^{13}\text{C}\{^1\text{H}\}$  NMR (101 MHz, DMSO- $d_6$ ): Compound **22**

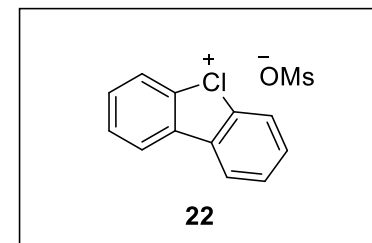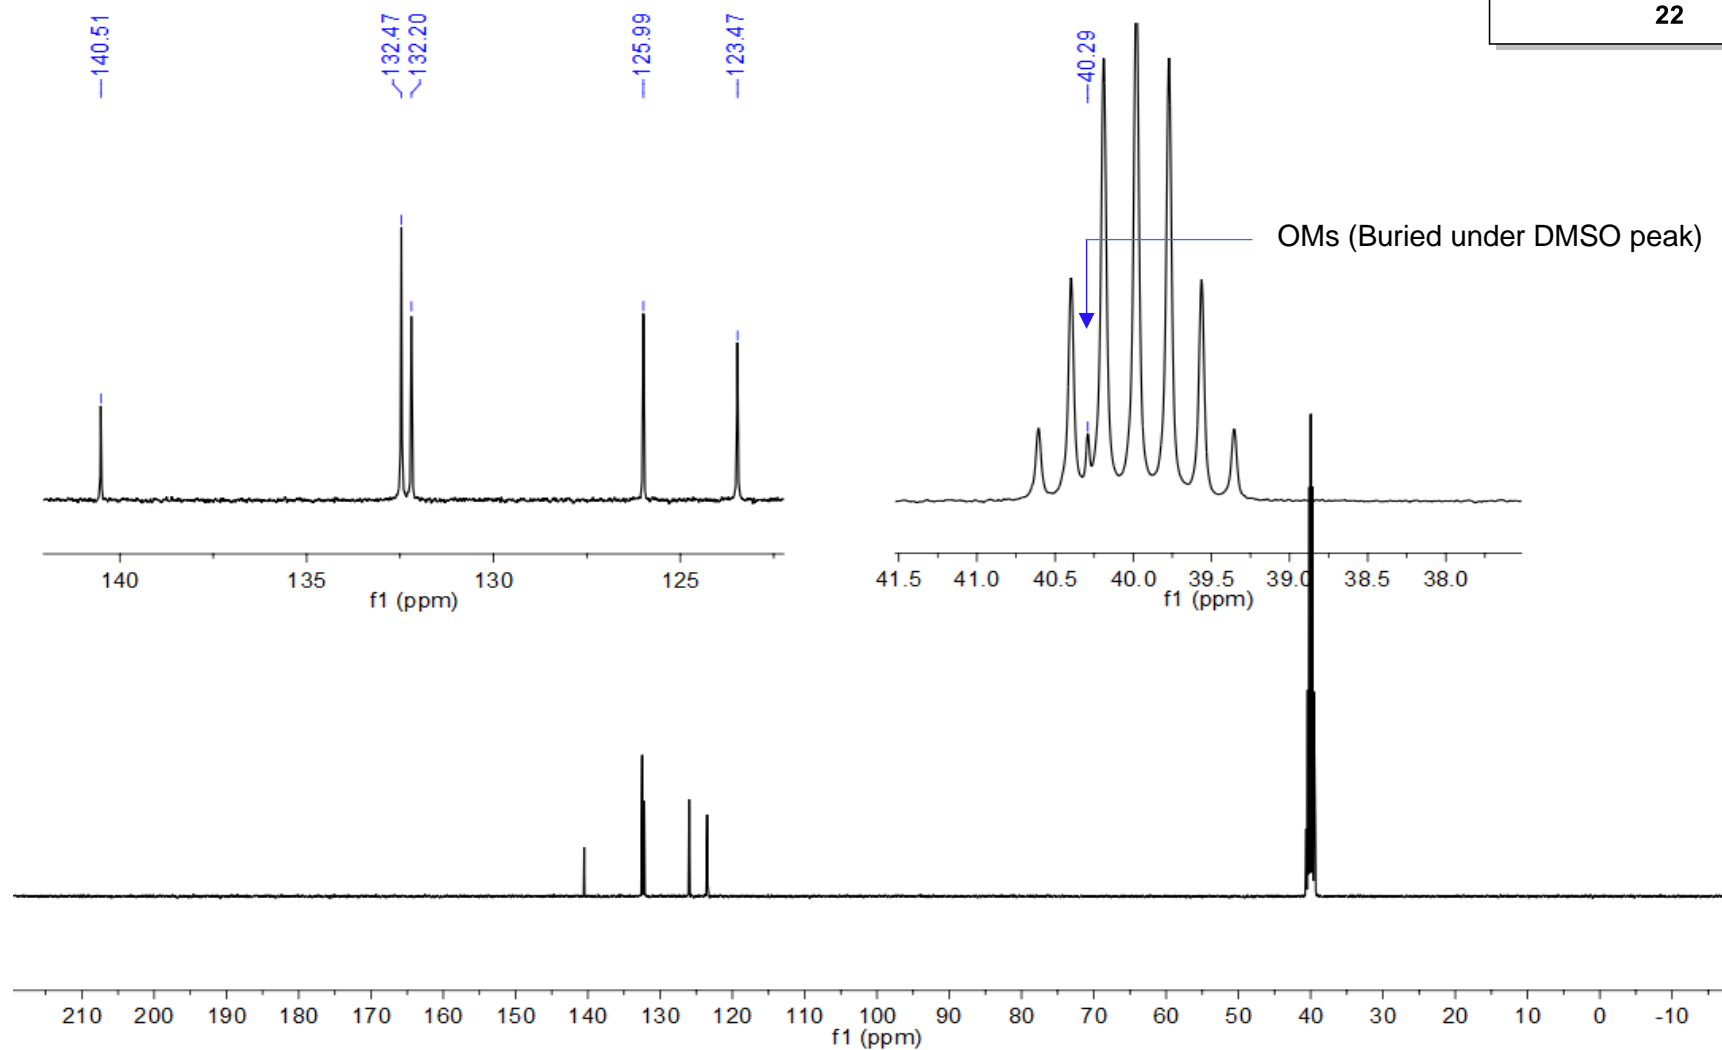



<sup>1</sup>H NMR (400 MHz, CDCl<sub>3</sub>): Compound **25**

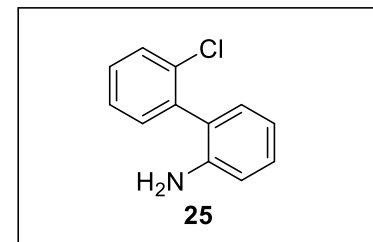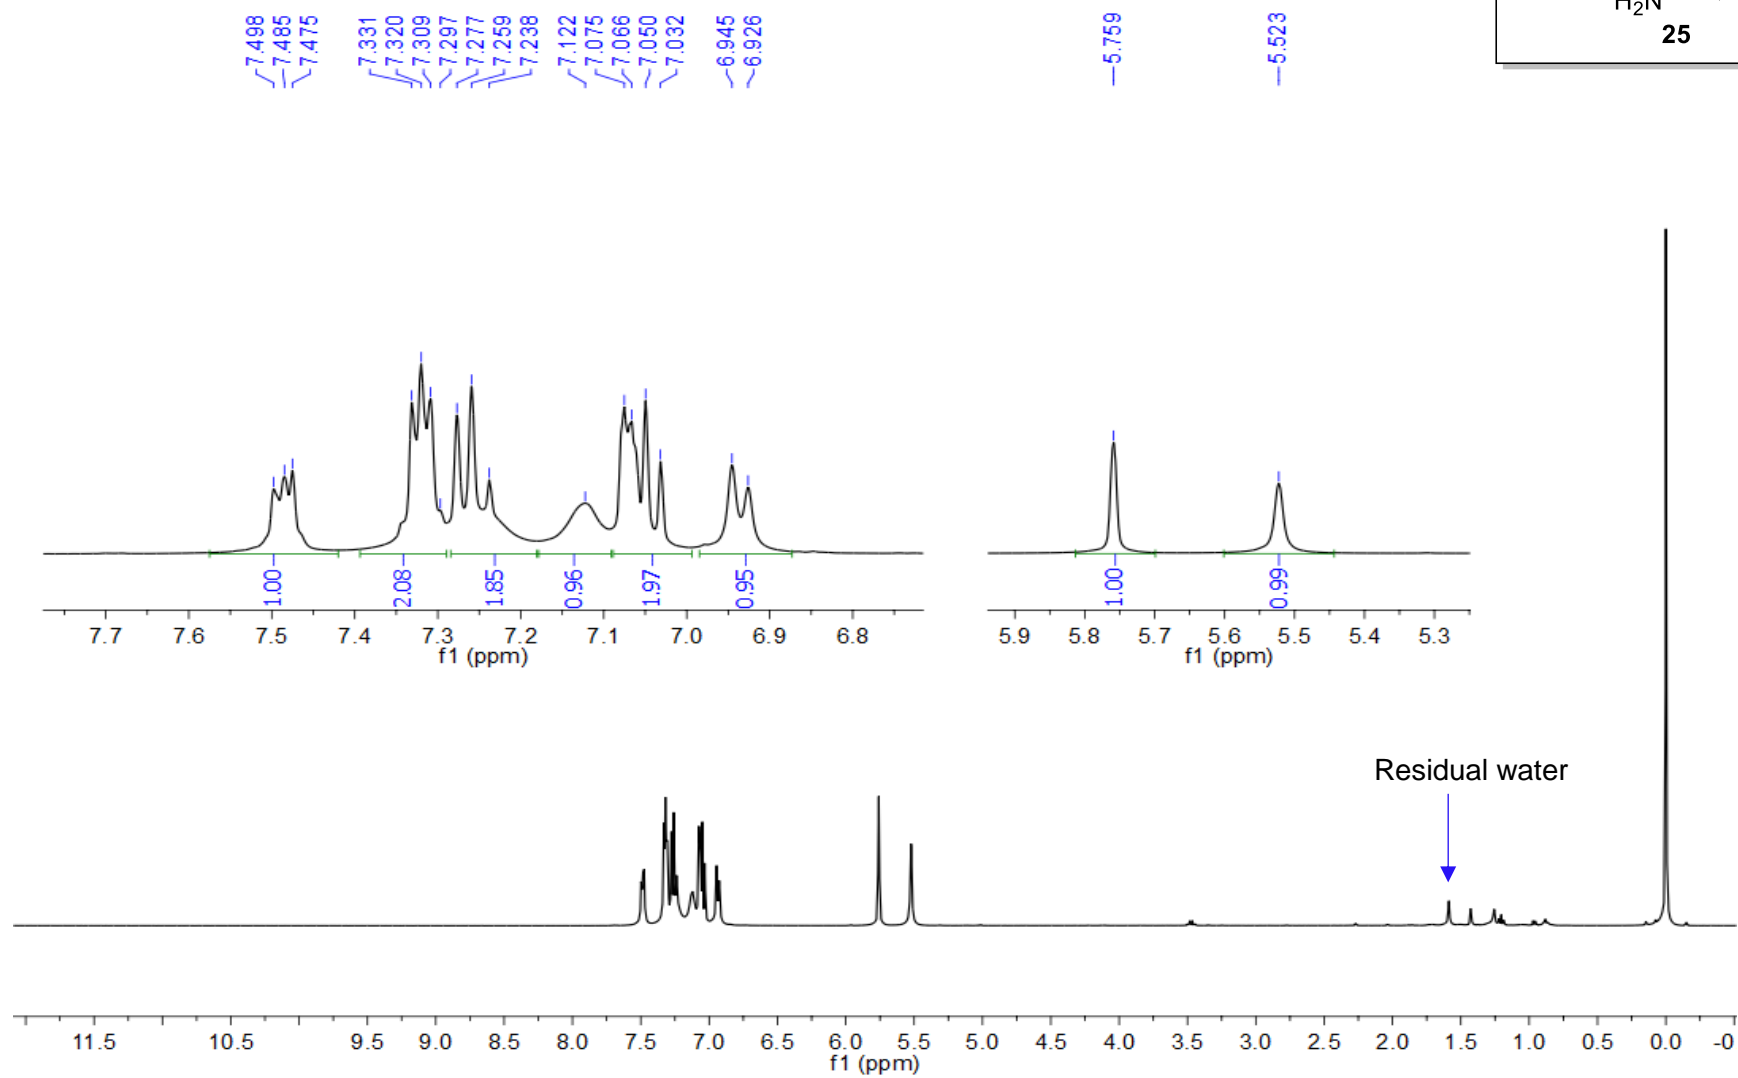

$^{13}\text{C}\{^1\text{H}\}$  NMR (101 MHz,  $\text{CDCl}_3$ ): Compound **25**

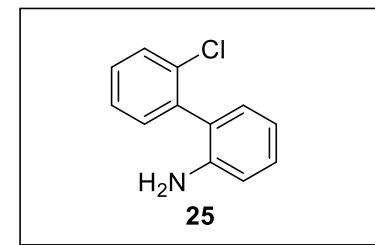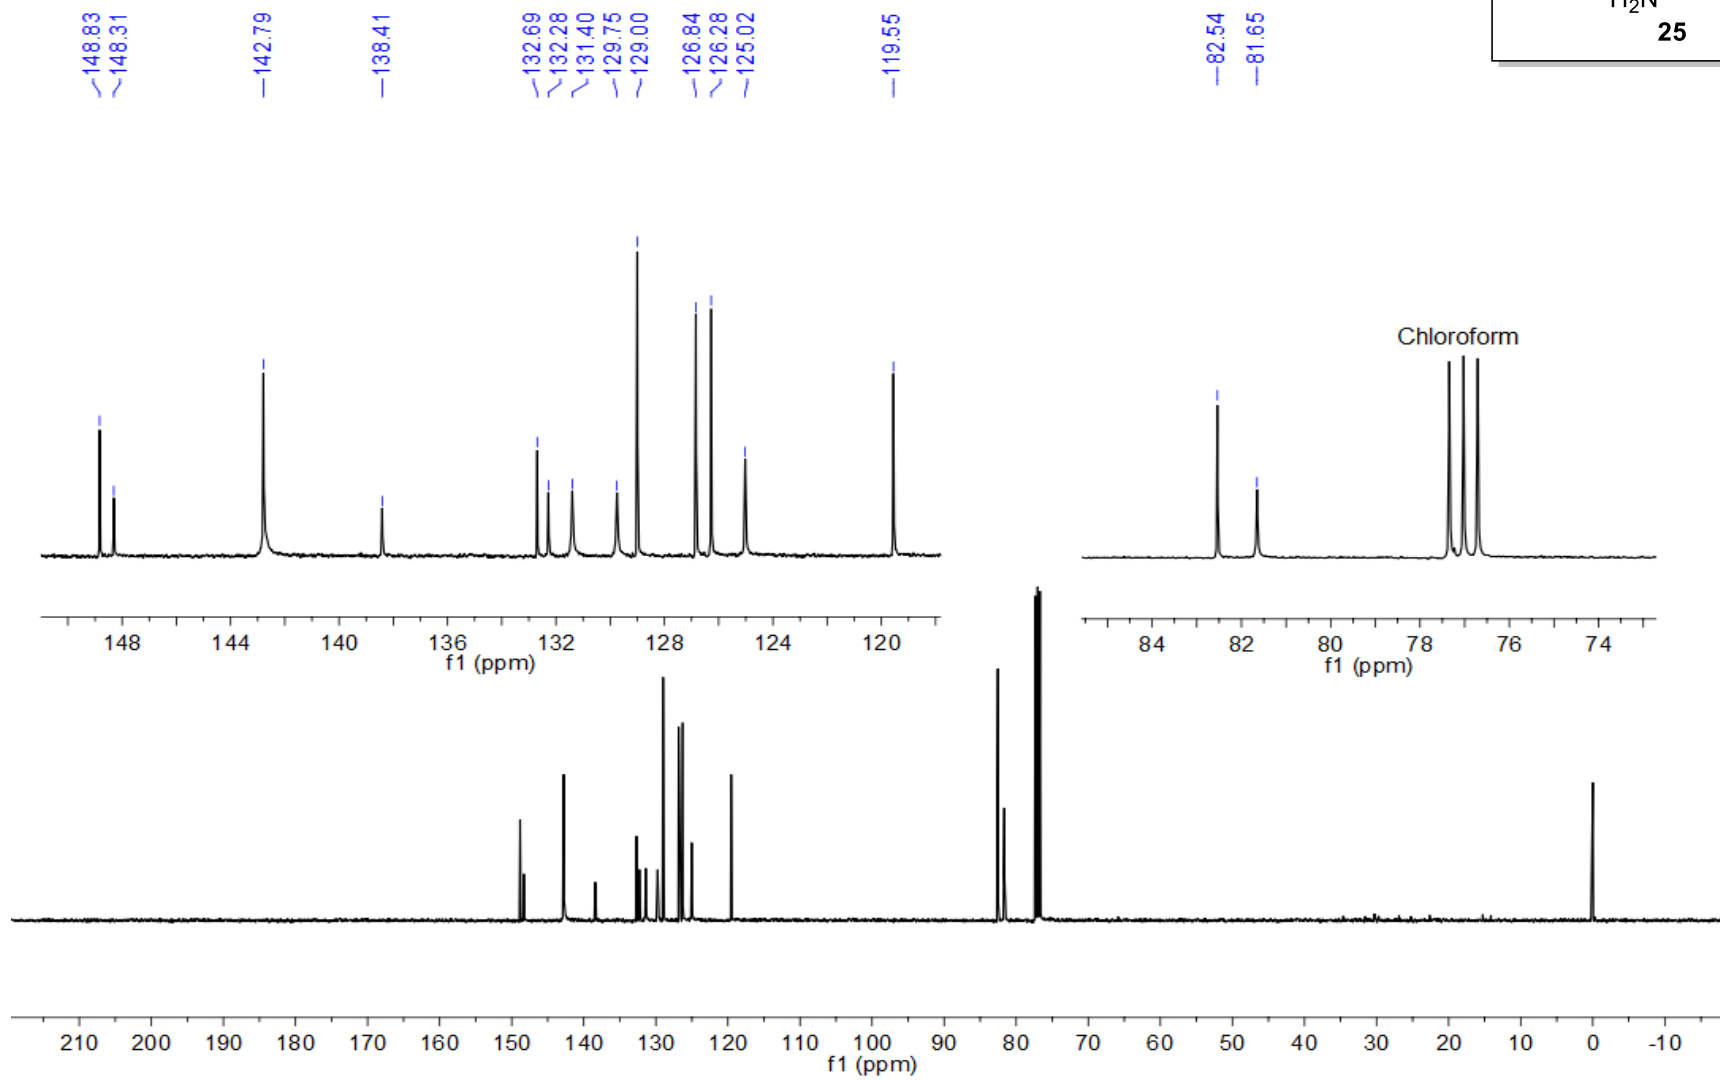

<sup>1</sup>H NMR (600 MHz, DMSO-*d*<sub>6</sub>): Compound **28**

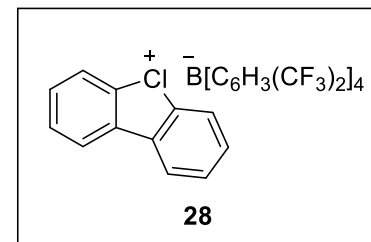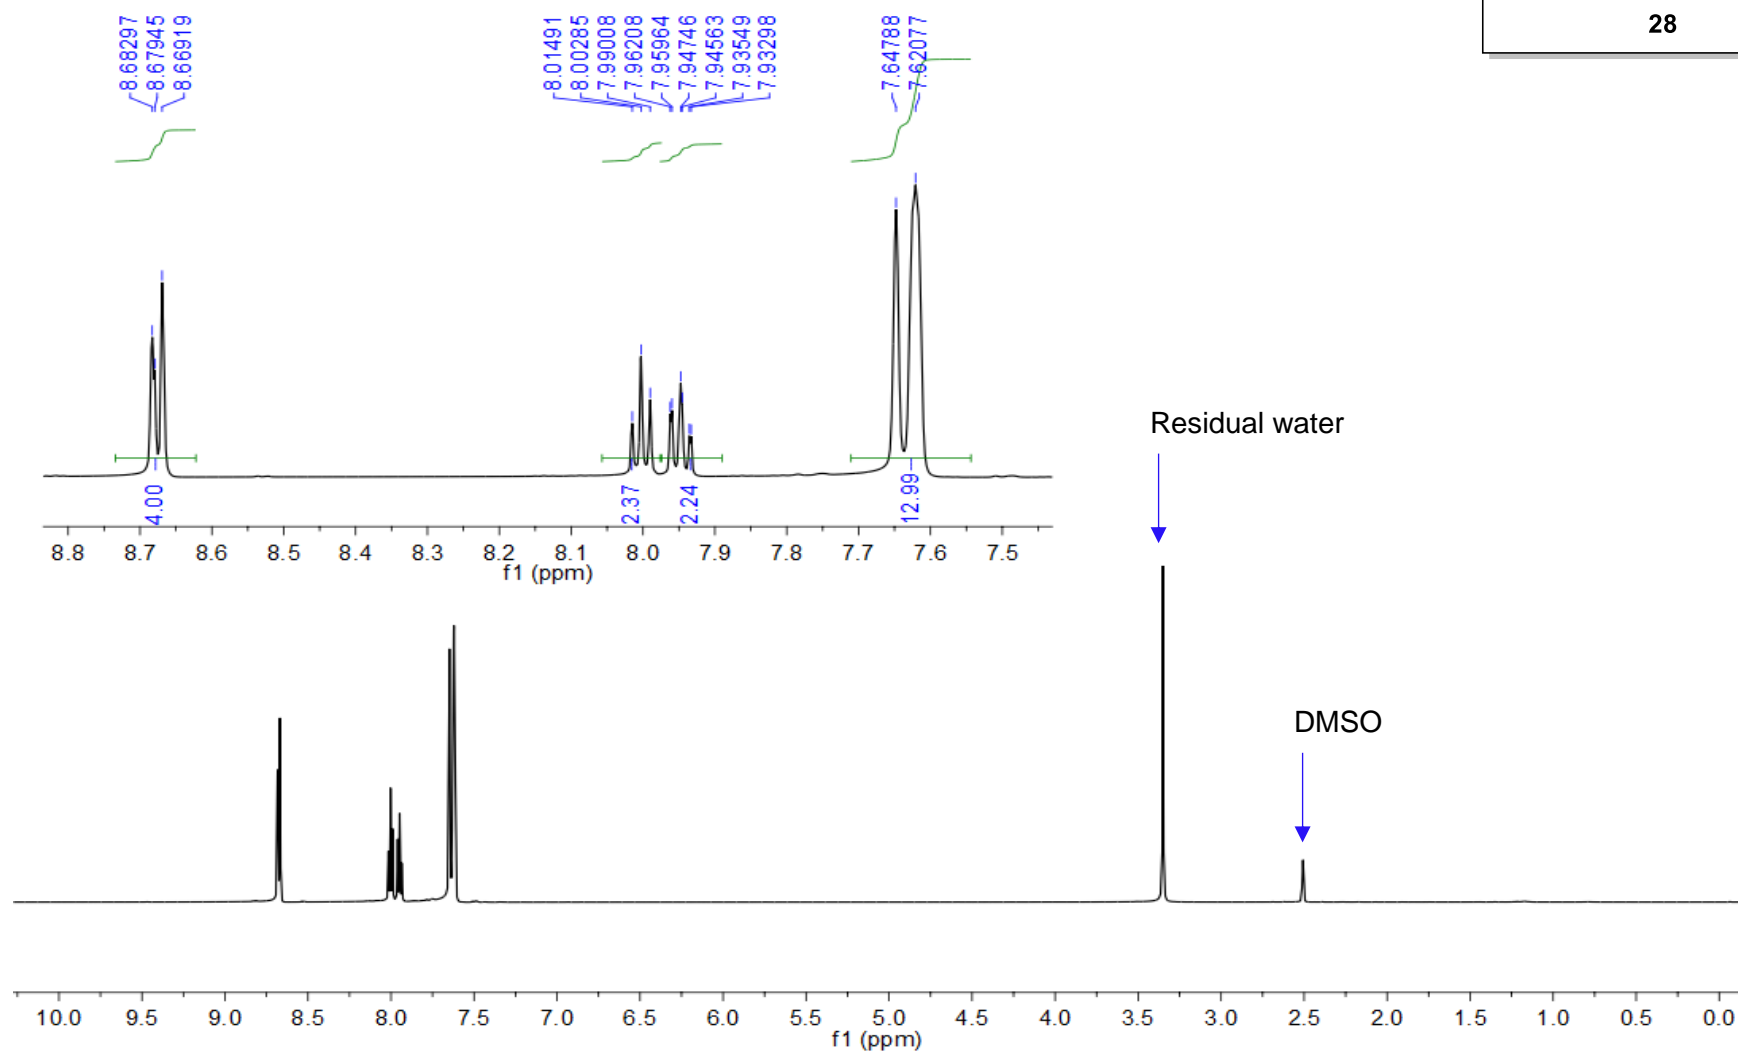

$^{13}\text{C}\{^1\text{H}\}$  NMR (151 MHz,  $\text{DMSO}-d_6$ ): Compound **28**

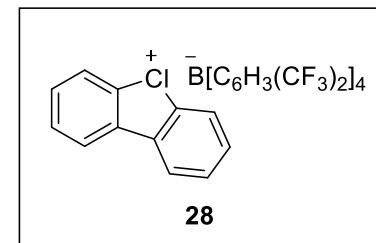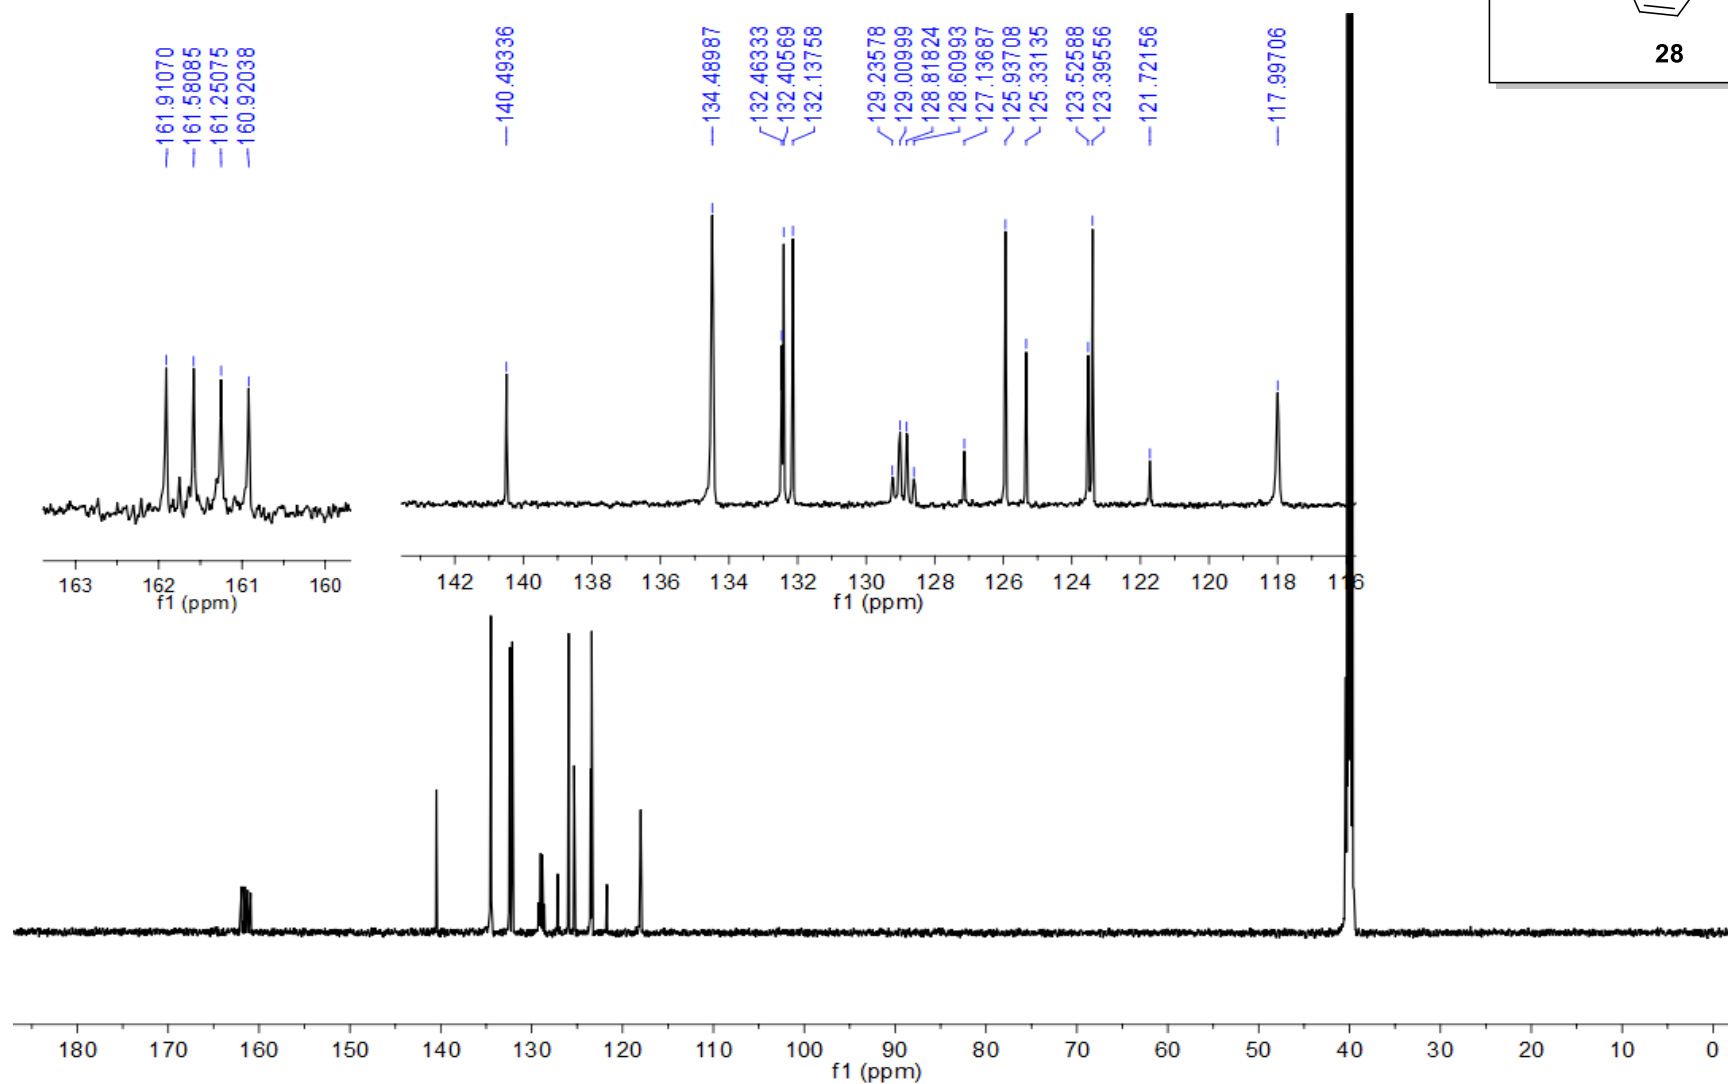

$^{19}\text{F}\{^1\text{H}\}$  NMR (565 MHz,  $\text{DMSO-}d_6$ ): Compound **28**

-61.87704

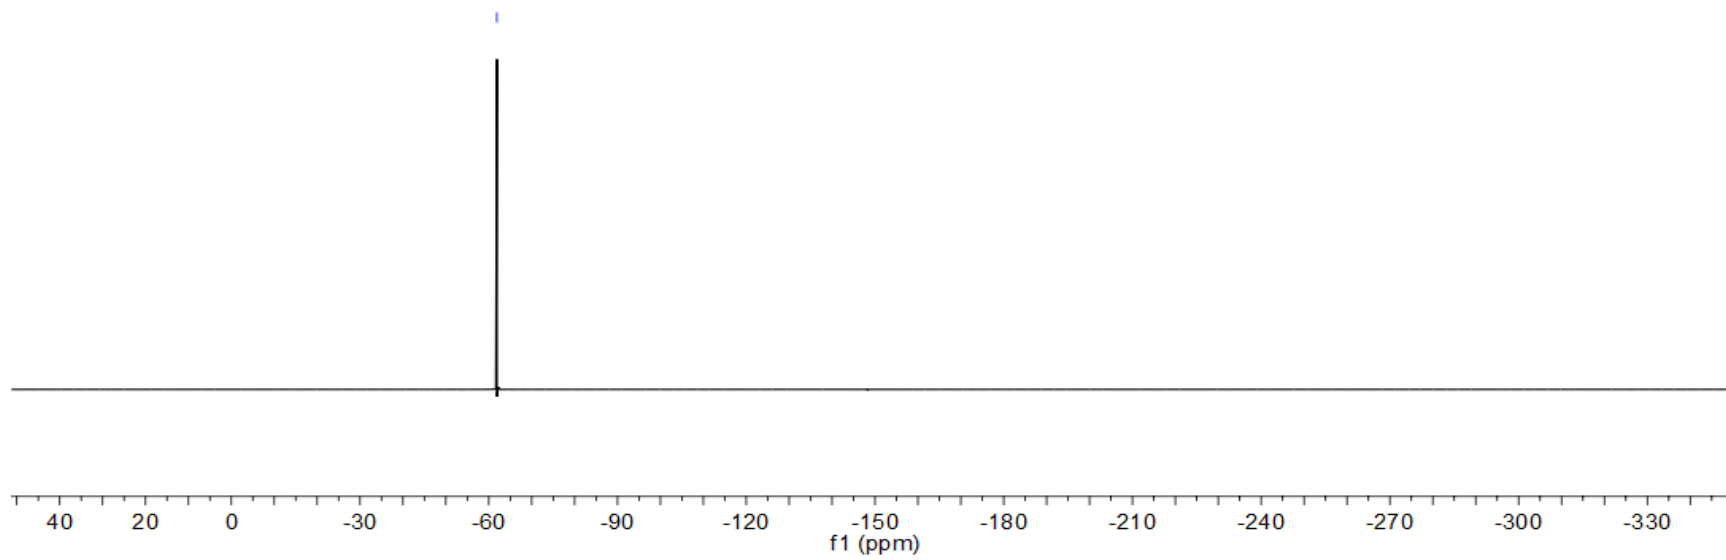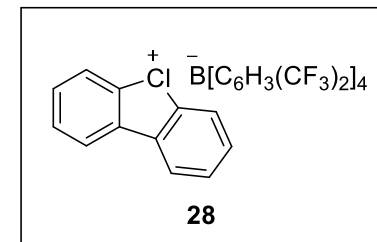

## 11. References

- 1 A. J. Reay, L. A. Hammarback, J. T. W. Bray, T. Sheridan, D. Turnbull, A. C. Whitwood and I. J. S. Fairlamb, *ACS Catal.*, 2017, **7**, 5174–5179.
- 2 S. S. Karandikar and D. R. Stuart, *Chem. Commun.*, 2022, **58**, 1211–1214.
- 3 H. Tinnermann, L. D. M. Nicholls, T. Johannsen, C. Wille, C. Golz, R. Goddard and M. Alcarazo, *ACS Catal.*, 2018, **8**, 10457–10463.
- 4 M. Lanzi, R. A. Ali Abdine, M. De Abreu and J. Wencel-Delord, *Org. Lett.*, 2021, **23**, 9047–9052.
- 5 F. Heinen, E. Engelage, A. Dreger, R. Weiss and S. M. Huber, *Angew. Chemie Int. Ed.*, 2018, **57**, 3830–3833.
- 6 Y. Yoshida, S. Ishikawa, T. Mino and M. Sakamoto, *Chem. Commun.*, 2021, **57**, 2519–2522.
- 7 Y. Watanabe, T. Takagi, K. Miyamoto, J. Kanazawa and M. Uchiyama, *Org. Lett.*, 2020, **22**, 3469–3473.
- 8 H. E. Gottlieb, V. Kotlyar and A. Nudelman, *J. Org. Chem.*, 1997, **62**, 7512–7515.
- 9 M. A. Carroll, S. Martín-Santamaría, V. W. Pike, H. S. Rzepa and D. A. Widdowson, *J. Chem. Soc. Perkin Trans. 2*, 1999, 2707–2714.
- 10 A. D. Becke, *J. Chem. Phys.*, 1993, **98**, 5648–5652.
- 11 C. Lee, W. Yang and R. G. Parr, *Phys. Rev. B*, 1988, **37**, 785–789.
- 12 S. H. Vosko, L. Wilk and M. Nusair, *Can. J. Phys.*, 1980, **58**, 1200–1211.
- 13 P. J. Stephens, F. J. Devlin, C. F. Chabalowski and M. J. Frisch, *J. Phys. Chem.*, 1994, **98**, 11623–11627.
- 14 Y. Zhao and D. G. Truhlar, *Theor. Chem. Acc.*, 2008, **120**, 215–241.
- 15 J. P. Foster and F. Weinhold, *J. Am. Chem. Soc.*, 1980, **102**, 7211–7218.
- 16 A. E. Reed, R. B. Weinstock and F. Weinhold, *J. Chem. Phys.*, 1985, **83**, 735–746.
- 17 J. E. Carpenter and F. Weinhold, *J. Mol. Struct. THEOCHEM*, 1988, **169**, 41–62.
- 18 F. Weinhold and J. E. Carpenter, eds. R. Naaman and Z. Vager, Springer US, Boston, MA, 1988, pp. 227–236.
- 19 T. Lu and F. Chen, *J. Comput. Chem.*, 2012, **33**, 580–592.
- 20 F. C. Tian Lu, *Acta Phys. -Chim. Sin.*, 2012, **28**, 1–18.
- 21 D. Louvel, A. Chelagha, J. Rouillon, P.-A. Payard, L. Khrouz, C. Monnereau and A. Tlili, *Chem. – A Eur. J.*, 2021, **27**, 8704–8708.
